# Supplementary material
Source: PubMed Central journal article supplement (PMC3016711)
Supplement: NIHMS258995-supplement-Suppl_2.pdf [file NIHMS258995-supplement-Suppl_2.pdf]

## S2 Differentially expressed genes in the esophagus of rats tre.

| Reporter Name | Primary Sequence | Sequence Code |
|---------------|------------------|---------------|
| A_44_P549004  | BG372060         | A_44_P549004  |
| A_44_P975250  | TC470965         | A_44_P975250  |
| A_43_P19969   | CB548368         | A_43_P19969   |
| A_44_P1055780 | S100a8           | A_44_P1055780 |
| A_44_P153241  | AI101009         | A_44_P153241  |
| A_44_P830155  | TC487123         | A_44_P830155  |
| A_42_P704429  | Fgf13            | A_42_P704429  |
| A_44_P462505  | CB605666         | A_44_P462505  |
| A_44_P123381  | Prkg2            | A_44_P123381  |
| A_44_P776182  | TC466956         | A_44_P776182  |
| A_42_P787410  | Cacna1b          | A_42_P787410  |
| A_44_P489569  | Ka11             | A_44_P489569  |
| A_42_P458530  | 294570_Rn        | A_42_P458530  |
| A_44_P479766  | BM986564         | A_44_P479766  |
| A_44_P138709  | BI290340         | A_44_P138709  |
| A_42_P791677  | Areg             | A_42_P791677  |
| A_44_P477819  | Nrg1             | A_44_P477819  |
| A_44_P237484  | AA819397         | A_44_P237484  |
| A_44_P809843  | TC513179         | A_44_P809843  |
| A_42_P489764  | 207581_Rn        | A_42_P489764  |
| A_44_P797293  | CO396111         | A_44_P797293  |
| A_44_P916648  | TC500973         | A_44_P916648  |
| A_42_P816479  | Glrx             | A_42_P816479  |
| A_44_P433923  | LOC301215        | A_44_P433923  |
| A_44_P448138  | LOC363434        | A_44_P448138  |
| A_44_P504285  | LOC363638        | A_44_P504285  |
| A_44_P834837  | BI286389         | A_44_P834837  |
| A_44_P126239  | LOC310693        | A_44_P126239  |
| A_44_P527060  | Klk10            | A_44_P527060  |
| A_44_P560973  | TC474012         | A_44_P560973  |
| A_44_P144557  | LOC365848        | A_44_P144557  |
| A_44_P845409  | CA508578         | A_44_P845409  |
| A_43_P19181   | CB548265         | A_43_P19181   |
| A_44_P1039128 | Cxcl10           | A_44_P1039128 |
| A_43_P23392   | BM386666         | A_43_P23392   |
| A_44_P622992  | BC079185         | A_44_P622992  |
| A_44_P1057690 | Dnase1l3         | A_44_P1057690 |
| A_44_P161882  | LOC288070        | A_44_P161882  |
| A_44_P128381  | Serpinb3         | A_44_P128381  |
| A_44_P243708  | LOC367614        | A_44_P243708  |
| A_44_P473243  | LOC305307        | A_44_P473243  |
| A_44_P781967  | A_44_P781967     | A_44_P781967  |
| A_44_P544486  | AA901341         | A_44_P544486  |
| A_42_P545943  | Ca2              | A_42_P545943  |
| A_44_P442765  | keratin 14       | A_44_P442765  |
| A_43_P23458   | BQ195790         | A_43_P23458   |
| A_44_P165986  | LOC292852        | A_44_P165986  |
| A_44_P272784  | AA925727         | A_44_P272784  |

|               |               |               |
|---------------|---------------|---------------|
| A_44_P135020  | LOC259244     | A_44_P135020  |
| A_44_P630174  | AI234967      | A_44_P630174  |
| A_44_P288881  | LOC288074     | A_44_P288881  |
| A_44_P365569  | LOC313837     | A_44_P365569  |
| A_44_P213175  | LOC291530     | A_44_P213175  |
| A_44_P251064  | Ka14          | A_44_P251064  |
| A_42_P832728  | LOC296257     | A_42_P832728  |
| A_44_P347230  | LOC363379     | A_44_P347230  |
| A_44_P163968  | LOC363409     | A_44_P163968  |
| A_44_P1038028 | Tnfrsf12a     | A_44_P1038028 |
| A_44_P278960  | LOC310575     | A_44_P278960  |
| A_44_P676327  | TC466954      | A_44_P676327  |
| A_44_P883869  | TC466009      | A_44_P883869  |
| A_44_P752186  | AW921971      | A_44_P752186  |
| A_44_P880441  | AW921293      | A_44_P880441  |
| A_44_P995483  | Mug1          | A_44_P995483  |
| A_43_P11654   | Pnoc          | A_43_P11654   |
| A_42_P723173  | Id1           | A_42_P723173  |
| A_44_P1013314 | LOC298693     | A_44_P1013314 |
| A_44_P562582  | TC494569      | A_44_P562582  |
| A_44_P992908  | Hsp27         | A_44_P992908  |
| A_44_P592667  | TC489988      | A_44_P592667  |
| A_44_P398142  | Btg2          | A_44_P398142  |
| A_44_P242958  | Ttpa          | A_44_P242958  |
| A_44_P326133  | LOC296723     | A_44_P326133  |
| A_44_P711401  | AI535080      | A_44_P711401  |
| A_44_P378742  | AI058645      | A_44_P378742  |
| A_43_P14904   | Prss9         | A_43_P14904   |
| A_44_P249990  | Mal2          | A_44_P249990  |
| A_44_P319322  | Krt12         | A_44_P319322  |
| A_44_P496643  | ENSRNOT000000 | A_44_P496643  |
| A_44_P352268  | Snk           | A_44_P352268  |
| A_44_P1060108 | Ptmb10        | A_44_P1060108 |
| A_44_P791139  | ENSRNOT000000 | A_44_P791139  |
| A_44_P562894  | TC497705      | A_44_P562894  |
| A_44_P549840  | LOC363720     | A_44_P549840  |
| A_44_P729179  | BC088265      | A_44_P729179  |
| A_44_P438313  | LOC304689     | A_44_P438313  |
| A_44_P379377  | Fetub         | A_44_P379377  |
| A_44_P533959  | Cd36l2        | A_44_P533959  |
| A_42_P685660  | AW141081      | A_42_P685660  |
| A_44_P608892  | TC501306      | A_44_P608892  |
| A_44_P138015  | LOC311450     | A_44_P138015  |
| A_44_P212964  | LOC360914     | A_44_P212964  |
| A_43_P11546   | Cd24          | A_43_P11546   |
| A_42_P749550  | 205049_Rn     | A_42_P749550  |
| A_44_P1035656 | Cd24          | A_44_P1035656 |
| A_44_P507571  | AW913890      | A_44_P507571  |
| A_44_P179904  | Sh2d2a        | A_44_P179904  |
| A_44_P416359  | CA508578      | A_44_P416359  |
| A_44_P992578  | Rrm2          | A_44_P992578  |

|               |                 |               |
|---------------|-----------------|---------------|
| A_43_P11614   | Anxa1           | A_43_P11614   |
| A_44_P945840  | TC485694        | A_44_P945840  |
| A_44_P399249  | Tgm1            | A_44_P399249  |
| A_42_P623839  | LOC298186       | A_42_P623839  |
| A_44_P849592  | BF545957        | A_44_P849592  |
| A_44_P557217  | Cst6            | A_44_P557217  |
| A_44_P499327  | LOC362368       | A_44_P499327  |
| A_42_P568172  | Abcc5           | A_42_P568172  |
| A_44_P1001317 | AA801255        | A_44_P1001317 |
| A_44_P105034  | Alox5           | A_44_P105034  |
| A_44_P390495  | Gch             | A_44_P390495  |
| A_44_P191672  | Ka17            | A_44_P191672  |
| A_44_P183290  | AA900739        | A_44_P183290  |
| A_43_P14115   | CB547318        | A_43_P14115   |
| A_44_P634946  | BQ035302        | A_44_P634946  |
| A_44_P428338  | Ptpn16          | A_44_P428338  |
| A_44_P391498  | LOC305698       | A_44_P391498  |
| A_44_P374909  | AB097854        | A_44_P374909  |
| A_44_P527780  | LOC299216       | A_44_P527780  |
| A_42_P490296  | Itgb4           | A_42_P490296  |
| A_44_P283153  | Cdig1l          | A_44_P283153  |
| A_44_P367761  | Ccng1           | A_44_P367761  |
| A_44_P283385  | Gip             | A_44_P283385  |
| A_44_P838961  | TC489960        | A_44_P838961  |
| A_43_P17770   | BE095788        | A_43_P17770   |
| A_42_P812263  | 219818_Rn       | A_42_P812263  |
| A_44_P305689  | CB547318        | A_44_P305689  |
| A_44_P351209  | Tdag            | A_44_P351209  |
| A_44_P405022  | Kb1             | A_44_P405022  |
| A_44_P188047  | AF198087        | A_44_P188047  |
| A_44_P243081  | LOC366263       | A_44_P243081  |
| A_42_P763424  | 202256_Rn       | A_42_P763424  |
| A_42_P640792  | 293856_Rn       | A_42_P640792  |
| A_43_P14228   | AI411057        | A_43_P14228   |
| A_44_P225286  | LOC367252       | A_44_P225286  |
| A_44_P170111  | Glrx            | A_44_P170111  |
| A_44_P1013376 | LOC312670       | A_44_P1013376 |
| A_44_P233786  | Vgf             | A_44_P233786  |
| A_44_P420503  | Slpil2          | A_44_P420503  |
| A_42_P695401  | Scya2           | A_42_P695401  |
| A_44_P1013006 | LOC297738       | A_44_P1013006 |
| A_42_P577431  | 295616_Rn       | A_42_P577431  |
| A_44_P235919  | Ccng1           | A_44_P235919  |
| A_44_P1035148 | TC483343        | A_44_P1035148 |
| A_42_P679371  | 208234_Rn       | A_42_P679371  |
| A_44_P287089  | Gmfb            | A_44_P287089  |
| A_44_P202988  | Odc1            | A_44_P202988  |
| A_44_P474101  | Slc7a1          | A_44_P474101  |
| A_43_P16492   | CB545140        | A_43_P16492   |
| A_43_P19145   | AM:ARG11-032276 | A_43_P19145   |
| A_44_P777088  | TC484426        | A_44_P777088  |

|               |               |               |
|---------------|---------------|---------------|
| A_44_P359040  | LOC299153     | A_44_P359040  |
| A_44_P161233  | Il18          | A_44_P161233  |
| A_43_P16762   | BQ196556      | A_43_P16762   |
| A_44_P223978  | Cdkn1c        | A_44_P223978  |
| A_42_P758222  | Arg1          | A_42_P758222  |
| A_44_P397495  | Hif1a         | A_44_P397495  |
| A_44_P670167  | TC496874      | A_44_P670167  |
| A_44_P524359  | Anxa1         | A_44_P524359  |
| A_44_P1009603 | LOC300126     | A_44_P1009603 |
| A_43_P14911   | Il1b          | A_43_P14911   |
| A_44_P370715  | LOC298721     | A_44_P370715  |
| A_44_P294817  | LOC287552     | A_44_P294817  |
| A_44_P112222  | LOC365847     | A_44_P112222  |
| A_44_P215467  | LOC310784     | A_44_P215467  |
| A_44_P114833  | LOC302192     | A_44_P114833  |
| A_44_P603871  | AW914028      | A_44_P603871  |
| A_44_P853102  | TC475064      | A_44_P853102  |
| A_44_P102962  | LOC291758     | A_44_P102962  |
| A_44_P506392  | Abce1         | A_44_P506392  |
| A_43_P15859   | Ocm           | A_43_P15859   |
| A_44_P639832  | TC502242      | A_44_P639832  |
| A_43_P11616   | Atf3          | A_43_P11616   |
| A_44_P916210  | TC495758      | A_44_P916210  |
| A_44_P837276  | ENSRNOT000000 | A_44_P837276  |
| A_42_P464974  | LOC315075     | A_42_P464974  |
| A_43_P12641   | Cldn1         | A_43_P12641   |
| A_44_P554454  | Txnrd1        | A_44_P554454  |
| A_44_P546537  | Nucb2         | A_44_P546537  |
| A_42_P639047  | 203054_Rn     | A_42_P639047  |
| A_42_P652897  | 243751_Rn     | A_42_P652897  |
| A_44_P575845  | ENSRNOT000000 | A_44_P575845  |
| A_44_P499287  | LOC291927     | A_44_P499287  |
| A_43_P12207   | Ddah1         | A_43_P12207   |
| A_44_P245941  | LOC296541     | A_44_P245941  |
| A_44_P1034030 | LOC303132     | A_44_P1034030 |
| A_44_P1016884 | BF566249      | A_44_P1016884 |
| A_44_P1014388 | LOC313108     | A_44_P1014388 |
| A_44_P245472  | LOC317163     | A_44_P245472  |
| A_44_P278439  | Ube2n         | A_44_P278439  |
| A_44_P220424  | LOC363386     | A_44_P220424  |
| A_44_P478144  | LOC290595     | A_44_P478144  |
| A_44_P372237  | MGC72611      | A_44_P372237  |
| A_44_P407573  | LOC365217     | A_44_P407573  |
| A_44_P393202  | BG670036      | A_44_P393202  |
| A_44_P1004323 | Col18a1       | A_44_P1004323 |
| A_44_P552533  | Upb1          | A_44_P552533  |
| A_43_P15638   | BE126741      | A_43_P15638   |
| A_42_P762829  | Cebpd         | A_42_P762829  |
| A_44_P398033  | Prnp          | A_44_P398033  |
| A_42_P568943  | 269716_Rn     | A_42_P568943  |
| A_44_P1004324 | Col18a1       | A_44_P1004324 |

|              |               |              |
|--------------|---------------|--------------|
| A_44_P557210 | Myo1b         | A_44_P557210 |
| A_42_P816427 | Wisp1         | A_42_P816427 |
| A_42_P603096 | Kcnj12        | A_42_P603096 |
| A_43_P12868  | Smpd3         | A_43_P12868  |
| A_44_P507448 | MGC109115     | A_44_P507448 |
| A_44_P283878 | LOC362228     | A_44_P283878 |
| A_44_P104985 | Pai2a         | A_44_P104985 |
| A_44_P393897 | MGC94648      | A_44_P393897 |
| A_44_P898713 | ENSRNOT000000 | A_44_P898713 |
| A_44_P899239 | TC476339      | A_44_P899239 |
| A_44_P137802 | Smpd1         | A_44_P137802 |
| A_44_P217761 | LOC360998     | A_44_P217761 |
| A_44_P142867 | LOC287114     | A_44_P142867 |
| A_42_P592144 | Fat           | A_42_P592144 |
| A_44_P184484 | Orc1l         | A_44_P184484 |
| A_44_P624280 | TC499303      | A_44_P624280 |
| A_44_P375502 | LOC314438     | A_44_P375502 |
| A_43_P16767  | CA512073      | A_43_P16767  |
| A_44_P140164 | LOC293880     | A_44_P140164 |
| A_42_P737844 | 284708_Rn     | A_42_P737844 |
| A_44_P242911 | Ecg2          | A_44_P242911 |
| A_44_P228942 | Aml1          | A_44_P228942 |
| A_43_P15819  | AJ005642.1    | A_43_P15819  |
| A_42_P460340 | 295150_Rn     | A_42_P460340 |
| A_44_P142201 | Ide           | A_44_P142201 |
| A_44_P412570 | LOC311783     | A_44_P412570 |
| A_43_P10498  | AI009167      | A_43_P10498  |
| A_44_P401955 | AW140738      | A_44_P401955 |
| A_42_P485243 | 253481_Rn     | A_42_P485243 |
| A_44_P430874 | Rab21         | A_44_P430874 |
| A_42_P508921 | Aqp3          | A_42_P508921 |
| A_44_P503562 | Gip           | A_44_P503562 |
| A_44_P344791 | LOC291608     | A_44_P344791 |
| A_44_P491217 | BF288942      | A_44_P491217 |
| A_42_P581863 | Pfn2          | A_42_P581863 |
| A_44_P623991 | TC496053      | A_44_P623991 |
| A_44_P242938 | LOC246252     | A_44_P242938 |
| A_44_P914438 | TC473591      | A_44_P914438 |
| A_44_P105741 | LOC288108     | A_44_P105741 |
| A_43_P19628  | CB546693      | A_43_P19628  |
| A_44_P789739 | AW917160      | A_44_P789739 |
| A_44_P192000 | LOC292793     | A_44_P192000 |
| A_43_P11621  | Cd44          | A_43_P11621  |
| A_42_P596050 | 298861_Rn     | A_42_P596050 |
| A_44_P373413 | Ppp1r7        | A_44_P373413 |
| A_42_P727584 | Mapk6         | A_42_P727584 |
| A_44_P867698 | ENSRNOT000000 | A_44_P867698 |
| A_44_P132533 | LOC288003     | A_44_P132533 |
| A_43_P14751  | Aqp9          | A_43_P14751  |
| A_44_P526425 | LOC365802     | A_44_P526425 |
| A_44_P230320 | Il1b          | A_44_P230320 |

|               |               |               |
|---------------|---------------|---------------|
| A_44_P546234  | LOC316493     | A_44_P546234  |
| A_44_P592221  | TC485141      | A_44_P592221  |
| A_44_P486304  | Ocil          | A_44_P486304  |
| A_44_P501818  | LOC363054     | A_44_P501818  |
| A_44_P378322  | AA858768      | A_44_P378322  |
| A_44_P1046554 | Ubqln1        | A_44_P1046554 |
| A_44_P320312  | LOC306526     | A_44_P320312  |
| A_42_P515405  | 384420_Rn     | A_42_P515405  |
| A_44_P212552  | Tob1          | A_44_P212552  |
| A_44_P741373  | BM390141      | A_44_P741373  |
| A_42_P598934  | 216697_Rn     | A_42_P598934  |
| A_44_P687400  | TC498596      | A_44_P687400  |
| A_44_P407259  | Usp2          | A_44_P407259  |
| A_43_P14163   | Odc1          | A_43_P14163   |
| A_44_P236738  | LOC299112     | A_44_P236738  |
| A_44_P262229  | Ppid          | A_44_P262229  |
| A_44_P499372  | LOC317213     | A_44_P499372  |
| A_44_P820421  | BF522212      | A_44_P820421  |
| A_44_P318255  | Comm3         | A_44_P318255  |
| A_43_P11499   | Rbp2          | A_43_P11499   |
| A_44_P1045526 | Piga          | A_44_P1045526 |
| A_43_P18277   | H32677        | A_43_P18277   |
| A_44_P261349  | AI009747      | A_44_P261349  |
| A_44_P265058  | LOC291137     | A_44_P265058  |
| A_43_P14894   | Nppb          | A_43_P14894   |
| A_42_P619403  | LOC361441     | A_42_P619403  |
| A_44_P554799  | Rab11a        | A_44_P554799  |
| A_43_P14036   | Nup155        | A_43_P14036   |
| A_44_P404064  | RM1           | A_44_P404064  |
| A_44_P385330  | BF545883      | A_44_P385330  |
| A_44_P836120  | BG670441      | A_44_P836120  |
| A_44_P466255  | LOC304506     | A_44_P466255  |
| A_44_P941132  | AW915892      | A_44_P941132  |
| A_42_P659546  | Actn1         | A_42_P659546  |
| A_44_P535434  | MGC105817     | A_44_P535434  |
| A_44_P548468  | Kif5b         | A_44_P548468  |
| A_44_P331765  | AW140738      | A_44_P331765  |
| A_44_P218023  | LOC295142     | A_44_P218023  |
| A_44_P339558  | Myo5b         | A_44_P339558  |
| A_44_P454532  | Ambp          | A_44_P454532  |
| A_44_P210120  | MGC105817     | A_44_P210120  |
| A_44_P687053  | ENSRNOT000000 | A_44_P687053  |
| A_44_P698293  | ENSRNOT000000 | A_44_P698293  |
| A_43_P20129   | CB545486      | A_43_P20129   |
| A_44_P227046  | LOC304987     | A_44_P227046  |
| A_44_P553751  | Avpi1         | A_44_P553751  |
| A_44_P394636  | Inpp5d        | A_44_P394636  |
| A_44_P696774  | AW141857      | A_44_P696774  |
| A_44_P137448  | Ptgs1         | A_44_P137448  |
| A_43_P15613   | BF407571      | A_43_P15613   |
| A_44_P576822  | TC483748      | A_44_P576822  |

|               |           |               |
|---------------|-----------|---------------|
| A_44_P461130  | Krt5      | A_44_P461130  |
| A_44_P388384  | AW144721  | A_44_P388384  |
| A_44_P419508  | LOC310291 | A_44_P419508  |
| A_44_P483111  | LOC309275 | A_44_P483111  |
| A_44_P519620  | LOC56723  | A_44_P519620  |
| A_42_P565621  | LOC289235 | A_42_P565621  |
| A_43_P14162   | A2m       | A_43_P14162   |
| A_44_P135277  | Alcam     | A_44_P135277  |
| A_44_P1012279 | LOC290842 | A_44_P1012279 |
| A_44_P224769  | LOC292848 | A_44_P224769  |
| A_44_P437203  | BG663446  | A_44_P437203  |
| A_44_P376624  | AW915941  | A_44_P376624  |
| A_44_P189299  | Ccnd1     | A_44_P189299  |
| A_44_P211182  | LOC363227 | A_44_P211182  |
| A_44_P301936  | Anxa3     | A_44_P301936  |
| A_44_P530813  | Casp3     | A_44_P530813  |
| A_42_P476269  | LOC294400 | A_42_P476269  |
| A_44_P141899  | Ppp1r2    | A_44_P141899  |
| A_44_P518576  | LOC288272 | A_44_P518576  |
| A_44_P244781  | AI411057  | A_44_P244781  |
| A_44_P1040999 | LOC300756 | A_44_P1040999 |
| A_44_P231448  | Flg       | A_44_P231448  |
| A_44_P234442  | LOC298867 | A_44_P234442  |
| A_44_P526661  | LOC306182 | A_44_P526661  |
| A_44_P1028551 | MGC105960 | A_44_P1028551 |
| A_44_P452492  | Hspa8     | A_44_P452492  |
| A_42_P473594  | Egr2      | A_42_P473594  |
| A_42_P606971  | Lat4      | A_42_P606971  |
| A_44_P458065  | Cd81      | A_44_P458065  |
| A_44_P445536  | LOC310399 | A_44_P445536  |
| A_44_P791682  | BC088291  | A_44_P791682  |
| A_44_P554795  | Rab11a    | A_44_P554795  |
| A_44_P958894  | LOC313017 | A_44_P958894  |
| A_44_P436604  | LOC288016 | A_44_P436604  |
| A_44_P239306  | LOC287938 | A_44_P239306  |
| A_44_P400421  | Csnk2b    | A_44_P400421  |
| A_44_P210116  | MGC105817 | A_44_P210116  |
| A_44_P575340  | Hprt      | A_44_P575340  |
| A_43_P21223   | CB546560  | A_43_P21223   |
| A_44_P156247  | Smu-1     | A_44_P156247  |
| A_43_P21719   | CB547029  | A_43_P21719   |
| A_44_P530211  | LOC362974 | A_44_P530211  |
| A_44_P135224  | Plk3      | A_44_P135224  |
| A_44_P260522  | LOC366382 | A_44_P260522  |
| A_44_P415034  | LOC298615 | A_44_P415034  |
| A_44_P554160  | Ppp1r7    | A_44_P554160  |
| A_44_P432314  | LOC313873 | A_44_P432314  |
| A_42_P759192  | 294800_Rn | A_42_P759192  |
| A_43_P10280   | AI102061  | A_43_P10280   |
| A_44_P1027405 | LOC363239 | A_44_P1027405 |
| A_44_P533172  | AI535535  | A_44_P533172  |

|               |               |               |
|---------------|---------------|---------------|
| A_42_P739860  | 293742_Rn     | A_42_P739860  |
| A_43_P12423   | Hif1a         | A_43_P12423   |
| A_44_P428507  | Slc35b2       | A_44_P428507  |
| A_44_P318722  | LOC302026     | A_44_P318722  |
| A_44_P1053383 | Rab7          | A_44_P1053383 |
| A_44_P209911  | Nopp140       | A_44_P209911  |
| A_44_P506817  | B4galt1       | A_44_P506817  |
| A_43_P14875   | Prep          | A_43_P14875   |
| A_44_P999845  | Sh3kbp1       | A_44_P999845  |
| A_44_P366005  | LOC302340     | A_44_P366005  |
| A_44_P449727  | Ttc12         | A_44_P449727  |
| A_44_P1028132 | BF564888      | A_44_P1028132 |
| A_44_P746365  | TC487054      | A_44_P746365  |
| A_44_P1028240 | LOC295498     | A_44_P1028240 |
| A_44_P1023146 | Gtf2b         | A_44_P1023146 |
| A_44_P454861  | LOC295698     | A_44_P454861  |
| A_44_P274605  | LOC366374     | A_44_P274605  |
| A_43_P15489   | NM_133311     | A_43_P15489   |
| A_42_P795269  | AW143025      | A_42_P795269  |
| A_43_P12125   | Junb          | A_43_P12125   |
| A_44_P226478  | XM_343643     | A_44_P226478  |
| A_42_P734384  | AW915327      | A_42_P734384  |
| A_44_P199447  | LOC362871     | A_44_P199447  |
| A_44_P286264  | LOC298399     | A_44_P286264  |
| A_44_P1004886 | MGC72614      | A_44_P1004886 |
| A_43_P12624   | Lxn           | A_43_P12624   |
| A_44_P1008738 | AI137483      | A_44_P1008738 |
| A_44_P461154  | Timp1         | A_44_P461154  |
| A_44_P415504  | CB547894      | A_44_P415504  |
| A_44_P760892  | Eif4g2        | A_44_P760892  |
| A_44_P760315  | ENSRNOT000000 | A_44_P760315  |
| A_44_P120608  | Cd24          | A_44_P120608  |
| A_43_P11082   | BF284739      | A_43_P11082   |
| A_43_P10466   | CA340030      | A_43_P10466   |
| A_44_P147443  | Ptp4a1        | A_44_P147443  |
| A_43_P12922   | Ubqln1        | A_43_P12922   |
| A_42_P778115  | 294024_Rn     | A_42_P778115  |
| A_44_P471217  | LOC302787     | A_44_P471217  |
| A_44_P121867  | LOC300332     | A_44_P121867  |
| A_44_P1011253 | LOC291556     | A_44_P1011253 |
| A_44_P499318  | LOC294294     | A_44_P499318  |
| A_44_P132610  | Slc20a1       | A_44_P132610  |
| A_42_P837214  | Mgmt          | A_42_P837214  |
| A_42_P752134  | Kpna2         | A_42_P752134  |
| A_42_P763224  | 291902_Rn     | A_42_P763224  |
| A_44_P522915  | LOC306432     | A_44_P522915  |
| A_44_P122386  | Hspb3         | A_44_P122386  |
| A_44_P335687  | LOC363120     | A_44_P335687  |
| A_44_P502287  | B4galt6       | A_44_P502287  |
| A_44_P232030  | LOC297826     | A_44_P232030  |
| A_44_P170351  | Vamp5         | A_44_P170351  |



|               |               |               |
|---------------|---------------|---------------|
| A_44_P527680  | LOC297911     | A_44_P527680  |
| A_44_P131031  | LOC361864     | A_44_P131031  |
| A_42_P509385  | 215940_Rn     | A_42_P509385  |
| A_44_P273989  | Ppp2ca        | A_44_P273989  |
| A_44_P405319  | LOC293711     | A_44_P405319  |
| A_44_P503868  | LOC310891     | A_44_P503868  |
| A_44_P363494  | LOC310383     | A_44_P363494  |
| A_44_P175807  | LOC317241     | A_44_P175807  |
| A_44_P511854  | CB605807      | A_44_P511854  |
| A_44_P354573  | LOC360564     | A_44_P354573  |
| A_43_P11577   | Anxa3         | A_43_P11577   |
| A_44_P462326  | LOC294799     | A_44_P462326  |
| A_42_P676304  | 200280_Rn     | A_42_P676304  |
| A_44_P365155  | Hprt          | A_44_P365155  |
| A_44_P1018865 | LOC302697     | A_44_P1018865 |
| A_44_P328292  | LOC360883     | A_44_P328292  |
| A_44_P533572  | Al639343      | A_44_P533572  |
| A_44_P1054213 | Hspa5         | A_44_P1054213 |
| A_43_P15701   | Rab13         | A_43_P15701   |
| A_44_P288828  | LOC287338     | A_44_P288828  |
| A_43_P17424   | CB545220      | A_43_P17424   |
| A_44_P1037342 | Cyp3a13       | A_44_P1037342 |
| A_44_P1040579 | Mpn           | A_44_P1040579 |
| A_44_P117216  | LOC314992     | A_44_P117216  |
| A_44_P416641  | Ywhaz         | A_44_P416641  |
| A_44_P1019245 | PAG608        | A_44_P1019245 |
| A_44_P1034201 | LOC360901     | A_44_P1034201 |
| A_44_P962790  | TC511567      | A_44_P962790  |
| A_44_P733362  | BC088292      | A_44_P733362  |
| A_44_P269652  | LOC310180     | A_44_P269652  |
| A_42_P632813  | 312413_Rn     | A_42_P632813  |
| A_42_P455982  | 205392_Rn     | A_42_P455982  |
| A_44_P387290  | MGC105817     | A_44_P387290  |
| A_44_P426107  | Akr1b8        | A_44_P426107  |
| A_44_P360600  | Olr803        | A_44_P360600  |
| A_44_P198716  | Pls3          | A_44_P198716  |
| A_42_P758052  | 288722_Rn     | A_42_P758052  |
| A_44_P591857  | TC480131      | A_44_P591857  |
| A_44_P272453  | LOC304125     | A_44_P272453  |
| A_44_P667364  | ENSRNOT000000 | A_44_P667364  |
| A_44_P459362  | LOC290280     | A_44_P459362  |
| A_44_P558119  | LOC315851     | A_44_P558119  |
| A_44_P506224  | LOC305824     | A_44_P506224  |
| A_44_P475744  | LOC294900     | A_44_P475744  |
| A_44_P667125  | ENSRNOT000000 | A_44_P667125  |
| A_44_P546040  | LOC310701     | A_44_P546040  |
| A_44_P652890  | TC474924      | A_44_P652890  |
| A_44_P375480  | LOC362622     | A_44_P375480  |
| A_44_P297383  | LOC360854     | A_44_P297383  |
| A_43_P17260   | CA511538      | A_43_P17260   |
| A_44_P160321  | XM_343643     | A_44_P160321  |

|               |               |               |
|---------------|---------------|---------------|
| A_44_P879764  | B4galt1       | A_44_P879764  |
| A_42_P543774  | 298524_Rn     | A_42_P543774  |
| A_44_P448286  | LOC367235     | A_44_P448286  |
| A_44_P1038341 | Hal           | A_44_P1038341 |
| A_43_P14144   | BQ207631      | A_43_P14144   |
| A_44_P137981  | LOC307465     | A_44_P137981  |
| A_43_P17061   | BM389990      | A_43_P17061   |
| A_42_P602724  | Ubd           | A_42_P602724  |
| A_44_P363204  | Csnk2a1       | A_44_P363204  |
| A_44_P591370  | TC470147      | A_44_P591370  |
| A_44_P136603  | LOC59114      | A_44_P136603  |
| A_44_P515825  | LOC362205     | A_44_P515825  |
| A_44_P122547  | Pdcd6ip       | A_44_P122547  |
| A_43_P16921   | CB605705      | A_43_P16921   |
| A_44_P242756  | Pcna          | A_44_P242756  |
| A_44_P555594  | LOC362273     | A_44_P555594  |
| A_43_P16703   | CA333739      | A_43_P16703   |
| A_44_P959399  | Sara1         | A_44_P959399  |
| A_43_P10933   | AW140738      | A_43_P10933   |
| A_43_P14882   | BQ207103      | A_43_P14882   |
| A_44_P107949  | LOC362666     | A_44_P107949  |
| A_44_P1047638 | LOC361089     | A_44_P1047638 |
| A_42_P514419  | 228435_Rn     | A_42_P514419  |
| A_44_P291264  | Sele          | A_44_P291264  |
| A_44_P621119  | ENSRNOT000000 | A_44_P621119  |
| A_44_P563970  | TC516213      | A_44_P563970  |
| A_42_P644278  | LOC293938     | A_42_P644278  |
| A_44_P994095  | LOC293454     | A_44_P994095  |
| A_44_P316962  | AI146082      | A_44_P316962  |
| A_44_P555253  | Hsj2          | A_44_P555253  |
| A_42_P787160  | Esp           | A_42_P787160  |
| A_43_P12619   | Nr4a3         | A_43_P12619   |
| A_42_P578953  | 288723_Rn     | A_42_P578953  |
| A_43_P16045   | AB072252.1    | A_43_P16045   |
| A_44_P220083  | LOC308999     | A_44_P220083  |
| A_43_P12806   | Ran           | A_43_P12806   |
| A_44_P187195  | C1galt1       | A_44_P187195  |
| A_44_P432109  | Txnl2         | A_44_P432109  |
| A_44_P180138  | H2b           | A_44_P180138  |
| A_44_P230851  | Anxa1         | A_44_P230851  |
| A_44_P379991  | LOC295660     | A_44_P379991  |
| A_44_P315022  | LOC298012     | A_44_P315022  |
| A_43_P11472   | Hmox1         | A_43_P11472   |
| A_44_P428997  | LOC310244     | A_44_P428997  |
| A_44_P325508  | Anxa3         | A_44_P325508  |
| A_42_P646075  | 429774_Rn     | A_42_P646075  |
| A_43_P19763   | AW526982      | A_43_P19763   |
| A_44_P1057707 | LOC289809     | A_44_P1057707 |
| A_44_P473273  | LOC360991     | A_44_P473273  |
| A_44_P953483  | TC462789      | A_44_P953483  |
| A_44_P372810  | LOC306464     | A_44_P372810  |

|               |               |               |
|---------------|---------------|---------------|
| A_44_P605002  | BF558513      | A_44_P605002  |
| A_44_P354255  | LOC290187     | A_44_P354255  |
| A_44_P430872  | Rab21         | A_44_P430872  |
| A_44_P273449  | LOC292949     | A_44_P273449  |
| A_44_P1027866 | LOC291874     | A_44_P1027866 |
| A_44_P363505  | LOC364624     | A_44_P363505  |
| A_44_P1040503 | Pctp          | A_44_P1040503 |
| A_43_P11481   | Me1           | A_43_P11481   |
| A_44_P1029956 | Cnn3          | A_44_P1029956 |
| A_44_P301863  | Gng12         | A_44_P301863  |
| A_44_P806862  | LOC361816     | A_44_P806862  |
| A_44_P158899  | Gpd2          | A_44_P158899  |
| A_44_P196291  | Lamp2         | A_44_P196291  |
| A_44_P262517  | LOC289113     | A_44_P262517  |
| A_44_P325791  | Ywhag         | A_44_P325791  |
| A_43_P11558   | Apod          | A_43_P11558   |
| A_44_P1018252 | Orc4l         | A_44_P1018252 |
| A_44_P127597  | Mdg1          | A_44_P127597  |
| A_44_P902718  | TC496731      | A_44_P902718  |
| A_44_P398492  | LOC307594     | A_44_P398492  |
| A_44_P148347  | AW916469      | A_44_P148347  |
| A_44_P1024113 | LOC293505     | A_44_P1024113 |
| A_44_P465233  | Fgfbp1        | A_44_P465233  |
| A_44_P135339  | Hspca         | A_44_P135339  |
| A_44_P116999  | LOC365006     | A_44_P116999  |
| A_43_P16778   | Al232346      | A_43_P16778   |
| A_43_P10133   | Al179448      | A_43_P10133   |
| A_44_P479520  | Eif4g2        | A_44_P479520  |
| A_44_P398167  | Prdx1         | A_44_P398167  |
| A_44_P513360  | LOC289993     | A_44_P513360  |
| A_44_P414829  | LOC290682     | A_44_P414829  |
| A_44_P885679  | TC494874      | A_44_P885679  |
| A_44_P1028282 | LOC297601     | A_44_P1028282 |
| A_44_P538816  | LOC364102     | A_44_P538816  |
| A_43_P17939   | BF405030      | A_43_P17939   |
| A_44_P253208  | LOC312566     | A_44_P253208  |
| A_44_P113933  | Tyms          | A_44_P113933  |
| A_44_P329909  | AW143475      | A_44_P329909  |
| A_44_P378315  | Srp54         | A_44_P378315  |
| A_44_P452024  | Bzw1          | A_44_P452024  |
| A_44_P335617  | LOC298648     | A_44_P335617  |
| A_44_P541165  | LOC293454     | A_44_P541165  |
| A_44_P806560  | ENSRNOT000000 | A_44_P806560  |
| A_44_P294675  | Sfn4          | A_44_P294675  |
| A_44_P1003072 | LOC297412     | A_44_P1003072 |
| A_44_P445044  | Verge         | A_44_P445044  |
| A_44_P855945  | TC464649      | A_44_P855945  |
| A_44_P932227  | TC508253      | A_44_P932227  |
| A_44_P259617  | CB545107      | A_44_P259617  |
| A_44_P978172  | TC515231      | A_44_P978172  |
| A_44_P869404  | TC486608      | A_44_P869404  |

|               |               |               |
|---------------|---------------|---------------|
| A_44_P407788  | LOC307084     | A_44_P407788  |
| A_44_P1049055 | OSP94         | A_44_P1049055 |
| A_44_P499076  | LOC309283     | A_44_P499076  |
| A_43_P12626   | Msln          | A_43_P12626   |
| A_44_P394150  | LOC300491     | A_44_P394150  |
| A_44_P821841  | ENSRNOT000000 | A_44_P821841  |
| A_44_P132614  | Slc20a1       | A_44_P132614  |
| A_44_P744488  | ENSRNOT000000 | A_44_P744488  |
| A_44_P364678  | BF550568      | A_44_P364678  |
| A_44_P139749  | Hrev107       | A_44_P139749  |
| A_44_P174365  | AW142013      | A_44_P174365  |
| A_44_P496853  | LOC290721     | A_44_P496853  |
| A_44_P805961  | ENSRNOT000000 | A_44_P805961  |
| A_44_P1058916 | Ephb2         | A_44_P1058916 |
| A_43_P15367   | NM_139189     | A_43_P15367   |
| A_43_P12417   | Hspa8         | A_43_P12417   |
| A_44_P713490  | ENSRNOT000000 | A_44_P713490  |
| A_44_P683965  | TC476767      | A_44_P683965  |
| A_44_P203514  | Eif4e         | A_44_P203514  |
| A_44_P242252  | Ube2d3        | A_44_P242252  |
| A_44_P606112  | ENSRNOT000000 | A_44_P606112  |
| A_44_P309266  | LOC290326     | A_44_P309266  |
| A_44_P396546  | Hspa8         | A_44_P396546  |
| A_44_P515360  | Scamp1        | A_44_P515360  |
| A_43_P13006   | Arfrp1        | A_43_P13006   |
| A_44_P342671  | LOC314540     | A_44_P342671  |
| A_44_P241498  | LOC298530     | A_44_P241498  |
| A_42_P780097  | 297715_Rn     | A_42_P780097  |
| A_44_P286409  | LOC315852     | A_44_P286409  |
| A_42_P603700  | LOC246266     | A_42_P603700  |
| A_44_P317250  | AA819034      | A_44_P317250  |
| A_44_P278688  | Yme1l1        | A_44_P278688  |
| A_44_P168184  | Ran           | A_44_P168184  |
| A_44_P276338  | Mcmd6         | A_44_P276338  |
| A_44_P476810  | BF286190      | A_44_P476810  |
| A_44_P105434  | LOC309858     | A_44_P105434  |
| A_43_P10931   | AA819659      | A_43_P10931   |
| A_43_P14210   | NM_172243     | A_43_P14210   |
| A_44_P993027  | Hrev107       | A_44_P993027  |
| A_44_P590280  | Galnt1        | A_44_P590280  |
| A_44_P443349  | LOC313163     | A_44_P443349  |
| A_44_P299389  | Eno1          | A_44_P299389  |
| A_43_P23215   | BF560542      | A_43_P23215   |
| A_44_P264292  | Maoa          | A_44_P264292  |
| A_44_P335247  | LOC309146     | A_44_P335247  |
| A_42_P723437  | MGC72984      | A_42_P723437  |
| A_44_P867900  | ENSRNOT000000 | A_44_P867900  |
| A_44_P713970  | ENSRNOT000000 | A_44_P713970  |
| A_44_P1033595 | LOC309187     | A_44_P1033595 |
| A_44_P117389  | Cyp2a2        | A_44_P117389  |
| A_44_P150317  | BF550562      | A_44_P150317  |

|               |               |               |
|---------------|---------------|---------------|
| A_44_P285530  | Eif2s2        | A_44_P285530  |
| A_44_P342334  | LOC294660     | A_44_P342334  |
| A_44_P175299  | Cyp2a2        | A_44_P175299  |
| A_44_P187083  | Atp2a2        | A_44_P187083  |
| A_44_P945669  | TC483539      | A_44_P945669  |
| A_44_P396409  | LOC299334     | A_44_P396409  |
| A_44_P358921  | Eif5          | A_44_P358921  |
| A_43_P10476   | BF554683      | A_43_P10476   |
| A_42_P501972  | 208082_Rn     | A_42_P501972  |
| A_44_P347283  | LOC366639     | A_44_P347283  |
| A_44_P1022458 | LOC307351     | A_44_P1022458 |
| A_44_P414460  | Arhe          | A_44_P414460  |
| A_44_P358492  | Fdft1         | A_44_P358492  |
| A_44_P901817  | TC510600      | A_44_P901817  |
| A_44_P513530  | LOC311598     | A_44_P513530  |
| A_44_P483288  | LOC287474     | A_44_P483288  |
| A_43_P10824   | BI296950      | A_43_P10824   |
| A_44_P499242  | LOC307492     | A_44_P499242  |
| A_44_P545426  | Slc16a1       | A_44_P545426  |
| A_44_P101211  | Mcl1          | A_44_P101211  |
| A_44_P346750  | Impa1         | A_44_P346750  |
| A_44_P916510  | TC499468      | A_44_P916510  |
| A_44_P683994  | TC477183      | A_44_P683994  |
| A_44_P247139  | AW142836      | A_44_P247139  |
| A_42_P694171  | 222746_Rn     | A_42_P694171  |
| A_42_P823777  | 298813_Rn     | A_42_P823777  |
| A_44_P182412  | cyclin E      | A_44_P182412  |
| A_44_P297619  | Cndp2         | A_44_P297619  |
| A_44_P959647  | ENSRNOT000000 | A_44_P959647  |
| A_42_P495428  | 324417_Rn     | A_42_P495428  |
| A_42_P840867  | 203973_Rn     | A_42_P840867  |
| A_44_P516160  | LOC301482     | A_44_P516160  |
| A_43_P15355   | NM_130755     | A_43_P15355   |
| A_42_P544135  | 324699_Rn     | A_42_P544135  |
| A_44_P1040854 | Spc21         | A_44_P1040854 |
| A_44_P149114  | Atp6b2        | A_44_P149114  |
| A_42_P781735  | Pin           | A_42_P781735  |
| A_44_P195648  | AW141137      | A_44_P195648  |
| A_44_P728923  | ENSRNOT000000 | A_44_P728923  |
| A_44_P1037110 | TC481392      | A_44_P1037110 |
| A_44_P312726  | BC079290      | A_44_P312726  |
| A_44_P153794  | Ostf1         | A_44_P153794  |
| A_44_P276607  | LOC309108     | A_44_P276607  |
| A_44_P121556  | LOC290686     | A_44_P121556  |
| A_44_P635423  | AW141130      | A_44_P635423  |
| A_44_P506313  | LOC306804     | A_44_P506313  |
| A_44_P420788  | Lypla1        | A_44_P420788  |
| A_44_P332734  | Psm3l         | A_44_P332734  |
| A_44_P356679  | LOC362614     | A_44_P356679  |
| A_44_P370645  | LOC298068     | A_44_P370645  |
| A_44_P1024739 | MGC94226      | A_44_P1024739 |

|               |               |               |
|---------------|---------------|---------------|
| A_44_P1011018 | LOC298342     | A_44_P1011018 |
| A_44_P215775  | LOC300672     | A_44_P215775  |
| A_44_P1028314 | TC486219      | A_44_P1028314 |
| A_44_P149412  | Ddxl          | A_44_P149412  |
| A_44_P541633  | LOC360462     | A_44_P541633  |
| A_44_P363559  | LOC291759     | A_44_P363559  |
| A_44_P441773  | Cdc37         | A_44_P441773  |
| A_44_P611921  | TC514380      | A_44_P611921  |
| A_42_P602511  | Kcnn4         | A_42_P602511  |
| A_44_P527480  | Ccna2         | A_44_P527480  |
| A_44_P1012606 | Nup50         | A_44_P1012606 |
| A_44_P806854  | TC463415      | A_44_P806854  |
| A_44_P403877  | AABR03024169  | A_44_P403877  |
| A_42_P490804  | Nap65         | A_42_P490804  |
| A_44_P346572  | Ssr1          | A_44_P346572  |
| A_44_P285463  | Cldn1         | A_44_P285463  |
| A_44_P157721  | Hspa8         | A_44_P157721  |
| A_42_P659466  | Raga          | A_42_P659466  |
| A_43_P18241   | BQ780873      | A_43_P18241   |
| A_44_P491909  | Eif4a1        | A_44_P491909  |
| A_43_P23474   | X94509        | A_43_P23474   |
| A_44_P354229  | LOC317233     | A_44_P354229  |
| A_44_P480344  | LOC292749     | A_44_P480344  |
| A_44_P650885  | AW141791      | A_44_P650885  |
| A_43_P12202   | Snx16         | A_43_P12202   |
| A_44_P306884  | LOC290691     | A_44_P306884  |
| A_44_P480749  | LOC368084     | A_44_P480749  |
| A_44_P577090  | TC486901      | A_44_P577090  |
| A_44_P178408  | LOC315074     | A_44_P178408  |
| A_43_P15962   | AF367448.1    | A_43_P15962   |
| A_44_P881475  | AA874941      | A_44_P881475  |
| A_43_P19921   | BF563299      | A_43_P19921   |
| A_44_P367926  | LOC289436     | A_44_P367926  |
| A_44_P639536  | TC499096      | A_44_P639536  |
| A_44_P307172  | Eif4a1        | A_44_P307172  |
| A_44_P289862  | Abhd6         | A_44_P289862  |
| A_43_P11152   | BU759691      | A_43_P11152   |
| A_44_P562556  | TC494322      | A_44_P562556  |
| A_44_P515275  | Cdkn1a        | A_44_P515275  |
| A_44_P975437  | BC083582      | A_44_P975437  |
| A_43_P19328   | BF394425      | A_43_P19328   |
| A_44_P1033359 | A_44_P1033359 | A_44_P1033359 |
| A_44_P285803  | Rs21c6        | A_44_P285803  |
| A_44_P210178  | Carhsp1       | A_44_P210178  |
| A_44_P808218  | TC489389      | A_44_P808218  |
| A_44_P482753  | LOC308890     | A_44_P482753  |
| A_44_P281761  | Eno1          | A_44_P281761  |
| A_44_P775787  | BC078951      | A_44_P775787  |
| A_44_P684795  | TC487987      | A_44_P684795  |
| A_44_P612439  | BQ204924      | A_44_P612439  |
| A_43_P13241   | NM_134334     | A_43_P13241   |

|               |               |               |
|---------------|---------------|---------------|
| A_44_P273990  | Ppp2ca        | A_44_P273990  |
| A_44_P836767  | ENSRNOT000000 | A_44_P836767  |
| A_44_P620480  | AW142507      | A_44_P620480  |
| A_44_P404071  | AW918599      | A_44_P404071  |
| A_42_P528007  | Srp54         | A_42_P528007  |
| A_42_P603585  | 205573_Rn     | A_42_P603585  |
| A_44_P312907  | Actn4         | A_44_P312907  |
| A_44_P1039760 | Tcte1l        | A_44_P1039760 |
| A_42_P565275  | 337565_Rn     | A_42_P565275  |
| A_43_P23129   | BF551144      | A_43_P23129   |
| A_44_P672457  | TC503599      | A_44_P672457  |
| A_44_P835675  | BF289360      | A_44_P835675  |
| A_44_P431577  | LOC366487     | A_44_P431577  |
| A_44_P520748  | Cad           | A_44_P520748  |
| A_44_P221650  | AI599077      | A_44_P221650  |
| A_44_P1009846 | LOC298513     | A_44_P1009846 |
| A_44_P900209  | TC488648      | A_44_P900209  |
| A_44_P481525  | Eif5          | A_44_P481525  |
| A_43_P10124   | CA506204      | A_43_P10124   |
| A_43_P11045   | CB606439      | A_43_P11045   |
| A_44_P356551  | LOC307916     | A_44_P356551  |
| A_44_P997586  | LOC310344     | A_44_P997586  |
| A_44_P1003969 | BF289772      | A_44_P1003969 |
| A_44_P947743  | TC513603      | A_44_P947743  |
| A_44_P513706  | LOC299084     | A_44_P513706  |
| A_44_P121374  | LOC288444     | A_44_P121374  |
| A_44_P213149  | LOC307169     | A_44_P213149  |
| A_44_P995132  | Pcna          | A_44_P995132  |
| A_44_P492772  | LOC290235     | A_44_P492772  |
| A_42_P581001  | S100a6        | A_42_P581001  |
| A_44_P291071  | LOC300807     | A_44_P291071  |
| A_44_P229661  | LOC362526     | A_44_P229661  |
| A_44_P426966  | LOC363070     | A_44_P426966  |
| A_44_P389544  | LOC362751     | A_44_P389544  |
| A_44_P247286  | ENSRNOT000000 | A_44_P247286  |
| A_44_P506017  | LOC291157     | A_44_P506017  |
| A_44_P111118  | AW920965      | A_44_P111118  |
| A_43_P16630   | BQ191086      | A_43_P16630   |
| A_44_P134287  | AI103474      | A_44_P134287  |
| A_44_P776390  | TC474385      | A_44_P776390  |
| A_44_P182386  | LOC367253     | A_44_P182386  |
| A_44_P833626  | AW915254      | A_44_P833626  |
| A_44_P848972  | AW915265      | A_44_P848972  |
| A_43_P17088   | AA956595      | A_43_P17088   |
| A_43_P17330   | AA963457      | A_43_P17330   |
| A_44_P405360  | MGC95134      | A_44_P405360  |
| A_44_P383411  | Psm3          | A_44_P383411  |
| A_44_P1003090 | LOC289809     | A_44_P1003090 |
| A_44_P975868  | TC482315      | A_44_P975868  |
| A_44_P436164  | LOC306575     | A_44_P436164  |
| A_44_P403521  | AA925469      | A_44_P403521  |

|               |              |               |
|---------------|--------------|---------------|
| A_44_P270330  | CA338808     | A_44_P270330  |
| A_44_P959890  | AABR03000060 | A_44_P959890  |
| A_44_P203106  | lfrd1        | A_44_P203106  |
| A_44_P1018147 | AB108669     | A_44_P1018147 |
| A_44_P119153  | LOC365419    | A_44_P119153  |
| A_44_P914760  | TC479160     | A_44_P914760  |
| A_44_P1012748 | LOC360549    | A_44_P1012748 |
| A_44_P334225  | CA510958     | A_44_P334225  |
| A_44_P501707  | LOC363317    | A_44_P501707  |
| A_44_P184865  | Ptp4a1       | A_44_P184865  |
| A_44_P245391  | Eif2s1       | A_44_P245391  |
| A_44_P484806  | Pcmt1        | A_44_P484806  |
| A_44_P304057  | Ppp2r2a      | A_44_P304057  |
| A_44_P520324  | LOC289155    | A_44_P520324  |
| A_44_P516003  | LOC298500    | A_44_P516003  |
| A_44_P838992  | TC490292     | A_44_P838992  |
| A_44_P1043943 | LOC361699    | A_44_P1043943 |
| A_42_P504250  | 292708_Rn    | A_42_P504250  |
| A_44_P126164  | LOC294046    | A_44_P126164  |
| A_44_P311693  | LOC364598    | A_44_P311693  |
| A_44_P248464  | LOC302313    | A_44_P248464  |
| A_44_P326124  | LOC307023    | A_44_P326124  |
| A_44_P746333  | TC486749     | A_44_P746333  |
| A_44_P256301  | Cktsf1b1     | A_44_P256301  |
| A_44_P306964  | LOC362138    | A_44_P306964  |
| A_44_P355493  | AW915744     | A_44_P355493  |
| A_42_P626033  | Txnl2        | A_42_P626033  |
| A_44_P351211  | Tdag         | A_44_P351211  |
| A_44_P166278  | MGC94168     | A_44_P166278  |
| A_44_P187815  | LOC367329    | A_44_P187815  |
| A_43_P15719   | CA509950     | A_43_P15719   |
| A_44_P134672  | LOC362537    | A_44_P134672  |
| A_43_P12535   | Tieg         | A_43_P12535   |
| A_44_P325479  | Ccnb1        | A_44_P325479  |
| A_44_P215602  | LOC294396    | A_44_P215602  |
| A_44_P314122  | LOC291461    | A_44_P314122  |
| A_42_P804387  | LOC60378     | A_42_P804387  |
| A_44_P550511  | Fbxo11       | A_44_P550511  |
| A_42_P615675  | H32128       | A_42_P615675  |
| A_44_P1019826 | LOC288040    | A_44_P1019826 |
| A_44_P348922  | Cebpb        | A_44_P348922  |
| A_44_P449858  | Krt21        | A_44_P449858  |
| A_44_P529562  | Slc30a1      | A_44_P529562  |
| A_44_P316898  | LOC287738    | A_44_P316898  |
| A_44_P334736  | Edn1         | A_44_P334736  |
| A_44_P468746  | LOC307351    | A_44_P468746  |
| A_42_P594613  | Dusp6        | A_42_P594613  |
| A_44_P1055467 | LOC302290    | A_44_P1055467 |
| A_44_P231719  | LOC293415    | A_44_P231719  |
| A_42_P664520  | Fen1         | A_42_P664520  |
| A_43_P16632   | AA901338     | A_43_P16632   |



|               |               |               |
|---------------|---------------|---------------|
| A_42_P536564  | 294599_Rn     | A_42_P536564  |
| A_44_P1047467 | LOC303824     | A_44_P1047467 |
| A_43_P11134   | BQ210920      | A_43_P11134   |
| A_44_P1027274 | A_44_P1027274 | A_44_P1027274 |
| A_44_P1012870 | LOC301381     | A_44_P1012870 |
| A_44_P349320  | LOC360961     | A_44_P349320  |
| A_43_P11066   | BE120644      | A_43_P11066   |
| A_44_P1060312 | LOC360853     | A_44_P1060312 |
| A_44_P652923  | TC475392      | A_44_P652923  |
| A_44_P999768  | AA944506      | A_44_P999768  |
| A_44_P133453  | LOC316125     | A_44_P133453  |
| A_42_P621826  | Tg            | A_42_P621826  |
| A_44_P808457  | TC491841      | A_44_P808457  |
| A_44_P223651  | LOC288353     | A_44_P223651  |
| A_42_P832028  | 217333_Rn     | A_42_P832028  |
| A_44_P1018447 | LOC288515     | A_44_P1018447 |
| A_44_P1040567 | Nme2          | A_44_P1040567 |
| A_44_P898364  | ENSRNOT000000 | A_44_P898364  |
| A_44_P221245  | AI599999      | A_44_P221245  |
| A_44_P494894  | Ttc1          | A_44_P494894  |
| A_44_P424367  | Hspa8         | A_44_P424367  |
| A_44_P475587  | LOC363854     | A_44_P475587  |
| A_44_P1046162 | LOC361816     | A_44_P1046162 |
| A_44_P269630  | LOC294694     | A_44_P269630  |
| A_44_P437945  | Bbc3          | A_44_P437945  |
| A_44_P147496  | LOC367428     | A_44_P147496  |
| A_44_P1036696 | Napg          | A_44_P1036696 |
| A_44_P543965  | LOC314676     | A_44_P543965  |
| A_44_P389438  | LOC302560     | A_44_P389438  |
| A_44_P142016  | Psen1         | A_44_P142016  |
| A_44_P257058  | Adamts1       | A_44_P257058  |
| A_43_P12753   | Pgam1         | A_43_P12753   |
| A_44_P1014383 | LOC315970     | A_44_P1014383 |
| A_44_P458074  | Id3           | A_44_P458074  |
| A_44_P339571  | Btg3          | A_44_P339571  |
| A_44_P597380  | TC479094      | A_44_P597380  |
| A_44_P1039994 | LOC293624     | A_44_P1039994 |
| A_44_P120635  | AW915837      | A_44_P120635  |
| A_44_P123818  | LOC294101     | A_44_P123818  |
| A_44_P171321  | MGC109115     | A_44_P171321  |
| A_44_P890431  | BF565662      | A_44_P890431  |
| A_43_P16644   | AW916035      | A_43_P16644   |
| A_44_P929020  | ENSRNOT000000 | A_44_P929020  |
| A_44_P976816  | TC493587      | A_44_P976816  |
| A_44_P960947  | TC485895      | A_44_P960947  |
| A_44_P438492  | LOC306526     | A_44_P438492  |
| A_44_P461912  | LOC313304     | A_44_P461912  |
| A_44_P334442  | AI060241      | A_44_P334442  |
| A_44_P1019710 | LOC291733     | A_44_P1019710 |
| A_44_P211015  | LOC302827     | A_44_P211015  |
| A_43_P12430   | Gcdp          | A_43_P12430   |

|               |               |               |
|---------------|---------------|---------------|
| A_42_P707230  | Rcn2          | A_42_P707230  |
| A_44_P352079  | LOC367074     | A_44_P352079  |
| A_44_P245916  | MGC95031      | A_44_P245916  |
| A_42_P502671  | 295818_Rn     | A_42_P502671  |
| A_44_P555886  | LOC367293     | A_44_P555886  |
| A_42_P550360  | KLK8          | A_42_P550360  |
| A_44_P468573  | LOC289517     | A_44_P468573  |
| A_44_P546459  | Psm12         | A_44_P546459  |
| A_44_P330717  | LOC294844     | A_44_P330717  |
| A_44_P776282  | TC471488      | A_44_P776282  |
| A_42_P620762  | Atf4          | A_42_P620762  |
| A_44_P962936  | TC514196      | A_44_P962936  |
| A_44_P184685  | Sertad1       | A_44_P184685  |
| A_44_P267541  | LOC302371     | A_44_P267541  |
| A_44_P958966  | ENSRNOT000000 | A_44_P958966  |
| A_44_P129009  | AA957332      | A_44_P129009  |
| A_44_P108588  | Fst           | A_44_P108588  |
| A_42_P704824  | 284985_Rn     | A_42_P704824  |
| A_44_P320274  | AA850031      | A_44_P320274  |
| A_44_P386225  | Mgp           | A_44_P386225  |
| A_44_P116176  | LOC315989     | A_44_P116176  |
| A_44_P423281  | BF545627      | A_44_P423281  |
| A_43_P15775   | U21719.1      | A_43_P15775   |
| A_44_P477577  | Rab1          | A_44_P477577  |
| A_42_P526712  | 199891_Rn     | A_42_P526712  |
| A_44_P1059422 | Actr2         | A_44_P1059422 |
| A_44_P992502  | LOC310399     | A_44_P992502  |
| A_44_P636724  | ENSRNOT000000 | A_44_P636724  |
| A_44_P915624  | TC489344      | A_44_P915624  |
| A_44_P454890  | LOC288898     | A_44_P454890  |
| A_42_P467037  | Prkr          | A_42_P467037  |
| A_44_P346931  | LOC360992     | A_44_P346931  |
| A_44_P399992  | Prkar1a       | A_44_P399992  |
| A_42_P632078  | 217029_Rn     | A_42_P632078  |
| A_43_P14887   | Dlx5          | A_43_P14887   |
| A_44_P1028007 | Clic1         | A_44_P1028007 |
| A_44_P844819  | BE106220      | A_44_P844819  |
| A_44_P1024567 | TC468818      | A_44_P1024567 |
| A_44_P225493  | Usp15         | A_44_P225493  |
| A_44_P256003  | BQ208148      | A_44_P256003  |
| A_42_P743825  | LOC287716     | A_42_P743825  |
| A_44_P667238  | LOC287768     | A_44_P667238  |
| A_43_P22672   | BE116198      | A_43_P22672   |
| A_42_P620591  | LOC288669     | A_42_P620591  |
| A_42_P765499  | 223044_Rn     | A_42_P765499  |
| A_44_P401170  | LOC360698     | A_44_P401170  |
| A_43_P11320   | BQ204181      | A_43_P11320   |
| A_44_P339898  | LOC304542     | A_44_P339898  |
| A_44_P393985  | LOC298169     | A_44_P393985  |
| A_44_P824032  | TC494055      | A_44_P824032  |
| A_44_P1028012 | LOC361792     | A_44_P1028012 |

|               |           |               |
|---------------|-----------|---------------|
| A_44_P501483  | LOC310385 | A_44_P501483  |
| A_44_P998015  | AW915543  | A_44_P998015  |
| A_42_P580844  | Cdc2a     | A_42_P580844  |
| A_43_P17933   | BF394175  | A_43_P17933   |
| A_44_P285390  | Atp6v1d   | A_44_P285390  |
| A_44_P525600  | Timm8a    | A_44_P525600  |
| A_44_P975743  | TC480469  | A_44_P975743  |
| A_44_P426407  | LOC364720 | A_44_P426407  |
| A_44_P837580  | Hsj2      | A_44_P837580  |
| A_44_P667109  | BC081964  | A_44_P667109  |
| A_44_P299136  | LOC361866 | A_44_P299136  |
| A_42_P507857  | 202677_Rn | A_42_P507857  |
| A_44_P1045960 | Gng5      | A_44_P1045960 |
| A_44_P1034926 | BF281925  | A_44_P1034926 |
| A_43_P14871   | Ltbp1     | A_43_P14871   |
| A_44_P1007131 | Mipp65    | A_44_P1007131 |
| A_43_P12384   | Birc2     | A_43_P12384   |
| A_44_P119577  | LOC367151 | A_44_P119577  |
| A_44_P528721  | AI230806  | A_44_P528721  |
| A_44_P149734  | Hat1      | A_44_P149734  |
| A_44_P1014379 | LOC315970 | A_44_P1014379 |
| A_44_P193181  | Gapd      | A_44_P193181  |
| A_44_P269125  | Taf9      | A_44_P269125  |
| A_44_P407138  | Nme1      | A_44_P407138  |
| A_44_P415518  | LOC63880  | A_44_P415518  |
| A_44_P170496  | LOC362292 | A_44_P170496  |
| A_42_P463880  | 221054_Rn | A_42_P463880  |
| A_44_P470096  | AI501238  | A_44_P470096  |
| A_44_P881750  | AW144410  | A_44_P881750  |
| A_44_P1058179 | TC484544  | A_44_P1058179 |
| A_44_P370335  | LOC289707 | A_44_P370335  |
| A_44_P222011  | MRLCB     | A_44_P222011  |
| A_44_P301963  | Psmb9     | A_44_P301963  |
| A_44_P321110  | LOC293484 | A_44_P321110  |
| A_44_P1044046 | LOC296086 | A_44_P1044046 |
| A_44_P370385  | LOC290370 | A_44_P370385  |
| A_44_P118137  | BF544951  | A_44_P118137  |
| A_42_P622837  | LOC287593 | A_42_P622837  |
| A_44_P139075  | Txnl1     | A_44_P139075  |
| A_42_P682589  | Nr4a1     | A_42_P682589  |
| A_42_P570394  | 250950_Rn | A_42_P570394  |
| A_44_P208021  | Olr1452   | A_44_P208021  |
| A_44_P320655  | F2r       | A_44_P320655  |
| A_43_P12879   | ldh3a     | A_43_P12879   |
| A_44_P920111  | TC491151  | A_44_P920111  |
| A_44_P340393  | LOC299750 | A_44_P340393  |
| A_44_P176003  | Hn1l      | A_44_P176003  |
| A_44_P269697  | LOC295278 | A_44_P269697  |
| A_44_P490159  | LOC315549 | A_44_P490159  |
| A_44_P513148  | Kis       | A_44_P513148  |
| A_44_P386374  | Mapk1     | A_44_P386374  |

|               |           |               |
|---------------|-----------|---------------|
| A_42_P817417  | Tage4     | A_42_P817417  |
| A_44_P140514  | LOC298850 | A_44_P140514  |
| A_44_P386375  | Mapk1     | A_44_P386375  |
| A_44_P105476  | LOC302804 | A_44_P105476  |
| A_42_P597258  | 413174_Rn | A_42_P597258  |
| A_42_P675802  | 295375_Rn | A_42_P675802  |
| A_44_P398753  | LOC314879 | A_44_P398753  |
| A_44_P1053321 | Gbp2      | A_44_P1053321 |
| A_42_P673212  | 296517_Rn | A_42_P673212  |
| A_44_P302928  | AA899565  | A_44_P302928  |
| A_44_P255294  | LOC293408 | A_44_P255294  |
| A_43_P11306   | BE115624  | A_43_P11306   |
| A_44_P1056383 | LOC301419 | A_44_P1056383 |
| A_44_P730251  | TC482933  | A_44_P730251  |
| A_44_P299086  | AI112947  | A_44_P299086  |
| A_44_P135238  | Wnt7a     | A_44_P135238  |
| A_44_P591963  | TC481735  | A_44_P591963  |
| A_44_P359052  | LOC314405 | A_44_P359052  |
| A_43_P16537   | CB545224  | A_43_P16537   |
| A_44_P226941  | Plm       | A_44_P226941  |
| A_44_P159004  | LOC289172 | A_44_P159004  |
| A_42_P760177  | 222188_Rn | A_42_P760177  |
| A_42_P518855  | Bcl2a1    | A_42_P518855  |
| A_44_P219092  | AW141388  | A_44_P219092  |
| A_44_P480353  | LOC361563 | A_44_P480353  |
| A_44_P837560  | TC462241  | A_44_P837560  |
| A_44_P105899  | BI289678  | A_44_P105899  |
| A_43_P18315   | CB605887  | A_43_P18315   |
| A_44_P257221  | Atp6b2    | A_44_P257221  |
| A_42_P692476  | 223093_Rn | A_42_P692476  |
| A_42_P729340  | 384548_Rn | A_42_P729340  |
| A_44_P260285  | LOC364457 | A_44_P260285  |
| A_44_P241230  | LOC299251 | A_44_P241230  |
| A_43_P12739   | Pawr      | A_43_P12739   |
| A_44_P220305  | LOC311431 | A_44_P220305  |
| A_44_P216395  | Gadd45a   | A_44_P216395  |
| A_44_P309398  | LOC311371 | A_44_P309398  |
| A_44_P398462  | LOC291065 | A_44_P398462  |
| A_44_P248542  | LOC298960 | A_44_P248542  |
| A_44_P488594  | BC086430  | A_44_P488594  |
| A_44_P942315  | Tgfb1i4   | A_44_P942315  |
| A_44_P1034346 | LOC296315 | A_44_P1034346 |
| A_44_P1006334 | Psm6      | A_44_P1006334 |
| A_44_P241321  | LOC362161 | A_44_P241321  |
| A_44_P450361  | LOC305764 | A_44_P450361  |
| A_44_P175719  | LOC296290 | A_44_P175719  |
| A_44_P385014  | BF548328  | A_44_P385014  |
| A_42_P835665  | 204088_Rn | A_42_P835665  |
| A_44_P655056  | TC500474  | A_44_P655056  |
| A_44_P534089  | Ccnb1     | A_44_P534089  |
| A_44_P473234  | LOC293511 | A_44_P473234  |

|               |               |               |
|---------------|---------------|---------------|
| A_44_P226908  | Ywhah         | A_44_P226908  |
| A_44_P809189  | ENSRNOT000000 | A_44_P809189  |
| A_44_P111368  | AA996838      | A_44_P111368  |
| A_44_P248133  | LOC304983     | A_44_P248133  |
| A_43_P11257   | BQ203725      | A_43_P11257   |
| A_43_P10604   | BE111651      | A_43_P10604   |
| A_44_P191784  | Calm1         | A_44_P191784  |
| A_44_P266705  | LOC361137     | A_44_P266705  |
| A_44_P228599  | LOC310710     | A_44_P228599  |
| A_44_P182555  | Mapre1        | A_44_P182555  |
| A_44_P316273  | LOC288428     | A_44_P316273  |
| A_44_P443138  | LOC306428     | A_44_P443138  |
| A_44_P1058445 | Hprt          | A_44_P1058445 |
| A_44_P470149  | AI511259      | A_44_P470149  |
| A_44_P1005213 | LOC304951     | A_44_P1005213 |
| A_44_P321089  | LOC289198     | A_44_P321089  |
| A_44_P384688  | LOC315370     | A_44_P384688  |
| A_44_P991273  | LOC298012     | A_44_P991273  |
| A_44_P209459  | Pafah1b2      | A_44_P209459  |
| A_44_P521687  | Dnaja2        | A_44_P521687  |
| A_42_P693821  | Fosl1         | A_42_P693821  |
| A_44_P515326  | Dgat1         | A_44_P515326  |
| A_44_P266454  | MGC94464      | A_44_P266454  |
| A_44_P304542  | LOC360973     | A_44_P304542  |
| A_44_P1054864 | Arcn1         | A_44_P1054864 |
| A_44_P166233  | LOC307263     | A_44_P166233  |
| A_44_P944375  | ENSRNOT000000 | A_44_P944375  |
| A_44_P997825  | Myd116        | A_44_P997825  |
| A_44_P1019604 | LOC296368     | A_44_P1019604 |
| A_42_P531684  | 226209_Rn     | A_42_P531684  |
| A_44_P122644  | AI044806      | A_44_P122644  |
| A_44_P277669  | AI144623      | A_44_P277669  |
| A_44_P901088  | TC498426      | A_44_P901088  |
| A_44_P531511  | LOC287191     | A_44_P531511  |
| A_43_P18537   | CB548133      | A_43_P18537   |
| A_44_P307633  | LOC311886     | A_44_P307633  |
| A_44_P1037041 | LOC313022     | A_44_P1037041 |
| A_44_P329925  | AW143515      | A_44_P329925  |
| A_43_P10006   | BQ781225      | A_43_P10006   |
| A_44_P173516  | LOC314309     | A_44_P173516  |
| A_44_P1029770 | Nol5a         | A_44_P1029770 |
| A_44_P1043081 | AW142368      | A_44_P1043081 |
| A_43_P11971   | Cd47          | A_43_P11971   |
| A_44_P131133  | LOC366576     | A_44_P131133  |
| A_44_P787241  | BG671341      | A_44_P787241  |
| A_43_P12531   | TCEB2         | A_43_P12531   |
| A_42_P793807  | 217778_Rn     | A_42_P793807  |
| A_42_P656837  | 298301_Rn     | A_42_P656837  |
| A_44_P405183  | ENSRNOT000000 | A_44_P405183  |
| A_44_P481017  | LOC364903     | A_44_P481017  |
| A_44_P582605  | BF543360      | A_44_P582605  |

|               |               |               |
|---------------|---------------|---------------|
| A_42_P532103  | Anxa2         | A_42_P532103  |
| A_44_P168083  | Tegt          | A_44_P168083  |
| A_44_P654444  | TC493857      | A_44_P654444  |
| A_44_P316374  | LOC289673     | A_44_P316374  |
| A_42_P752796  | 292052_Rn     | A_42_P752796  |
| A_44_P671422  | TC465069      | A_44_P671422  |
| A_44_P288224  | Serpina12     | A_44_P288224  |
| A_44_P486760  | LOC304766     | A_44_P486760  |
| A_44_P456852  | Ddx1          | A_44_P456852  |
| A_44_P107139  | Mark3         | A_44_P107139  |
| A_44_P347981  | AW433572      | A_44_P347981  |
| A_44_P166133  | LOC290772     | A_44_P166133  |
| A_44_P366192  | LOC367253     | A_44_P366192  |
| A_44_P110419  | LOC316643     | A_44_P110419  |
| A_44_P633002  | AI556201      | A_44_P633002  |
| A_44_P471819  | LOC307383     | A_44_P471819  |
| A_44_P517686  | TOM70         | A_44_P517686  |
| A_42_P810736  | Timeless      | A_42_P810736  |
| A_42_P552143  | Cfl1          | A_42_P552143  |
| A_42_P840087  | 205880_Rn     | A_42_P840087  |
| A_42_P667914  | 219279_Rn     | A_42_P667914  |
| A_44_P1008811 | CA510958      | A_44_P1008811 |
| A_44_P363377  | Gapd          | A_44_P363377  |
| A_44_P1004150 | LOC362779     | A_44_P1004150 |
| A_44_P612762  | AW920702      | A_44_P612762  |
| A_43_P13176   | NM_133406     | A_43_P13176   |
| A_43_P13327   | NM_138895     | A_43_P13327   |
| A_44_P140532  | LOC366634     | A_44_P140532  |
| A_44_P130513  | RT1-Db1       | A_44_P130513  |
| A_44_P286888  | Vapa          | A_44_P286888  |
| A_43_P10744   | H31541        | A_43_P10744   |
| A_44_P267809  | LOC287878     | A_44_P267809  |
| A_44_P328489  | LOC291736     | A_44_P328489  |
| A_44_P508239  | Shmt1         | A_44_P508239  |
| A_44_P411505  | Ccnd1         | A_44_P411505  |
| A_44_P438641  | LOC300303     | A_44_P438641  |
| A_42_P577458  | Psmb2         | A_42_P577458  |
| A_44_P197041  | LOC298792     | A_44_P197041  |
| A_42_P576621  | 220619_Rn     | A_42_P576621  |
| A_44_P451916  | Tap1          | A_44_P451916  |
| A_42_P577421  | LOC300691     | A_42_P577421  |
| A_44_P260046  | LOC306964     | A_44_P260046  |
| A_44_P607062  | AA859497      | A_44_P607062  |
| A_42_P722870  | 298196_Rn     | A_42_P722870  |
| A_44_P419645  | LOC307779     | A_44_P419645  |
| A_44_P693682  | A_44_P693682  | A_44_P693682  |
| A_44_P546419  | LOC303074     | A_44_P546419  |
| A_44_P913530  | ENSRNOT000000 | A_44_P913530  |
| A_44_P391784  | LOC302797     | A_44_P391784  |
| A_44_P425367  | BC081947      | A_44_P425367  |
| A_44_P170070  | AW143028      | A_44_P170070  |

|               |               |               |
|---------------|---------------|---------------|
| A_44_P419898  | LOC287099     | A_44_P419898  |
| A_42_P703647  | LOC362638     | A_42_P703647  |
| A_44_P991616  | Ube1dc1       | A_44_P991616  |
| A_44_P405768  | LOC367176     | A_44_P405768  |
| A_44_P180627  | LOC301748     | A_44_P180627  |
| A_44_P1058389 | Npm1          | A_44_P1058389 |
| A_44_P405321  | LOC293876     | A_44_P405321  |
| A_43_P11226   | BQ207420      | A_43_P11226   |
| A_44_P217715  | LOC360891     | A_44_P217715  |
| A_44_P455206  | LOC287618     | A_44_P455206  |
| A_44_P996393  | Mgat2         | A_44_P996393  |
| A_44_P254767  | Gss           | A_44_P254767  |
| A_44_P475804  | LOC364696     | A_44_P475804  |
| A_44_P929254  | ENSRNOT000000 | A_44_P929254  |
| A_43_P19361   | CB605819      | A_43_P19361   |
| A_44_P333281  | LOC301792     | A_44_P333281  |
| A_44_P295548  | LOC315007     | A_44_P295548  |
| A_43_P12519   | S100A10       | A_43_P12519   |
| A_44_P215711  | LOC298511     | A_44_P215711  |
| A_44_P575300  | LOC289434     | A_44_P575300  |
| A_44_P1003517 | MGC72968      | A_44_P1003517 |
| A_44_P229376  | Sdad1         | A_44_P229376  |
| A_44_P501082  | Rap1b         | A_44_P501082  |
| A_44_P1019324 | Eif4a1        | A_44_P1019324 |
| A_44_P124099  | LOC367899     | A_44_P124099  |
| A_44_P1019326 | Eif4a1        | A_44_P1019326 |
| A_44_P1055774 | AA923925      | A_44_P1055774 |
| A_44_P185324  | LOC313806     | A_44_P185324  |
| A_44_P384389  | LOC293174     | A_44_P384389  |
| A_44_P397441  | LOC287703     | A_44_P397441  |
| A_44_P197981  | AA964368      | A_44_P197981  |
| A_44_P736091  | BQ202972      | A_44_P736091  |
| A_43_P11897   | Gabrd         | A_43_P11897   |
| A_44_P496454  | TCEB2         | A_44_P496454  |
| A_44_P710235  | AW914549      | A_44_P710235  |
| A_44_P250816  | LOC297811     | A_44_P250816  |
| A_42_P824217  | 292840_Rn     | A_42_P824217  |
| A_44_P334494  | BF564921      | A_44_P334494  |
| A_44_P420640  | AW915551      | A_44_P420640  |
| A_44_P483212  | LOC299909     | A_44_P483212  |
| A_44_P990713  | LOC363134     | A_44_P990713  |
| A_44_P310787  | AW144345      | A_44_P310787  |
| A_44_P318891  | LOC310585     | A_44_P318891  |
| A_43_P17716   | CB545120      | A_43_P17716   |
| A_44_P291114  | LOC316051     | A_44_P291114  |
| A_44_P608318  | TC494656      | A_44_P608318  |
| A_44_P896602  | AA964547      | A_44_P896602  |
| A_42_P612834  | 216811_Rn     | A_42_P612834  |
| A_44_P1017841 | LOC362912     | A_44_P1017841 |
| A_44_P140615  | LOC362989     | A_44_P140615  |
| A_44_P361487  | Hba1          | A_44_P361487  |

|               |                |               |
|---------------|----------------|---------------|
| A_44_P742272  | AW144474       | A_44_P742272  |
| A_44_P118777  | Olr1433        | A_44_P118777  |
| A_44_P114308  | Hspca          | A_44_P114308  |
| A_44_P995887  | TC479248       | A_44_P995887  |
| A_44_P164007  | LOC362736      | A_44_P164007  |
| A_44_P329239  | AA858471       | A_44_P329239  |
| A_44_P472989  | Ptgs2          | A_44_P472989  |
| A_44_P1071434 | CDK3           | A_44_P1071434 |
| A_44_P898105  | ENSRNOT000000  | A_44_P898105  |
| A_44_P1046205 | LOC298144      | A_44_P1046205 |
| A_44_P520382  | LOC474154      | A_44_P520382  |
| A_43_P14565   | BU758374       | A_43_P14565   |
| A_43_P10854   | BG377688       | A_43_P10854   |
| A_44_P700164  | TC485634       | A_44_P700164  |
| A_44_P472791  | Nup107         | A_44_P472791  |
| A_44_P527726  | LOC363388      | A_44_P527726  |
| A_43_P12613   | Apel-pending   | A_43_P12613   |
| A_44_P383992  | Olr821         | A_44_P383992  |
| A_44_P959202  | AI071855       | A_44_P959202  |
| A_44_P1026651 | Itm2b          | A_44_P1026651 |
| A_44_P339867  | Ssr4           | A_44_P339867  |
| A_44_P182847  | LOC291171      | A_44_P182847  |
| A_44_P1007008 | LOC295704      | A_44_P1007008 |
| A_44_P212826  | Ero1l          | A_44_P212826  |
| A_42_P602472  | 217069_Rn      | A_42_P602472  |
| A_44_P116172  | LOC315989      | A_44_P116172  |
| A_44_P948572  | TC497172       | A_44_P948572  |
| A_44_P121781  | LOC363321      | A_44_P121781  |
| A_44_P415854  | BE118386       | A_44_P415854  |
| A_44_P484902  | Pitpn          | A_44_P484902  |
| A_43_P17221   | BF281809       | A_43_P17221   |
| A_44_P351947  | LOC302332      | A_44_P351947  |
| A_44_P776708  | TC479700       | A_44_P776708  |
| A_42_P721011  | Psma5          | A_42_P721011  |
| A_44_P283899  | LOC365007      | A_44_P283899  |
| A_44_P440756  | LOC309163      | A_44_P440756  |
| A_44_P121511  | LOC364278      | A_44_P121511  |
| A_44_P159561  | LOC288330      | A_44_P159561  |
| A_44_P398300  | MGC94288       | A_44_P398300  |
| A_44_P269596  | LOC365388      | A_44_P269596  |
| A_44_P482519  | Itgb7          | A_44_P482519  |
| A_44_P310168  | Tgfa           | A_44_P310168  |
| A_44_P151574  | Olr1401        | A_44_P151574  |
| A_44_P384223  | Arf4           | A_44_P384223  |
| A_42_P614711  | 217596_Rn      | A_42_P614711  |
| A_44_P113096  | Nrasp          | A_44_P113096  |
| A_44_P312103  | LOC301555      | A_44_P312103  |
| A_44_P192336  | LOC312728      | A_44_P192336  |
| A_43_P19059   | AM:ARG11-02794 | A_43_P19059   |
| A_44_P994027  | LOC292766      | A_44_P994027  |
| A_44_P759995  | ENSRNOT000000  | A_44_P759995  |



|               |               |               |
|---------------|---------------|---------------|
| A_42_P777285  | 218650_Rn     | A_42_P777285  |
| A_43_P11689   | Ppp1cb        | A_43_P11689   |
| A_44_P370355  | LOC305639     | A_44_P370355  |
| A_44_P540279  | AW144704      | A_44_P540279  |
| A_44_P277775  | AI105643      | A_44_P277775  |
| A_44_P157123  | LOC363090     | A_44_P157123  |
| A_44_P189917  | LOC311571     | A_44_P189917  |
| A_44_P1056788 | LOC287936     | A_44_P1056788 |
| A_44_P344777  | LOC311121     | A_44_P344777  |
| A_43_P12964   | Plaa          | A_43_P12964   |
| A_44_P480636  | ZD10B         | A_44_P480636  |
| A_44_P529403  | MGC94895      | A_44_P529403  |
| A_44_P335415  | LOC317168     | A_44_P335415  |
| A_44_P296561  | BG668164      | A_44_P296561  |
| A_44_P775932  | ENSRNOT000000 | A_44_P775932  |
| A_44_P201389  | LOC289990     | A_44_P201389  |
| A_44_P224489  | MGC93921      | A_44_P224489  |
| A_42_P527070  | 219539_Rn     | A_42_P527070  |
| A_42_P755546  | 326529_Rn     | A_42_P755546  |
| A_44_P187080  | Atp2a2        | A_44_P187080  |
| A_42_P694161  | 297141_Rn     | A_42_P694161  |
| A_44_P230640  | Pafah1b1      | A_44_P230640  |
| A_43_P20541   | CB545864      | A_43_P20541   |
| A_44_P518380  | MGC94463      | A_44_P518380  |
| A_43_P12802   | Ufd1l         | A_43_P12802   |
| A_42_P511401  | 219437_Rn     | A_42_P511401  |
| A_44_P538531  | Pitpnb        | A_44_P538531  |
| A_43_P10662   | AI101462      | A_43_P10662   |
| A_44_P852513  | ENSRNOT000000 | A_44_P852513  |
| A_44_P213139  | LOC291190     | A_44_P213139  |
| A_43_P10069   | BQ208294      | A_43_P10069   |
| A_43_P17131   | AW253721      | A_43_P17131   |
| A_42_P799390  | 298760_Rn     | A_42_P799390  |
| A_44_P387207  | LOC366645     | A_44_P387207  |
| A_44_P715937  | TC491880      | A_44_P715937  |
| A_44_P1056810 | PSMD1         | A_44_P1056810 |
| A_44_P255985  | LOC290939     | A_44_P255985  |
| A_44_P171285  | LOC300050     | A_44_P171285  |
| A_44_P493688  | MGC105864     | A_44_P493688  |
| A_44_P899810  | TC484013      | A_44_P899810  |
| A_44_P621378  | ENSRNOT000000 | A_44_P621378  |
| A_44_P285517  | LOC282834     | A_44_P285517  |
| A_44_P1035353 | TC470302      | A_44_P1035353 |
| A_42_P479920  | 216044_Rn     | A_42_P479920  |
| A_43_P12029   | Rgs5          | A_43_P12029   |
| A_44_P541074  | Ragb          | A_44_P541074  |
| A_42_P460609  | Gef2          | A_42_P460609  |
| A_44_P620300  | BG671963      | A_44_P620300  |
| A_44_P267265  | LOC309224     | A_44_P267265  |
| A_44_P997578  | AI407429      | A_44_P997578  |
| A_44_P201585  | LOC362293     | A_44_P201585  |

|               |               |               |
|---------------|---------------|---------------|
| A_42_P539352  | Gp110-pending | A_42_P539352  |
| A_44_P145152  | LOC299558     | A_44_P145152  |
| A_44_P104069  | LOC287273     | A_44_P104069  |
| A_44_P304349  | ENSRNOT000000 | A_44_P304349  |
| A_44_P444339  | AW142434      | A_44_P444339  |
| A_43_P12994   | Nup155        | A_43_P12994   |
| A_44_P1035802 | LOC291415     | A_44_P1035802 |
| A_44_P161296  | LOC313013     | A_44_P161296  |
| A_44_P480533  | LOC310845     | A_44_P480533  |
| A_44_P100636  | LOC295452     | A_44_P100636  |
| A_44_P415177  | LOC300942     | A_44_P415177  |
| A_43_P14214   | Psm6          | A_43_P14214   |
| A_44_P278881  | LOC290019     | A_44_P278881  |
| A_44_P455073  | LOC367010     | A_44_P455073  |
| A_44_P605101  | BF557668      | A_44_P605101  |
| A_44_P607583  | MGC94251      | A_44_P607583  |
| A_44_P482928  | LOC306960     | A_44_P482928  |
| A_44_P836253  | AW141337      | A_44_P836253  |
| A_44_P183979  | AW141315      | A_44_P183979  |
| A_44_P441296  | LOC288024     | A_44_P441296  |
| A_44_P421157  | AW531363      | A_44_P421157  |
| A_44_P806369  | ENSRNOT000000 | A_44_P806369  |
| A_44_P142454  | LOC310098     | A_44_P142454  |
| A_43_P22590   | BE099797      | A_43_P22590   |
| A_44_P443412  | LOC298787     | A_44_P443412  |
| A_44_P386888  | LOC290230     | A_44_P386888  |
| A_44_P103913  | Cnn3          | A_44_P103913  |
| A_44_P304024  | Gmfg          | A_44_P304024  |
| A_44_P1026398 | Loc192269     | A_44_P1026398 |
| A_44_P346426  | Wdr12         | A_44_P346426  |
| A_44_P994686  | Tnnt2         | A_44_P994686  |
| A_44_P328872  | LOC303908     | A_44_P328872  |
| A_44_P655718  | TC514229      | A_44_P655718  |
| A_44_P103918  | Cnn3          | A_44_P103918  |
| A_42_P574153  | 222382_Rn     | A_42_P574153  |
| A_43_P21814   | CB547106      | A_43_P21814   |
| A_44_P973249  | AW141214      | A_44_P973249  |
| A_44_P142724  | LOC316273     | A_44_P142724  |
| A_44_P409860  | ENSRNOT000000 | A_44_P409860  |
| A_44_P367624  | LOC317588     | A_44_P367624  |
| A_44_P898694  | ENSRNOT000000 | A_44_P898694  |
| A_42_P651962  | Hsp60         | A_42_P651962  |
| A_44_P1012711 | LOC294712     | A_44_P1012711 |
| A_42_P741027  | Jun           | A_42_P741027  |
| A_43_P12448   | omb5          | A_43_P12448   |
| A_44_P154513  | LOC362420     | A_44_P154513  |
| A_42_P755087  | MGC94083      | A_42_P755087  |
| A_44_P835769  | AW919125      | A_44_P835769  |
| A_44_P667382  | ENSRNOT000000 | A_44_P667382  |
| A_44_P419878  | LOC367170     | A_44_P419878  |
| A_44_P489782  | LOC294086     | A_44_P489782  |

|               |               |               |
|---------------|---------------|---------------|
| A_44_P177950  | LOC305391     | A_44_P177950  |
| A_44_P429755  | Lin7c         | A_44_P429755  |
| A_43_P10939   | AI230347      | A_43_P10939   |
| A_42_P743301  | Psma1         | A_42_P743301  |
| A_44_P405843  | LOC303517     | A_44_P405843  |
| A_44_P384698  | LOC297785     | A_44_P384698  |
| A_44_P699821  | TC481372      | A_44_P699821  |
| A_44_P466474  | LOC291205     | A_44_P466474  |
| A_44_P1026688 | LOC366595     | A_44_P1026688 |
| A_44_P299671  | LOC360834     | A_44_P299671  |
| A_43_P11636   | Hspe1         | A_43_P11636   |
| A_44_P886690  | TC512094      | A_44_P886690  |
| A_44_P912711  | BG667330      | A_44_P912711  |
| A_44_P535742  | Hsp60         | A_44_P535742  |
| A_44_P393966  | LOC362324     | A_44_P393966  |
| A_44_P463749  | Rasd1         | A_44_P463749  |
| A_44_P776032  | ENSRNOT000000 | A_44_P776032  |
| A_44_P559106  | LOC288305     | A_44_P559106  |
| A_44_P105441  | LOC313443     | A_44_P105441  |
| A_44_P391426  | LOC292849     | A_44_P391426  |
| A_44_P382372  | LOC302730     | A_44_P382372  |
| A_42_P528844  | FacI5         | A_42_P528844  |
| A_44_P149248  | LOC312938     | A_44_P149248  |
| A_44_P342124  | Ube2d2        | A_44_P342124  |
| A_44_P1007729 | Ocln          | A_44_P1007729 |
| A_44_P762216  | TC488813      | A_44_P762216  |
| A_44_P447814  | LOC364184     | A_44_P447814  |
| A_44_P134676  | LOC362537     | A_44_P134676  |
| A_44_P166955  | BF523428      | A_44_P166955  |
| A_44_P255254  | Ywhab         | A_44_P255254  |
| A_44_P698981  | LOC301796     | A_44_P698981  |
| A_44_P461944  | Morf4I2       | A_44_P461944  |
| A_44_P356492  | LOC362154     | A_44_P356492  |
| A_43_P10034   | BF550228      | A_43_P10034   |
| A_44_P196532  | Mk1           | A_44_P196532  |
| A_42_P629062  | 298528_Rn     | A_42_P629062  |
| A_44_P281297  | LOC364503     | A_44_P281297  |
| A_42_P468216  | 220048_Rn     | A_42_P468216  |
| A_42_P665106  | 217228_Rn     | A_42_P665106  |
| A_42_P653673  | 199525_Rn     | A_42_P653673  |
| A_44_P538789  | LOC289157     | A_44_P538789  |
| A_44_P903850  | AY724476      | A_44_P903850  |
| A_44_P437941  | Mrpl17        | A_44_P437941  |
| A_44_P1037817 | Lman2         | A_44_P1037817 |
| A_44_P158361  | LOC305178     | A_44_P158361  |
| A_42_P504358  | 218855_Rn     | A_42_P504358  |
| A_42_P609658  | Psmc2         | A_42_P609658  |
| A_42_P814081  | LOC362575     | A_42_P814081  |
| A_42_P652357  | Ctnnb         | A_42_P652357  |
| A_44_P792230  | TC483789      | A_44_P792230  |
| A_43_P12649   | Rnp24-pending | A_43_P12649   |

|               |               |               |
|---------------|---------------|---------------|
| A_44_P187166  | LOC291081     | A_44_P187166  |
| A_44_P355620  | BF549650      | A_44_P355620  |
| A_44_P374817  | Atic          | A_44_P374817  |
| A_43_P20941   | CB546259      | A_43_P20941   |
| A_44_P699091  | BC088296      | A_44_P699091  |
| A_44_P342239  | LOC308400     | A_44_P342239  |
| A_43_P11377   | BG381714      | A_43_P11377   |
| A_42_P641107  | 221190_Rn     | A_42_P641107  |
| A_44_P131209  | LOC300904     | A_44_P131209  |
| A_44_P867355  | ENSRNOT000000 | A_44_P867355  |
| A_44_P606833  | TC475806      | A_44_P606833  |
| A_44_P1035190 | LOC296137     | A_44_P1035190 |
| A_44_P491924  | Nedd8         | A_44_P491924  |
| A_44_P395512  | Slc25a3       | A_44_P395512  |
| A_44_P284810  | Inpp5e        | A_44_P284810  |
| A_44_P913600  | ENSRNOT000000 | A_44_P913600  |
| A_44_P591001  | ENSRNOT000000 | A_44_P591001  |
| A_44_P470961  | LOC309918     | A_44_P470961  |
| A_44_P539680  | LOC56785      | A_44_P539680  |
| A_44_P898543  | ENSRNOT000000 | A_44_P898543  |
| A_44_P561155  | BF287558      | A_44_P561155  |
| A_44_P468756  | LOC364914     | A_44_P468756  |
| A_42_P655425  | LOC294711     | A_42_P655425  |
| A_43_P12961   | Eif4ebp1      | A_43_P12961   |
| A_44_P342756  | LOC367226     | A_44_P342756  |
| A_43_P10814   | BI284261      | A_43_P10814   |
| A_42_P665460  | 298083_Rn     | A_42_P665460  |
| A_44_P429006  | LOC306351     | A_44_P429006  |
| A_42_P746089  | 205140_Rn     | A_42_P746089  |
| A_44_P372718  | LOC293778     | A_44_P372718  |
| A_44_P130516  | RT1-Db1       | A_44_P130516  |
| A_44_P332694  | LOC303179     | A_44_P332694  |
| A_44_P283784  | LOC310512     | A_44_P283784  |
| A_44_P455108  | LOC367110     | A_44_P455108  |
| A_44_P382512  | LOC300838     | A_44_P382512  |
| A_44_P449638  | Psm2          | A_44_P449638  |
| A_44_P1058980 | LOC305258     | A_44_P1058980 |
| A_44_P166406  | LOC298586     | A_44_P166406  |
| A_44_P606441  | TC462103      | A_44_P606441  |
| A_43_P13244   | NM_134346     | A_43_P13244   |
| A_44_P174261  | AI227823      | A_44_P174261  |
| A_44_P293283  | LOC299213     | A_44_P293283  |
| A_44_P1036430 | Usp14         | A_44_P1036430 |
| A_44_P173370  | LOC294447     | A_44_P173370  |
| A_44_P491604  | Txndc9        | A_44_P491604  |
| A_44_P254238  | Bcl2l         | A_44_P254238  |
| A_44_P494112  | Grb2          | A_44_P494112  |
| A_44_P981679  | AW143485      | A_44_P981679  |
| A_44_P161525  | LOC291737     | A_44_P161525  |
| A_44_P351563  | LOC361491     | A_44_P351563  |
| A_44_P203646  | LOC289349     | A_44_P203646  |

|               |               |               |
|---------------|---------------|---------------|
| A_44_P638915  | TC492564      | A_44_P638915  |
| A_44_P536613  | LOC309527     | A_44_P536613  |
| A_44_P114892  | LOC287625     | A_44_P114892  |
| A_44_P494396  | LOC289614     | A_44_P494396  |
| A_44_P523052  | LOC294324     | A_44_P523052  |
| A_44_P316916  | LOC288039     | A_44_P316916  |
| A_44_P147356  | LOC291545     | A_44_P147356  |
| A_44_P392334  | Ppp4r1        | A_44_P392334  |
| A_42_P801580  | 218557_Rn     | A_42_P801580  |
| A_44_P821943  | ENSRNOT000000 | A_44_P821943  |
| A_43_P12409   | Anxa4         | A_43_P12409   |
| A_42_P771158  | 203263_Rn     | A_42_P771158  |
| A_44_P532249  | LOC361810     | A_44_P532249  |
| A_44_P1037609 | Mat2a         | A_44_P1037609 |
| A_44_P432937  | AW914950      | A_44_P432937  |
| A_44_P930234  | TC482405      | A_44_P930234  |
| A_44_P341151  | AI548388      | A_44_P341151  |
| A_42_P685418  | 222405_Rn     | A_42_P685418  |
| A_44_P130894  | LOC295497     | A_44_P130894  |
| A_44_P238392  | LOC309176     | A_44_P238392  |
| A_44_P837006  | ENSRNOT000000 | A_44_P837006  |
| A_44_P183694  | AB072614      | A_44_P183694  |
| A_44_P423803  | Actx          | A_44_P423803  |
| A_43_P11789   | Ppp2cb        | A_43_P11789   |
| A_44_P195839  | AW915339      | A_44_P195839  |
| A_44_P555021  | Cdc42         | A_44_P555021  |
| A_44_P464393  | LOC314799     | A_44_P464393  |
| A_43_P12780   | Agps          | A_43_P12780   |
| A_44_P1060345 | LOC304024     | A_44_P1060345 |
| A_44_P339994  | LOC364223     | A_44_P339994  |
| A_44_P187167  | LOC291081     | A_44_P187167  |
| A_43_P20970   | CB546288      | A_43_P20970   |
| A_44_P168867  | LOC315047     | A_44_P168867  |
| A_44_P222256  | MGC93965      | A_44_P222256  |
| A_44_P531245  | Anxa1         | A_44_P531245  |
| A_42_P729705  | 295301_Rn     | A_42_P729705  |
| A_44_P280965  | Mcl1          | A_44_P280965  |
| A_44_P426558  | Hsp60         | A_44_P426558  |
| A_44_P414775  | LOC364183     | A_44_P414775  |
| A_44_P464042  | LOC306103     | A_44_P464042  |
| A_44_P442931  | LOC299058     | A_44_P442931  |
| A_44_P541230  | LOC305714     | A_44_P541230  |
| A_43_P19089   | CB548241      | A_43_P19089   |
| A_44_P478114  | LOC305984     | A_44_P478114  |
| A_43_P15198   | BQ204111      | A_43_P15198   |
| A_44_P542910  | Golga7        | A_44_P542910  |
| A_42_P627394  | 378598_Rn     | A_42_P627394  |
| A_44_P201583  | LOC362293     | A_44_P201583  |
| A_44_P156433  | Vcp           | A_44_P156433  |
| A_44_P1022421 | Hnrpd         | A_44_P1022421 |
| A_44_P485409  | LOC367873     | A_44_P485409  |

|               |               |               |
|---------------|---------------|---------------|
| A_44_P397526  | Psmc1         | A_44_P397526  |
| A_44_P237994  | Abcg1         | A_44_P237994  |
| A_43_P15540   | TAP           | A_43_P15540   |
| A_44_P667768  | ENSRNOT000000 | A_44_P667768  |
| A_44_P986952  | AW916350      | A_44_P986952  |
| A_44_P349702  | LOC299262     | A_44_P349702  |
| A_43_P12712   | Impa1         | A_43_P12712   |
| A_44_P314187  | LOC365554     | A_44_P314187  |
| A_44_P351898  | LOC297176     | A_44_P351898  |
| A_44_P681642  | BI395556      | A_44_P681642  |
| A_43_P19174   | CB545171      | A_43_P19174   |
| A_44_P331119  | LOC302981     | A_44_P331119  |
| A_44_P309584  | LOC362748     | A_44_P309584  |
| A_44_P488489  | AW918107      | A_44_P488489  |
| A_44_P1007215 | LOC289801     | A_44_P1007215 |
| A_44_P652577  | TC462533      | A_44_P652577  |
| A_43_P11800   | Bax           | A_43_P11800   |
| A_44_P236512  | LOC295643     | A_44_P236512  |
| A_44_P713910  | LOC366253     | A_44_P713910  |
| A_44_P525392  | LOC362335     | A_44_P525392  |
| A_43_P13089   | NM_080887     | A_43_P13089   |
| A_42_P780715  | Letm1         | A_42_P780715  |
| A_44_P976406  | TC488927      | A_44_P976406  |
| A_44_P790928  | ENSRNOT000000 | A_44_P790928  |
| A_44_P962711  | TC510125      | A_44_P962711  |
| A_44_P930585  | TC486532      | A_44_P930585  |
| A_44_P426608  | LOC305827     | A_44_P426608  |
| A_44_P998555  | Hcfc2         | A_44_P998555  |
| A_44_P641262  | BC079131      | A_44_P641262  |
| A_44_P250041  | Psemb7        | A_44_P250041  |
| A_42_P736315  | 384905_Rn     | A_42_P736315  |
| A_42_P626104  | 218818_Rn     | A_42_P626104  |
| A_42_P805300  | 222095_Rn     | A_42_P805300  |
| A_44_P1030594 | Cebpg         | A_44_P1030594 |
| A_44_P337253  | AY325226      | A_44_P337253  |
| A_44_P358818  | LOC311067     | A_44_P358818  |
| A_44_P413102  | AA957447      | A_44_P413102  |
| A_43_P15715   | D37934.1      | A_43_P15715   |
| A_43_P18947   | CB606342      | A_43_P18947   |
| A_44_P560195  | ENSRNOT000000 | A_44_P560195  |
| A_44_P915530  | TC488409      | A_44_P915530  |
| A_44_P320130  | BI395659      | A_44_P320130  |
| A_44_P374618  | Cdkn1c        | A_44_P374618  |
| A_43_P12406   | Arf4          | A_43_P12406   |
| A_44_P160868  | GrpE#1        | A_44_P160868  |
| A_44_P468694  | LOC290902     | A_44_P468694  |
| A_44_P1010553 | LOC290775     | A_44_P1010553 |
| A_44_P448307  | LOC301511     | A_44_P448307  |
| A_44_P191467  | Atp6k         | A_44_P191467  |
| A_44_P477620  | Pla2g4a       | A_44_P477620  |
| A_44_P638995  | TC493369      | A_44_P638995  |

|               |               |               |
|---------------|---------------|---------------|
| A_44_P478917  | LOC291794     | A_44_P478917  |
| A_44_P276352  | Id3           | A_44_P276352  |
| A_44_P110063  | LOC364778     | A_44_P110063  |
| A_44_P1056489 | St13          | A_44_P1056489 |
| A_44_P868944  | TC481383      | A_44_P868944  |
| A_42_P772356  | 222476_Rn     | A_42_P772356  |
| A_44_P123315  | Gpx1          | A_44_P123315  |
| A_44_P791604  | TC473776      | A_44_P791604  |
| A_44_P496788  | Fip1l1        | A_44_P496788  |
| A_44_P518226  | LOC291523     | A_44_P518226  |
| A_44_P612277  | BF396985      | A_44_P612277  |
| A_44_P549501  | AW915249      | A_44_P549501  |
| A_44_P417055  | LOC305375     | A_44_P417055  |
| A_44_P1016480 | Lpl           | A_44_P1016480 |
| A_43_P12896   | Yme1l1        | A_43_P12896   |
| A_44_P517682  | TOM70         | A_44_P517682  |
| A_44_P760732  | ENSRNOT000000 | A_44_P760732  |
| A_43_P14872   | Sdc1          | A_43_P14872   |
| A_44_P1022711 | LOC295971     | A_44_P1022711 |
| A_44_P282716  | Nit1          | A_44_P282716  |
| A_44_P175391  | Tmp21         | A_44_P175391  |
| A_44_P130559  | Psemb1        | A_44_P130559  |
| A_44_P280759  | Npm1          | A_44_P280759  |
| A_42_P604121  | CB547330      | A_42_P604121  |
| A_43_P13342   | NM_138974     | A_43_P13342   |
| A_44_P399146  | Nras          | A_44_P399146  |
| A_44_P161052  | Acaa          | A_44_P161052  |
| A_44_P100618  | LOC310613     | A_44_P100618  |
| A_44_P543753  | LOC362222     | A_44_P543753  |
| A_44_P511254  | LOC302809     | A_44_P511254  |
| A_44_P384438  | LOC361872     | A_44_P384438  |
| A_44_P203731  | LOC310988     | A_44_P203731  |
| A_44_P529627  | LOC314432     | A_44_P529627  |
| A_44_P269078  | Tcp1          | A_44_P269078  |
| A_44_P421405  | Sh3kbp1       | A_44_P421405  |
| A_44_P214040  | B2m           | A_44_P214040  |
| A_43_P20702   | CB544301      | A_43_P20702   |
| A_44_P102774  | LOC361640     | A_44_P102774  |
| A_44_P475363  | LOC63994      | A_44_P475363  |
| A_44_P360761  | Actr3         | A_44_P360761  |
| A_44_P1025208 | LOC292244     | A_44_P1025208 |
| A_44_P208275  | Ugcg          | A_44_P208275  |
| A_44_P236876  | LOC367344     | A_44_P236876  |
| A_44_P888273  | TC506223      | A_44_P888273  |
| A_44_P109650  | Hnrpab        | A_44_P109650  |
| A_44_P547056  | LOC361208     | A_44_P547056  |
| A_44_P620665  | CF110749      | A_44_P620665  |
| A_43_P17626   | CB547985      | A_43_P17626   |
| A_44_P286623  | AA819657      | A_44_P286623  |
| A_44_P432965  | Fdps          | A_44_P432965  |
| A_44_P885959  | TC498155      | A_44_P885959  |

|               |               |               |
|---------------|---------------|---------------|
| A_44_P456933  | LOC292950     | A_44_P456933  |
| A_44_P477555  | Ns5atp9       | A_44_P477555  |
| A_44_P879120  | AW914513      | A_44_P879120  |
| A_44_P867760  | LOC314605     | A_44_P867760  |
| A_42_P529550  | Gng8          | A_42_P529550  |
| A_44_P760832  | TC462670      | A_44_P760832  |
| A_43_P17266   | BF566146      | A_43_P17266   |
| A_44_P1045354 | LOC287642     | A_44_P1045354 |
| A_44_P771409  | BG667707      | A_44_P771409  |
| A_43_P16672   | CB605662      | A_43_P16672   |
| A_44_P1033758 | LOC361305     | A_44_P1033758 |
| A_43_P12011   | Cltc          | A_43_P12011   |
| A_43_P14446   | AI237189      | A_43_P14446   |
| A_44_P1020631 | LOC288369     | A_44_P1020631 |
| A_44_P208324  | Rab1          | A_44_P208324  |
| A_43_P13337   | NM_138911     | A_43_P13337   |
| A_44_P1009491 | AI030501      | A_44_P1009491 |
| A_44_P747708  | TC502149      | A_44_P747708  |
| A_44_P276435  | Nat1          | A_44_P276435  |
| A_44_P792481  | TC486673      | A_44_P792481  |
| A_43_P13188   | NM_133423     | A_43_P13188   |
| A_44_P898658  | ENSRNOT000000 | A_44_P898658  |
| A_43_P14574   | Vamp3         | A_43_P14574   |
| A_42_P794901  | Ywhah         | A_42_P794901  |
| A_42_P506402  | 222985_Rn     | A_42_P506402  |
| A_44_P944361  | ENSRNOT000000 | A_44_P944361  |
| A_44_P250892  | LOC313056     | A_44_P250892  |
| A_42_P599210  | 220370_Rn     | A_42_P599210  |
| A_42_P738277  | Kcnk6         | A_42_P738277  |
| A_44_P203493  | Tceb1         | A_44_P203493  |
| A_44_P391986  | LOC360631     | A_44_P391986  |
| A_42_P823351  | 291751_Rn     | A_42_P823351  |
| A_44_P525827  | Cct3          | A_44_P525827  |
| A_44_P522477  | MGC94135      | A_44_P522477  |
| A_44_P263060  | LOC287125     | A_44_P263060  |
| A_44_P251804  | Ppp2cb        | A_44_P251804  |
| A_44_P332472  | LOC171057     | A_44_P332472  |
| A_43_P17230   | BQ194339      | A_43_P17230   |
| A_43_P22685   | BE119004      | A_43_P22685   |
| A_44_P822789  | TC480145      | A_44_P822789  |
| A_42_P503768  | 208474_Rn     | A_42_P503768  |
| A_44_P788644  | AI030814      | A_44_P788644  |
| A_44_P537103  | LOC287723     | A_44_P537103  |
| A_44_P330035  | BM986596      | A_44_P330035  |
| A_44_P1034209 | LOC360901     | A_44_P1034209 |
| A_44_P539231  | LOC299227     | A_44_P539231  |
| A_44_P1006279 | LOC290408     | A_44_P1006279 |
| A_44_P524472  | LOC294718     | A_44_P524472  |
| A_42_P641168  | RPT           | A_42_P641168  |
| A_44_P1003210 | AF452728      | A_44_P1003210 |
| A_44_P538165  | AY485933      | A_44_P538165  |



|               |               |               |
|---------------|---------------|---------------|
| A_44_P358110  | Tsg101        | A_44_P358110  |
| A_42_P796827  | 229256_Rn     | A_42_P796827  |
| A_43_P10039   | BF397678      | A_43_P10039   |
| A_44_P134685  | LOC286890     | A_44_P134685  |
| A_44_P210410  | LOC291081     | A_44_P210410  |
| A_44_P875024  | BQ208403      | A_44_P875024  |
| A_44_P357338  | Ptp4a1        | A_44_P357338  |
| A_44_P928669  | ENSRNOT000000 | A_44_P928669  |
| A_43_P19378   | CB545262      | A_43_P19378   |
| A_44_P143567  | Fdps          | A_44_P143567  |
| A_44_P645135  | BF565370      | A_44_P645135  |
| A_43_P14682   | H2afz         | A_43_P14682   |
| A_42_P668972  | 347624_Rn     | A_42_P668972  |
| A_44_P426672  | LOC295334     | A_44_P426672  |
| A_44_P180080  | MPL3          | A_44_P180080  |
| A_44_P1050889 | LOC293173     | A_44_P1050889 |
| A_42_P507566  | LOC299340     | A_42_P507566  |
| A_44_P156922  | MGC94574      | A_44_P156922  |
| A_44_P490235  | LOC367260     | A_44_P490235  |
| A_43_P14175   | Cycc          | A_43_P14175   |
| A_44_P152434  | LOC363564     | A_44_P152434  |
| A_44_P401074  | LOC362902     | A_44_P401074  |
| A_44_P365653  | LOC361596     | A_44_P365653  |
| A_42_P472375  | Pdk2          | A_42_P472375  |
| A_44_P837196  | ENSRNOT000000 | A_44_P837196  |
| A_44_P555664  | LOC302708     | A_44_P555664  |
| A_44_P745881  | TC481788      | A_44_P745881  |
| A_44_P348778  | AW917950      | A_44_P348778  |
| A_42_P808456  | LOC289338     | A_42_P808456  |
| A_44_P424164  | LOC302479     | A_44_P424164  |
| A_44_P808277  | TC490054      | A_44_P808277  |
| A_44_P988400  | BF289858      | A_44_P988400  |
| A_42_P478706  | LOC295216     | A_42_P478706  |
| A_42_P496411  | 326542_Rn     | A_42_P496411  |
| A_42_P532458  | 222694_Rn     | A_42_P532458  |
| A_44_P206061  | LOC361748     | A_44_P206061  |
| A_44_P852338  | ENSRNOT000000 | A_44_P852338  |
| A_44_P411162  | BF287028      | A_44_P411162  |
| A_44_P289968  | Taldo1        | A_44_P289968  |
| A_44_P231227  | Mg87          | A_44_P231227  |
| A_43_P16871   | CA333817      | A_43_P16871   |
| A_44_P282605  | AI013088      | A_44_P282605  |
| A_44_P1022699 | LOC290028     | A_44_P1022699 |
| A_42_P462015  | 204050_Rn     | A_42_P462015  |
| A_44_P125575  | AA859178      | A_44_P125575  |
| A_44_P938073  | BF419552      | A_44_P938073  |
| A_44_P1024065 | Hdac5         | A_44_P1024065 |
| A_44_P621592  | ENSRNOT000000 | A_44_P621592  |
| A_44_P886240  | TC501443      | A_44_P886240  |
| A_44_P269782  | LOC291387     | A_44_P269782  |
| A_44_P931036  | TC491349      | A_44_P931036  |

|               |               |               |
|---------------|---------------|---------------|
| A_44_P881540  | AW142697      | A_44_P881540  |
| A_43_P10136   | AI556126      | A_43_P10136   |
| A_44_P163242  | Tacstd1       | A_44_P163242  |
| A_44_P102661  | Wmp1          | A_44_P102661  |
| A_42_P625157  | BF560938      | A_42_P625157  |
| A_44_P238939  | LOC366145     | A_44_P238939  |
| A_44_P1034068 | AW916902      | A_44_P1034068 |
| A_44_P481892  | AW917394      | A_44_P481892  |
| A_42_P830713  | 298606_Rn     | A_42_P830713  |
| A_42_P527101  | 219819_Rn     | A_42_P527101  |
| A_44_P833772  | AW918562      | A_44_P833772  |
| A_44_P135829  | LOC313620     | A_44_P135829  |
| A_42_P733814  | 325033_Rn     | A_42_P733814  |
| A_42_P751562  | 222852_Rn     | A_42_P751562  |
| A_43_P15023   | AW918028      | A_43_P15023   |
| A_44_P809962  | TC515814      | A_44_P809962  |
| A_44_P874636  | BF565803      | A_44_P874636  |
| A_44_P361327  | LOC367527     | A_44_P361327  |
| A_44_P554377  | LOC289874     | A_44_P554377  |
| A_44_P928761  | ENSRNOT000000 | A_44_P928761  |
| A_44_P1023264 | G6pt1         | A_44_P1023264 |
| A_44_P264299  | Ckb           | A_44_P264299  |
| A_44_P822769  | TC479913      | A_44_P822769  |
| A_44_P135678  | LOC311575     | A_44_P135678  |
| A_43_P15242   | Nr3c1         | A_43_P15242   |
| A_44_P817849  | AW143988      | A_44_P817849  |
| A_44_P492533  | LOC363108     | A_44_P492533  |
| A_44_P161535  | LOC364882     | A_44_P161535  |
| A_44_P1015425 | LOC297725     | A_44_P1015425 |
| A_44_P402584  | Gtf2i         | A_44_P402584  |
| A_44_P266154  | AA848813      | A_44_P266154  |
| A_44_P428068  | LOC363032     | A_44_P428068  |
| A_44_P401161  | LOC303471     | A_44_P401161  |
| A_43_P14852   | AI555341      | A_43_P14852   |
| A_44_P839357  | TC494274      | A_44_P839357  |
| A_44_P401165  | Lap18         | A_44_P401165  |
| A_44_P264837  | LOC363931     | A_44_P264837  |
| A_44_P528510  | AI177507      | A_44_P528510  |
| A_42_P729482  | 293907_Rn     | A_42_P729482  |
| A_44_P590671  | ENSRNOT000000 | A_44_P590671  |
| A_44_P901229  | TC499847      | A_44_P901229  |
| A_42_P499282  | 296523_Rn     | A_42_P499282  |
| A_44_P920467  | Anxa2         | A_44_P920467  |
| A_44_P259521  | Ndufa5        | A_44_P259521  |
| A_44_P993660  | BG666613      | A_44_P993660  |
| A_44_P283561  | Mgst1         | A_44_P283561  |
| A_44_P177162  | LOC312248     | A_44_P177162  |
| A_44_P359957  | Spnr          | A_44_P359957  |
| A_44_P850979  | BF549558      | A_44_P850979  |
| A_44_P209995  | AI228214      | A_44_P209995  |
| A_44_P349769  | LOC295574     | A_44_P349769  |

|               |               |               |
|---------------|---------------|---------------|
| A_44_P274624  | LOC367530     | A_44_P274624  |
| A_44_P683778  | TC473458      | A_44_P683778  |
| A_44_P303933  | BG153272      | A_44_P303933  |
| A_44_P421897  | LOC294985     | A_44_P421897  |
| A_44_P446882  | Abcb6         | A_44_P446882  |
| A_43_P12153   | Htr3b         | A_43_P12153   |
| A_44_P652658  | TC466877      | A_44_P652658  |
| A_42_P544167  | Tep1          | A_42_P544167  |
| A_44_P592086  | TC483332      | A_44_P592086  |
| A_44_P195267  | BF391710      | A_44_P195267  |
| A_43_P15057   | BF284190      | A_43_P15057   |
| A_44_P551963  | Y17323        | A_44_P551963  |
| A_43_P13066   | NM_078623     | A_43_P13066   |
| A_44_P561113  | TC476741      | A_44_P561113  |
| A_44_P506024  | ENSRNOT000000 | A_44_P506024  |
| A_44_P445938  | LOC360526     | A_44_P445938  |
| A_43_P18764   | CB544880      | A_43_P18764   |
| A_44_P372979  | LOC297595     | A_44_P372979  |
| A_44_P340121  | LOC295654     | A_44_P340121  |
| A_42_P686567  | 385199_Rn     | A_42_P686567  |
| A_44_P324482  | BF542516      | A_44_P324482  |
| A_44_P1039165 | LOC363210     | A_44_P1039165 |
| A_42_P787181  | 298541_Rn     | A_42_P787181  |
| A_44_P851620  | AW914766      | A_44_P851620  |
| A_44_P1003794 | TC473615      | A_44_P1003794 |
| A_44_P1056401 | MGC94853      | A_44_P1056401 |
| A_44_P1031483 | TC465936      | A_44_P1031483 |
| A_43_P12511   | Rhok          | A_43_P12511   |
| A_44_P234460  | LOC299105     | A_44_P234460  |
| A_42_P585328  | Xrcc1         | A_42_P585328  |
| A_43_P12233   | LOC64305      | A_43_P12233   |
| A_44_P1011038 | BF566642      | A_44_P1011038 |
| A_44_P158420  | Impdh2        | A_44_P158420  |
| A_44_P975731  | TC480339      | A_44_P975731  |
| A_44_P228351  | Cd47          | A_44_P228351  |
| A_44_P807557  | TC481710      | A_44_P807557  |
| A_44_P557994  | LOC298125     | A_44_P557994  |
| A_44_P1050755 | Abp10         | A_44_P1050755 |
| A_44_P225239  | LOC367126     | A_44_P225239  |
| A_44_P685508  | TC495475      | A_44_P685508  |
| A_44_P1040187 | LOC288912     | A_44_P1040187 |
| A_42_P664259  | Abca2         | A_42_P664259  |
| A_42_P696561  | 220508_Rn     | A_42_P696561  |
| A_42_P620006  | 203867_Rn     | A_42_P620006  |
| A_44_P917186  | TC511974      | A_44_P917186  |
| A_44_P241885  | Ech1          | A_44_P241885  |
| A_44_P188901  | AI170643      | A_44_P188901  |
| A_43_P10019   | BE109962      | A_43_P10019   |
| A_44_P1060495 | LOC313253     | A_44_P1060495 |
| A_44_P428970  | LOC290204     | A_44_P428970  |
| A_44_P1004617 | Tusc4         | A_44_P1004617 |

|               |               |               |
|---------------|---------------|---------------|
| A_44_P637827  | TC479584      | A_44_P637827  |
| A_44_P146465  | Arbp          | A_44_P146465  |
| A_44_P121839  | LOC366596     | A_44_P121839  |
| A_42_P771848  | 199418_Rn     | A_42_P771848  |
| A_44_P537410  | Cyrl          | A_44_P537410  |
| A_44_P470627  | Ces1          | A_44_P470627  |
| A_44_P884188  | TC476272      | A_44_P884188  |
| A_44_P529299  | Rtkn          | A_44_P529299  |
| A_44_P991335  | TC493410      | A_44_P991335  |
| A_44_P557037  | AA799899      | A_44_P557037  |
| A_44_P715234  | TC483535      | A_44_P715234  |
| A_44_P324845  | BF551067      | A_44_P324845  |
| A_42_P648006  | 295416_Rn     | A_42_P648006  |
| A_44_P1036534 | TC473206      | A_44_P1036534 |
| A_42_P579376  | Nbl1          | A_42_P579376  |
| A_44_P182136  | AI556689      | A_44_P182136  |
| A_44_P721714  | Rpl32         | A_44_P721714  |
| A_42_P648800  | 296023_Rn     | A_42_P648800  |
| A_42_P769969  | 286863_Rn     | A_42_P769969  |
| A_44_P260181  | Prss23        | A_44_P260181  |
| A_44_P114606  | LOC294344     | A_44_P114606  |
| A_44_P1009948 | LOC303180     | A_44_P1009948 |
| A_43_P15081   | BF523076      | A_43_P15081   |
| A_44_P680341  | AI555659      | A_44_P680341  |
| A_42_P518462  | Hmgn3         | A_42_P518462  |
| A_44_P444343  | AW142434      | A_44_P444343  |
| A_44_P853184  | TC476390      | A_44_P853184  |
| A_43_P13924   | AA818807      | A_43_P13924   |
| A_44_P548303  | MGC105734     | A_44_P548303  |
| A_44_P284954  | AA944253      | A_44_P284954  |
| A_44_P390746  | AW143482      | A_44_P390746  |
| A_42_P671285  | 293031_Rn     | A_42_P671285  |
| A_42_P466272  | Psen2         | A_42_P466272  |
| A_44_P426541  | LOC305156     | A_44_P426541  |
| A_43_P16642   | BG663001      | A_43_P16642   |
| A_44_P127740  | BC083712      | A_44_P127740  |
| A_43_P14796   | AW535419      | A_43_P14796   |
| A_44_P182008  | Gstt2         | A_44_P182008  |
| A_44_P117955  | LOC362128     | A_44_P117955  |
| A_44_P261779  | AI137045      | A_44_P261779  |
| A_44_P304579  | LOC290226     | A_44_P304579  |
| A_42_P665509  | Mapk8ip1      | A_42_P665509  |
| A_42_P555125  | Atp1b3        | A_42_P555125  |
| A_42_P781116  | LOC315741     | A_42_P781116  |
| A_42_P646213  | 295114_Rn     | A_42_P646213  |
| A_42_P597638  | Mte1          | A_42_P597638  |
| A_44_P929119  | ENSRNOT000000 | A_44_P929119  |
| A_42_P550241  | Fat2          | A_42_P550241  |
| A_42_P526030  | Decr1         | A_42_P526030  |
| A_44_P142029  | SCIRP10       | A_44_P142029  |
| A_44_P636337  | ENSRNOT000000 | A_44_P636337  |

|               |           |               |
|---------------|-----------|---------------|
| A_43_P23403   | BM387470  | A_43_P23403   |
| A_44_P425848  | AW915270  | A_44_P425848  |
| A_43_P14611   | AI105272  | A_43_P14611   |
| A_44_P175447  | LOC292672 | A_44_P175447  |
| A_44_P807394  | TC479339  | A_44_P807394  |
| A_43_P15669   | M22631.1  | A_43_P15669   |
| A_43_P12206   | Xylt2     | A_43_P12206   |
| A_44_P369808  | GST13-13  | A_44_P369808  |
| A_44_P396370  | LOC362626 | A_44_P396370  |
| A_44_P369617  | Ddah1     | A_44_P369617  |
| A_44_P371125  | LOC64305  | A_44_P371125  |
| A_44_P741723  | AW916521  | A_44_P741723  |
| A_44_P1042596 | Hmgn2     | A_44_P1042596 |
| A_44_P411743  | Gpx2      | A_44_P411743  |
| A_42_P635377  | 289161_Rn | A_42_P635377  |
| A_42_P834147  | 221682_Rn | A_42_P834147  |
| A_44_P839332  | TC493889  | A_44_P839332  |
| A_44_P406636  | AI029975  | A_44_P406636  |
| A_44_P555428  | LOC361884 | A_44_P555428  |
| A_42_P645923  | Cbs       | A_42_P645923  |
| A_44_P255728  | LOC367393 | A_44_P255728  |
| A_44_P471901  | Rod1      | A_44_P471901  |
| A_44_P1007110 | CB544944  | A_44_P1007110 |
| A_44_P447623  | Ugdh      | A_44_P447623  |
| A_43_P15268   | Rps15     | A_43_P15268   |
| A_44_P761041  | TC471792  | A_44_P761041  |
| A_42_P842842  | 298291_Rn | A_42_P842842  |
| A_44_P1045612 | Fxyd3     | A_44_P1045612 |
| A_44_P559149  | AI511408  | A_44_P559149  |
| A_44_P115932  | BF418884  | A_44_P115932  |
| A_44_P128929  | LOC303164 | A_44_P128929  |
| A_44_P359032  | LOC298575 | A_44_P359032  |
| A_42_P673119  | 219283_Rn | A_42_P673119  |
| A_44_P402641  | Ugt1a8    | A_44_P402641  |
| A_44_P952438  | BM385375  | A_44_P952438  |
| A_44_P509172  | AI176346  | A_44_P509172  |
| A_44_P1059789 | Akap9     | A_44_P1059789 |
| A_44_P473499  | LOC367786 | A_44_P473499  |
| A_44_P235241  | Gilz      | A_44_P235241  |
| A_44_P198705  | H1f0      | A_44_P198705  |
| A_43_P14867   | AW917557  | A_43_P14867   |
| A_44_P654845  | TC498733  | A_44_P654845  |
| A_42_P840729  | 217288_Rn | A_42_P840729  |
| A_43_P12888   | Pafah1b3  | A_43_P12888   |
| A_44_P480455  | LOC290212 | A_44_P480455  |
| A_44_P682186  | AW917472  | A_44_P682186  |
| A_44_P275801  | AW915764  | A_44_P275801  |
| A_42_P462711  | 201167_Rn | A_42_P462711  |
| A_44_P203993  | LOC313176 | A_44_P203993  |
| A_43_P14027   | Mipep     | A_43_P14027   |
| A_42_P566906  | 201868_Rn | A_42_P566906  |

|               |               |               |
|---------------|---------------|---------------|
| A_42_P608325  | 228257_Rn     | A_42_P608325  |
| A_44_P1002320 | BF289377      | A_44_P1002320 |
| A_44_P700424  | TC488565      | A_44_P700424  |
| A_42_P842580  | 217949_Rn     | A_42_P842580  |
| A_44_P377520  | LOC365983     | A_44_P377520  |
| A_43_P15752   | S68809.1      | A_43_P15752   |
| A_43_P10430   | AI231814      | A_43_P10430   |
| A_42_P756876  | Pdi1          | A_42_P756876  |
| A_42_P782490  | LOC307829     | A_42_P782490  |
| A_43_P22042   | CB544664      | A_43_P22042   |
| A_44_P343754  | AI578861      | A_44_P343754  |
| A_42_P792348  | 298192_Rn     | A_42_P792348  |
| A_44_P807408  | TC479482      | A_44_P807408  |
| A_44_P329712  | Hsd3b1        | A_44_P329712  |
| A_44_P222924  | LOC363240     | A_44_P222924  |
| A_44_P155816  | Eef2k         | A_44_P155816  |
| A_44_P282415  | BF290649      | A_44_P282415  |
| A_44_P976576  | TC490747      | A_44_P976576  |
| A_44_P312546  | Aldh2         | A_44_P312546  |
| A_44_P437721  | AA998800      | A_44_P437721  |
| A_42_P554044  | 220685_Rn     | A_42_P554044  |
| A_44_P501390  | LOC289704     | A_44_P501390  |
| A_44_P519187  | AI228265      | A_44_P519187  |
| A_44_P852862  | TC467254      | A_44_P852862  |
| A_44_P526866  | Klf5          | A_44_P526866  |
| A_44_P836806  | ENSRNOT000000 | A_44_P836806  |
| A_42_P829031  | Naglu         | A_42_P829031  |
| A_43_P13054   | Hadh          | A_43_P13054   |
| A_42_P552341  | 295476_Rn     | A_42_P552341  |
| A_44_P530060  | LOC367389     | A_44_P530060  |
| A_44_P236636  | LOC367796     | A_44_P236636  |
| A_44_P576215  | TC474577      | A_44_P576215  |
| A_44_P477406  | Slc2a4        | A_44_P477406  |
| A_44_P562744  | TC496040      | A_44_P562744  |
| A_44_P229568  | LOC291403     | A_44_P229568  |
| A_44_P526456  | Rpl32         | A_44_P526456  |
| A_43_P10207   | CB547605      | A_43_P10207   |
| A_44_P214650  | Rplp1         | A_44_P214650  |
| A_44_P179296  | BF287585      | A_44_P179296  |
| A_44_P131248  | LOC316373     | A_44_P131248  |
| A_42_P732189  | 293226_Rn     | A_42_P732189  |
| A_43_P16892   | AW525918      | A_43_P16892   |
| A_44_P634358  | BM986338      | A_44_P634358  |
| A_43_P12768   | Stra14        | A_43_P12768   |
| A_44_P487482  | LOC365737     | A_44_P487482  |
| A_44_P880090  | BF286205      | A_44_P880090  |
| A_42_P678870  | Cyp2f1        | A_42_P678870  |
| A_44_P416695  | Ka15          | A_44_P416695  |
| A_42_P692054  | Nfia          | A_42_P692054  |
| A_44_P1000100 | LOC295323     | A_44_P1000100 |
| A_42_P627101  | 207126_Rn     | A_42_P627101  |

|               |           |               |
|---------------|-----------|---------------|
| A_44_P1019654 | Ercc5     | A_44_P1019654 |
| A_44_P342075  | Ahnak     | A_44_P342075  |
| A_43_P12569   | ldh1      | A_43_P12569   |
| A_44_P531752  | Bcat2     | A_44_P531752  |
| A_44_P449108  | Al043579  | A_44_P449108  |
| A_42_P716352  | Gstm3     | A_42_P716352  |
| A_42_P491707  | 299018_Rn | A_42_P491707  |
| A_44_P306008  | Al179380  | A_44_P306008  |
| A_44_P343888  | BU759225  | A_44_P343888  |
| A_44_P265807  | Aldh3a2   | A_44_P265807  |
| A_44_P732517  | TC514402  | A_44_P732517  |
| A_42_P696282  | 216836_Rn | A_42_P696282  |
| A_42_P688422  | LOC316232 | A_42_P688422  |
| A_44_P348244  | AW915442  | A_44_P348244  |
| A_44_P621633  | LOC313689 | A_44_P621633  |
| A_44_P941342  | AW916026  | A_44_P941342  |
| A_44_P1007449 | LOC304500 | A_44_P1007449 |
| A_44_P629936  | TC510514  | A_44_P629936  |
| A_44_P962013  | TC497589  | A_44_P962013  |
| A_42_P626895  | 291343_Rn | A_42_P626895  |
| A_44_P588759  | BF563670  | A_44_P588759  |
| A_44_P1005199 | LOC299830 | A_44_P1005199 |
| A_44_P281393  | LOC364873 | A_44_P281393  |
| A_44_P459379  | LOC290469 | A_44_P459379  |
| A_42_P628981  | 298089_Rn | A_42_P628981  |
| A_44_P167189  | AA943125  | A_44_P167189  |
| A_44_P838967  | TC490120  | A_44_P838967  |
| A_44_P434766  | BX883047  | A_44_P434766  |
| A_44_P318188  | Bl302453  | A_44_P318188  |
| A_44_P123515  | Prpg2     | A_44_P123515  |
| A_42_P710738  | Phgdh     | A_42_P710738  |
| A_44_P915801  | TC491077  | A_44_P915801  |
| A_44_P656726  | TC501309  | A_44_P656726  |
| A_44_P107792  | LOC291900 | A_44_P107792  |
| A_44_P261599  | AA997406  | A_44_P261599  |
| A_42_P494979  | 221358_Rn | A_42_P494979  |
| A_44_P945969  | TC487038  | A_44_P945969  |
| A_44_P732819  | BQ210430  | A_44_P732819  |
| A_44_P276640  | LOC294071 | A_44_P276640  |
| A_44_P100207  | Cnp1      | A_44_P100207  |
| A_44_P364447  | BE113609  | A_44_P364447  |
| A_44_P1050054 | Pygl      | A_44_P1050054 |
| A_44_P504750  | P-cip1    | A_44_P504750  |
| A_44_P699780  | TC480823  | A_44_P699780  |
| A_43_P10689   | AW527535  | A_43_P10689   |
| A_43_P15281   | Trp63     | A_43_P15281   |
| A_44_P899002  | TC470516  | A_44_P899002  |
| A_42_P664913  | 289210_Rn | A_42_P664913  |
| A_44_P408139  | LOC360553 | A_44_P408139  |
| A_44_P513827  | LOC302978 | A_44_P513827  |
| A_43_P23237   | BF562538  | A_43_P23237   |

|               |                     |               |
|---------------|---------------------|---------------|
| A_44_P418944  | Entpd5              | A_44_P418944  |
| A_44_P107219  | LOC292624           | A_44_P107219  |
| A_44_P698919  | ENSRNOT000000       | A_44_P698919  |
| A_42_P459574  | 222332_Rn           | A_42_P459574  |
| A_44_P136857  | AW921412            | A_44_P136857  |
| A_44_P822839  | TC480871            | A_44_P822839  |
| A_44_P184110  | AI101158            | A_44_P184110  |
| A_44_P666038  | AW142608            | A_44_P666038  |
| A_44_P950330  | Rpl13               | A_44_P950330  |
| A_42_P533183  | Slc1a3              | A_42_P533183  |
| A_44_P991864  | Ece1                | A_44_P991864  |
| A_44_P1004218 | Uae1                | A_44_P1004218 |
| A_44_P480433  | LOC293997           | A_44_P480433  |
| A_44_P437896  | Bdnf                | A_44_P437896  |
| A_44_P367438  | AW917518            | A_44_P367438  |
| A_44_P538334  | Impa2               | A_44_P538334  |
| A_44_P512136  | Dhcr7               | A_44_P512136  |
| A_44_P778356  | TC498746            | A_44_P778356  |
| A_44_P398176  | lvd                 | A_44_P398176  |
| A_44_P242329  | Acaa2               | A_44_P242329  |
| A_44_P491831  | glutathione S-trans | A_44_P491831  |
| A_44_P807109  | TC474255            | A_44_P807109  |
| A_44_P233557  | RSB-11-77           | A_44_P233557  |
| A_44_P1014786 | LOC310749           | A_44_P1014786 |
| A_44_P785849  | A_44_P785849        | A_44_P785849  |
| A_42_P753215  | Synj2               | A_42_P753215  |
| A_42_P679251  | Ascl2               | A_42_P679251  |
| A_44_P514939  | Bzrp                | A_44_P514939  |
| A_42_P712801  | 288436_Rn           | A_42_P712801  |
| A_44_P178448  | Srebf1              | A_44_P178448  |
| A_44_P358194  | Fmo3                | A_44_P358194  |
| A_44_P375616  | LOC287450           | A_44_P375616  |
| A_42_P570313  | 200786_Rn           | A_42_P570313  |
| A_44_P807424  | TC479765            | A_44_P807424  |
| A_44_P865406  | AW144075            | A_44_P865406  |
| A_44_P387246  | LOC363067           | A_44_P387246  |
| A_44_P1037972 | Ckmt1               | A_44_P1037972 |
| A_44_P1007613 | LOC302973           | A_44_P1007613 |
| A_44_P1029697 | BF524215            | A_44_P1029697 |
| A_44_P1011335 | LOC290704           | A_44_P1011335 |
| A_42_P828242  | 284844_Rn           | A_42_P828242  |
| A_44_P712688  | BF521617            | A_44_P712688  |
| A_42_P754122  | 298117_Rn           | A_42_P754122  |
| A_44_P547622  | AW914810            | A_44_P547622  |
| A_44_P259125  | BG667897            | A_44_P259125  |
| A_44_P978683  | TC494881            | A_44_P978683  |
| A_44_P337294  | Dci                 | A_44_P337294  |
| A_44_P547751  | Mss4                | A_44_P547751  |
| A_44_P173657  | LOC303504           | A_44_P173657  |
| A_44_P296468  | AI071174            | A_44_P296468  |
| A_44_P227655  | AI171249            | A_44_P227655  |



|               |               |               |
|---------------|---------------|---------------|
| A_44_P547801  | Gstt2         | A_44_P547801  |
| A_44_P132333  | H33079        | A_44_P132333  |
| A_44_P1059827 | AW143339      | A_44_P1059827 |
| A_44_P547745  | Mss4          | A_44_P547745  |
| A_44_P929396  | ENSRNOT000000 | A_44_P929396  |
| A_44_P945456  | TC480911      | A_44_P945456  |
| A_42_P538617  | Slb           | A_42_P538617  |
| A_44_P699044  | TC462243      | A_44_P699044  |
| A_44_P568805  | A_44_P568805  | A_44_P568805  |
| A_44_P215680  | LOC302278     | A_44_P215680  |
| A_44_P620106  | AW141699      | A_44_P620106  |
| A_44_P1030830 | LOC315963     | A_44_P1030830 |
| A_42_P721270  | Nfix          | A_42_P721270  |
| A_44_P1042216 | TC475670      | A_44_P1042216 |
| A_44_P1052607 | Aox1          | A_44_P1052607 |
| A_44_P669215  | TC486331      | A_44_P669215  |
| A_44_P799807  | BF398469      | A_44_P799807  |
| A_44_P1011898 | Gclm          | A_44_P1011898 |
| A_44_P603477  | AW920789      | A_44_P603477  |
| A_44_P237621  | Txnip         | A_44_P237621  |
| A_44_P1047441 | Lrp2          | A_44_P1047441 |
| A_42_P604900  | Cbx7          | A_42_P604900  |
| A_44_P835214  | CF111744      | A_44_P835214  |
| A_44_P592790  | TC491167      | A_44_P592790  |
| A_44_P521711  | Map2k6        | A_44_P521711  |
| A_44_P107535  | LOC292734     | A_44_P107535  |
| A_44_P809098  | TC499686      | A_44_P809098  |
| A_44_P812382  | ENSRNOT000000 | A_44_P812382  |
| A_44_P775708  | ENSRNOT000000 | A_44_P775708  |
| A_44_P807058  | Emp1          | A_44_P807058  |
| A_44_P992056  | LOC287722     | A_44_P992056  |
| A_44_P559466  | AI176773      | A_44_P559466  |
| A_44_P667896  | ENSRNOT000000 | A_44_P667896  |
| A_44_P761751  | TC483576      | A_44_P761751  |
| A_44_P1058692 | Angpt1        | A_44_P1058692 |
| A_42_P570241  | 288366_Rn     | A_42_P570241  |
| A_42_P624333  | 218643_Rn     | A_42_P624333  |
| A_44_P246846  | LOC362137     | A_44_P246846  |
| A_44_P476491  | BF567204      | A_44_P476491  |
| A_42_P460737  | 228478_Rn     | A_42_P460737  |
| A_44_P1046074 | BF551311      | A_44_P1046074 |
| A_44_P387604  | Cnp           | A_44_P387604  |
| A_44_P420343  | BF523202      | A_44_P420343  |
| A_44_P999071  | LOC289904     | A_44_P999071  |
| A_42_P685368  | 296512_Rn     | A_42_P685368  |
| A_44_P820780  | AW917383      | A_44_P820780  |
| A_43_P12236   | Oat           | A_43_P12236   |
| A_44_P518358  | LOC363398     | A_44_P518358  |
| A_42_P826853  | 294164_Rn     | A_42_P826853  |
| A_44_P1031737 | Pecr          | A_44_P1031737 |
| A_42_P822638  | Gilz          | A_42_P822638  |

|               |           |               |
|---------------|-----------|---------------|
| A_44_P545735  | Znf291    | A_44_P545735  |
| A_44_P364620  | AB096137  | A_44_P364620  |
| A_42_P690349  | 251419_Rn | A_42_P690349  |
| A_44_P178259  | LOC367884 | A_44_P178259  |
| A_43_P11683   | F3        | A_43_P11683   |
| A_44_P242321  | Acaa2     | A_44_P242321  |
| A_44_P445444  | MGC95092  | A_44_P445444  |
| A_44_P607386  | TC483849  | A_44_P607386  |
| A_43_P13875   | AA957779  | A_43_P13875   |
| A_44_P189793  | LOC361086 | A_44_P189793  |
| A_44_P165989  | LOC293043 | A_44_P165989  |
| A_44_P377670  | LOC313087 | A_44_P377670  |
| A_44_P250065  | CAR-XI    | A_44_P250065  |
| A_43_P12658   | Kcnh1     | A_43_P12658   |
| A_44_P638290  | BC086534  | A_44_P638290  |
| A_44_P684783  | TC487843  | A_44_P684783  |
| A_44_P226597  | Pycard    | A_44_P226597  |
| A_44_P109608  | Gsta2     | A_44_P109608  |
| A_44_P428914  | LOC360935 | A_44_P428914  |
| A_42_P629370  | Klf15     | A_42_P629370  |
| A_44_P561166  | TC477505  | A_44_P561166  |
| A_44_P960035  | TC470769  | A_44_P960035  |
| A_43_P11044   | CA507680  | A_43_P11044   |
| A_44_P343393  | Fxyd3     | A_44_P343393  |
| A_42_P573412  | 298574_Rn | A_42_P573412  |
| A_44_P158079  | CF111219  | A_44_P158079  |
| A_42_P821549  | 413380_Rn | A_42_P821549  |
| A_44_P1029298 | LOC361622 | A_44_P1029298 |
| A_44_P929767  | TC474477  | A_44_P929767  |
| A_44_P342289  | H19       | A_44_P342289  |
| A_44_P1040926 | LOC307096 | A_44_P1040926 |
| A_43_P11754   | AFAR      | A_43_P11754   |
| A_44_P612186  | BU760453  | A_44_P612186  |
| A_42_P540609  | LOC304353 | A_42_P540609  |
| A_44_P397472  | BQ205131  | A_44_P397472  |
| A_44_P171440  | Apoe      | A_44_P171440  |
| A_44_P335974  | Aldh1a4   | A_44_P335974  |
| A_44_P501724  | LOC363338 | A_44_P501724  |
| A_43_P10925   | AI409042  | A_43_P10925   |
| A_44_P873794  | TC513852  | A_44_P873794  |
| A_44_P1026641 | LOC298668 | A_44_P1026641 |
| A_44_P450343  | LOC363301 | A_44_P450343  |
| A_44_P977318  | TC499302  | A_44_P977318  |
| A_43_P19437   | BQ207374  | A_43_P19437   |
| A_44_P508348  | Ahnak     | A_44_P508348  |
| A_42_P836598  | 219357_Rn | A_42_P836598  |
| A_44_P262888  | LOC363366 | A_44_P262888  |
| A_44_P884109  | Trim2     | A_44_P884109  |
| A_44_P483089  | LOC363354 | A_44_P483089  |
| A_44_P503552  | Lrp16     | A_44_P503552  |
| A_44_P225834  | AW918854  | A_44_P225834  |

|              |               |              |
|--------------|---------------|--------------|
| A_42_P624195 | Gsta1         | A_42_P624195 |
| A_44_P807956 | TC486420      | A_44_P807956 |
| A_44_P668927 | TC483020      | A_44_P668927 |
| A_42_P685356 | 222043_Rn     | A_42_P685356 |
| A_43_P18376  | BF413197      | A_43_P18376  |
| A_44_P215056 | ltpr1         | A_44_P215056 |
| A_44_P929530 | TC465483      | A_44_P929530 |
| A_44_P808383 | TC491144      | A_44_P808383 |
| A_44_P266955 | Es2           | A_44_P266955 |
| A_42_P585995 | 216150_Rn     | A_42_P585995 |
| A_44_P121790 | LOC367529     | A_44_P121790 |
| A_44_P217726 | LOC308894     | A_44_P217726 |
| A_44_P242691 | Ptn           | A_44_P242691 |
| A_44_P822061 | LOC317020     | A_44_P822061 |
| A_44_P517591 | Eef2k         | A_44_P517591 |
| A_42_P607202 | Egfl3         | A_42_P607202 |
| A_44_P116591 | Cx3cl1        | A_44_P116591 |
| A_42_P506273 | Csad          | A_42_P506273 |
| A_44_P253380 | LOC367059     | A_44_P253380 |
| A_44_P900463 | TC491412      | A_44_P900463 |
| A_44_P157024 | LOC312016     | A_44_P157024 |
| A_44_P204001 | LOC367368     | A_44_P204001 |
| A_44_P541505 | LOC307681     | A_44_P541505 |
| A_44_P323951 | LOC307706     | A_44_P323951 |
| A_44_P227286 | LOC314570     | A_44_P227286 |
| A_44_P499029 | Fmo13         | A_44_P499029 |
| A_44_P790362 | Lot1          | A_44_P790362 |
| A_44_P638511 | BC087040      | A_44_P638511 |
| A_44_P295408 | LOC367529     | A_44_P295408 |
| A_44_P114184 | Ssg1          | A_44_P114184 |
| A_42_P839121 | Ece1          | A_42_P839121 |
| A_44_P236670 | LOC367494     | A_44_P236670 |
| A_44_P778069 | TC495125      | A_44_P778069 |
| A_44_P440944 | LOC361372     | A_44_P440944 |
| A_42_P656495 | 217522_Rn     | A_42_P656495 |
| A_44_P157014 | LOC363349     | A_44_P157014 |
| A_44_P747071 | TC494668      | A_44_P747071 |
| A_44_P300171 | LOC366959     | A_44_P300171 |
| A_44_P821386 | ENSRNOT000000 | A_44_P821386 |
| A_44_P868984 | TC482085      | A_44_P868984 |
| A_44_P534585 | LOC367673     | A_44_P534585 |
| A_44_P648513 | AI409900      | A_44_P648513 |
| A_42_P531078 | 384436_Rn     | A_42_P531078 |
| A_44_P407606 | LOC291888     | A_44_P407606 |
| A_44_P356526 | LOC296259     | A_44_P356526 |
| A_44_P596424 | TC500683      | A_44_P596424 |
| A_44_P753601 | A_44_P753601  | A_44_P753601 |
| A_44_P242694 | Ptn           | A_44_P242694 |
| A_44_P323936 | LOC296780     | A_44_P323936 |
| A_43_P14669  | AW141940      | A_43_P14669  |
| A_44_P328646 | LOC367511     | A_44_P328646 |

|               |           |               |
|---------------|-----------|---------------|
| A_44_P365286  | Aldh1a1   | A_44_P365286  |
| A_43_P13967   | Gsta2     | A_43_P13967   |
| A_44_P575816  | LOC316919 | A_44_P575816  |
| A_44_P358865  | LOC302083 | A_44_P358865  |
| A_44_P422144  | LOC363370 | A_44_P422144  |
| A_44_P183016  | LOC363360 | A_44_P183016  |
| A_44_P291028  | LOC362648 | A_44_P291028  |
| A_42_P522857  | 221670_Rn | A_42_P522857  |
| A_44_P135786  | LOC367513 | A_44_P135786  |
| A_44_P176606  | Itpr1     | A_44_P176606  |
| A_44_P114352  | LOC312002 | A_44_P114352  |
| A_44_P128737  | LOC316920 | A_44_P128737  |
| A_44_P166161  | Adh7      | A_44_P166161  |
| A_44_P149896  | LOC301978 | A_44_P149896  |
| A_44_P443367  | LOC363305 | A_44_P443367  |
| A_44_P128747  | LOC363422 | A_44_P128747  |
| A_44_P276916  | LOC363351 | A_44_P276916  |
| A_44_P295414  | LOC363371 | A_44_P295414  |
| A_44_P380218  | LOC366653 | A_44_P380218  |
| A_44_P124121  | LOC367527 | A_44_P124121  |
| A_44_P196997  | LOC363350 | A_44_P196997  |
| A_44_P227243  | LOC362136 | A_44_P227243  |
| A_44_P422152  | LOC363395 | A_44_P422152  |
| A_44_P464295  | LOC287849 | A_44_P464295  |
| A_44_P447781  | LOC301978 | A_44_P447781  |
| A_44_P455011  | LOC296777 | A_44_P455011  |
| A_44_P508906  | LOC363312 | A_44_P508906  |
| A_44_P133335  | LOC301906 | A_44_P133335  |
| A_44_P466345  | LOC360996 | A_44_P466345  |
| A_44_P208720  | LOC363374 | A_44_P208720  |
| A_44_P185294  | LOC363336 | A_44_P185294  |
| A_44_P295430  | LOC301985 | A_44_P295430  |
| A_44_P351963  | LOC312004 | A_44_P351963  |
| A_44_P398641  | LOC301986 | A_44_P398641  |
| A_44_P311917  | LOC316919 | A_44_P311917  |
| A_44_P609586  | TC516234  | A_44_P609586  |
| A_43_P12705   | Aldh3a1   | A_43_P12705   |
| A_44_P1034579 | LOC296130 | A_44_P1034579 |
| A_44_P269544  | LOC289197 | A_44_P269544  |
| A_44_P302476  | LOC363372 | A_44_P302476  |
| A_44_P302479  | LOC363424 | A_44_P302479  |
| A_42_P812805  | 413271_Rn | A_42_P812805  |
| A_44_P229677  | LOC363359 | A_44_P229677  |
| A_44_P152134  | LOC307687 | A_44_P152134  |
| A_44_P337930  | LOC287855 | A_44_P337930  |
| A_44_P827889  | BE108829  | A_44_P827889  |
| A_44_P1008888 | Mt3       | A_44_P1008888 |
| A_43_P11985   | Scya20    | A_43_P11985   |
| A_44_P485305  | LOC296782 | A_44_P485305  |
| A_44_P173437  | LOC317141 | A_44_P173437  |
| A_44_P375447  | LOC363424 | A_44_P375447  |

|              |           |              |
|--------------|-----------|--------------|
| A_44_P121796 | LOC363429 | A_44_P121796 |
| A_44_P183835 | Aldh3a1   | A_44_P183835 |
| A_42_P763157 | Cyp2t1    | A_42_P763157 |
| A_44_P103127 | LOC302199 | A_44_P103127 |
| A_44_P145065 | LOC363394 | A_44_P145065 |
| A_44_P163957 | LOC363343 | A_44_P163957 |
| A_44_P242690 | Ptn       | A_44_P242690 |
| A_44_P232076 | LOC363345 | A_44_P232076 |
| A_44_P685671 | TC497415  | A_44_P685671 |
| A_44_P255734 | LOC317091 | A_44_P255734 |
| A_43_P11804  | Ptn       | A_43_P11804  |
| A_44_P536905 | LOC363348 | A_44_P536905 |
| A_44_P859004 | BF551978  | A_44_P859004 |
| A_42_P688604 | Ces1      | A_42_P688604 |
| A_44_P699666 | TC479114  | A_44_P699666 |
| A_44_P184817 | Selenbp1  | A_44_P184817 |
| A_44_P321468 | LOC367677 | A_44_P321468 |
| A_44_P383005 | Al177431  | A_44_P383005 |
| A_43_P23287  | BF566100  | A_43_P23287  |
| A_44_P409632 | Olr1285   | A_44_P409632 |

| Sequence Description                                                                      | Accession    |
|-------------------------------------------------------------------------------------------|--------------|
| ated with NMBA                                                                            |              |
| ESTs                                                                                      | BG372060     |
| BTK6C3END keratin K6 gamma (carboxyterminal end) {Bos taurus;} , partial (36%) [TC470965] |              |
| similar to Protein:NP_034799 keratin complex 2, basic, gene 6b [Mus musculus]. sc         | CB548368     |
| S100 calcium-binding protein A8 (calgranulin A)                                           | NM_053822    |
| ESTs                                                                                      | AI101009     |
| Unknown                                                                                   |              |
| fibroblast growth factor 13                                                               | NM_053428    |
| CB605666 AMGNNUC:MRBE3-00079-C3-Z rat brain E15 (10374) Rattus norvegicus                 | CB605666     |
| cGMP dependent protein kinase type II                                                     | NM_013012    |
| Q9G8N9 (Q9G8N9) Orf504, partial (4%) [TC466956]                                           |              |
| Rattus norvegicus calcium channel, voltage-dependent, N type, alpha 1B subunit (C         | NM_147141    |
| Rattus norvegicus type I keratin KA11 (Ka11), mRNA [NM_001008750]                         | NM_001008750 |
| Rattus norvegicus homocysteine respondent protein HCYP2 (Hcyp2), mRNA.                    | NM_139342    |
| BM986564 EST594158 Rat gene index, normalized rat, norvegicus Rattus norvegicus           | BM986564     |
| ESTs                                                                                      | BI290340     |
| amphiregulin                                                                              | NM_017123    |
| neuregulin 1                                                                              | NM_031588    |
| ESTs                                                                                      | AA819397     |
| Unknown                                                                                   |              |
| R.rattus RNA for connexin protein Cx26.                                                   | X51615.1     |
| AGENCOURT_26756519 NIH_MGC_255 Rattus norvegicus cDNA clone IMAGE:7: CO396111             |              |
| Unknown                                                                                   |              |
| glutaredoxin                                                                              | NM_022278    |
| Rattus norvegicus similar to RIKEN cDNA 1700001E04 (LOC301215), mRNA [XM_                 | XM_217332    |
| Rattus norvegicus similar to RIKEN cDNA 1700001E04 (LOC363434), mRNA [XM_                 | XM_343756    |
| Rattus norvegicus similar to PITPNM family member 3; PYK2 N-terminal domain-int           | XM_343926    |
| ESTs, Weakly similar to K1CU RAT KERATIN, TYPE I CYTOSKELETAL 21 [R.non                   | BI286389     |
| Rattus norvegicus similar to apoptosis inhibitor 6 (LOC310693), mRNA [XM_                 | XM_227484    |
| Rattus norvegicus kallikrein 10 (Klk10), mRNA [NM_001004100]                              | NM_001004100 |
| S69000 laminin gamma 2 chain - mouse {Mus musculus;} , partial (6%) [TC474012]            |              |
| Rattus norvegicus similar to Cornifin alpha (Small proline-rich protein 1) (SPRR1) (L     | XM_345236    |
| UI-R-FS0-cqo-i-03-0-UI.s1 UI-R-FS0 Rattus norvegicus cDNA clone UI-R-FS0-cqo-             | CA508578     |
| similar to Protein:NP_075532 RAN binding protein 16 [Mus musculus]. score=4.014           | CB548265     |
| Rattus norvegicus chemokine (C-X-C motif) ligand 10 (Cxcl10), mRNA [NM_                   | NM_139089    |
| unknown function                                                                          | BM386666     |
| Rattus norvegicus cDNA clone MGC:94229 IMAGE:7131106, complete cds. [BC07:                | BC079185     |
| deoxyribonuclease I-like 3                                                                | NM_053907    |
| Rattus norvegicus similar to stefin A2 protein (LOC288070), mRNA [XM_                     | XM_221411    |
| Rattus norvegicus serine protease inhibitor B3 (Serpina3), mRNA [NM_001008887]            | NM_001008887 |
| Rattus norvegicus similar to RIKEN cDNA 1700001E04 (LOC367614), mRNA [XM_                 | XM_346227    |
| Rattus norvegicus similar to RIKEN cDNA C130090K23 (LOC305307), mRNA [XM_                 | XM_223359    |
| Unknown                                                                                   |              |
| ESTs, Highly similar to alpha-2,6-sialyltransferase [M.musculus]                          | AA901341     |
| carbonic anhydrase 2                                                                      | NM_019291    |
| Rattus norvegicus mRNA for keratin 14, partial cds.                                       | D63774       |
| unknown function                                                                          | BQ195790     |
| Rattus norvegicus similar to thymopsin (LOC292852), mRNA [XM_218649]                      | XM_218649    |
| ESTs                                                                                      | AA925727     |

Rattus norvegicus alpha-2u globulin PGCL3 (LOC259244), mRNA [NM\_147212] NM\_147212  
 ESTs AI234967  
 Rattus norvegicus similar to stefin A1 (LOC288074), mRNA [XM\_221416] XM\_221416  
 Rattus norvegicus similar to Glutaminyl-peptide cyclotransferase precursor (QC) (G XM\_233812  
 Rattus norvegicus similar to CTCL tumor antigen se57-1 (LOC291530), mRNA [XM XM\_225849  
 Rattus norvegicus keratin complex 1, acidic, gene 14 (Ka14), mRNA [NM\_0010087:NM\_001008751  
 Rattus norvegicus similar to laminin receptor-like protein LAMRL5 (LOC296257), mI XM\_230714  
 Rattus norvegicus similar to RIKEN cDNA 1700001E04 (LOC363379), mRNA [XM\_ XM\_343714  
 Rattus norvegicus similar to RIKEN cDNA 1700001E04 (LOC363409), mRNA [XM\_ XM\_343735  
 Rattus norvegicus tumor necrosis factor receptor superfamily, member 12a (Tnfrsf1 NM\_181086  
 Rattus norvegicus similar to SPRR3 (LOC310575), mRNA [XM\_227339] XM\_227339  
 Q8K394 (Q8K394) Phospholipase C-like 2, partial (6%) [TC466954]  
 Q89DR3 (Q89DR3) Blr7376 protein, partial (5%) [TC466008]  
 ESTs AW921971  
 EST352597 Rat gene index, normalized rat, norvegicus, Bento Soares Rattus norve AW921293  
 alpha(1)-inhibitor 3, variant I NM\_023103  
 Prepronociceptin (neuropeptide nociceptin) (N23K) NM\_013007  
 Inhibitor of DNA binding 1, helix-loop-helix protein (splice variation) NM\_012797  
 Rattus norvegicus similar to interferon-stimulated protein (LOC298693), mRNA [XM XM\_216605  
 F82896 ferrichrome ABC transporter (permease) UU400 [imported] - Ureaplasma urealyticum  
 Heat shock 27 kDa protein NM\_031970  
 HSVAKTI LEKTI precursor {Homo sapiens;} , partial (6%) [TC489988]  
 B-cell translocation gene 2, anti-proliferative NM\_017259  
 Rattus norvegicus Tocopherol transfer protein alpha (Ttpa), mRNA. NM\_013048  
 Rattus norvegicus similar to Fatty acid-binding protein, epidermal (E-FABP) (Cutane XM\_231258  
 ESTs AI535080  
 ESTs AI058645  
 protease, serine, 9 NM\_019175  
 Rattus norvegicus mal, T-cell differentiation protein 2 (Mal2), mRNA [NM\_198786] NM\_198786  
 Rattus norvegicus keratin K12 (Krt12), mRNA [NM\_001008761] NM\_001008761  
 FATTY ACID-BINDING PROTEIN, EPIDERMAL (E-FABP) (CUTANEOUS FATTY ACID- BINDING PF  
 serum-inducible kinase NM\_031821  
 prothymosin beta 10 NM\_021261  
 Unknown  
 Unknown  
 Rattus norvegicus similar to CGI-84 protein (LOC363720), mRNA [XM\_343995] XM\_343995  
 Unknown BC088265  
 Rattus norvegicus similar to RIKEN cDNA 2310046M08 (LOC304689), mRNA [XM\_ XM\_222495  
 Rattus norvegicus fetuin beta (Fetub), mRNA [NM\_053348] NM\_053348  
 CD36 antigen (collagen type I receptor, thrombospondin receptor)-like 2 NM\_054001  
 ESTs AW141081  
 Unknown  
 Rattus norvegicus similar to RIKEN cDNA 2900083L08 (LOC311450), mRNA [XM\_ XM\_230625  
 Rattus norvegicus similar to onzin (LOC360914), mRNA [XM\_341188] XM\_341188  
 CD24 antigen NM\_012752  
 ESTs BG667451  
 CD24 antigen NM\_012752  
 ESTs, Highly similar to CGE1 RAT G1/S-SPECIFIC CYCLIN E1 [R.norvegicus] AW913890  
 Rattus norvegicus SH2 domain protein 2A (Sh2d2a), mRNA [NM\_207605] NM\_207605  
 UI-R-FS0-cqo-i-03-0-UI.s1 UI-R-FS0 Rattus norvegicus cDNA clone UI-R-FS0-cqo- CA508578  
 Rattus norvegicus similar to M2 ribonucleotide reductase (LOC362720), mRNA [XIV XM\_343040

|                                                                                      |              |
|--------------------------------------------------------------------------------------|--------------|
| Annexin 1 (p35) (Lipocortin 1)                                                       | NM_012904    |
| Unknown                                                                              |              |
| transglutaminase 1, K polypeptide                                                    | NM_031659    |
| Rattus norvegicus similar to hypothetical protein FLJ33868 (LOC298186), mRNA [X      | XM_238399    |
| ESTs                                                                                 | BF545957     |
| Rattus norvegicus cystatin E/M (Cst6), mRNA [NM_133566]                              | NM_133566    |
| Rattus norvegicus similar to RIKEN cDNA A030007L17; EST AA673177 (LOC3623            | XM_342693    |
| ATP-binding cassette, sub-family C (CFTR/MRP), member 5                              | NM_053924    |
| ESTs                                                                                 | AA801255     |
| arachidonate 5-lipoxygenase                                                          | NM_012822    |
| GTP cyclohydrolase 1                                                                 | NM_024356    |
| Rattus norvegicus type I keratin KA17 (Ka17), mRNA [NM_212545]                       | NM_212545    |
| EST                                                                                  | AA900739     |
| similar to Protein:NP_077754 leucine aminopeptidase [Mus musculus]. score=1.5e-      | CB547318     |
| BQ035302 EST594274 Rat gene index, normalized rat, norvegicus Rattus norvegic        | BQ035302     |
| protein tyrosine phosphatase, non-receptor type 16                                   | AA817984     |
| Rattus norvegicus similar to glutaredoxin 1 (thioltransferase); glutaredoxin (LOC305 | XM_223806    |
| Rattus norvegicus mRNA, Axomer-4, transported in axons. [AB097854]                   | AB097854     |
| Rattus norvegicus similar to expressed sequence AI324246; DEAD-box protein abs       | XM_234436    |
| Integrin, beta 4                                                                     | NM_013180    |
| Rattus norvegicus cdig1L protein (Cdig1l), mRNA [NM_153623]                          | NM_153623    |
| Cyclin G1                                                                            | NM_012923    |
| gastric inhibitory polypeptide                                                       | NM_019630    |
| Unknown                                                                              |              |
| ESTs, Weakly similar to CYSTATIN ALPHA [R.norvegicus]                                | BE095788     |
| ESTs, Highly similar to DIAMINE ACETYLTRANSFERASE [M.musculus]                       | AI236332     |
| CB547318 AMGNNUC:MRPE4-00337-E6-A mrpe4 (10380) Rattus norvegicus cDN                | CB547318     |
| T-cell death associated gene                                                         | NM_017180    |
| Rattus norvegicus type II keratin Kb1 (Kb1), mRNA [NM_001008802]                     | NM_001008802 |
| adrenal secretory serine protease precursor                                          | NM_022630    |
| Rattus norvegicus similar to ubiquitin carboxyl-terminal hydrolase I3 (LOC366263), r | XM_215960    |
| Rattus norvegicus putative UA20 protein (Ua20), mRNA.                                | NM_144742    |
| Rattus norvegicus gap junction protein, beta 6 (connexin 30) (Gjb6), mRNA.           | NM_053388    |
| ESTs                                                                                 | AI411057     |
| Rattus norvegicus similar to N-acetylglucosaminyltransferase IVa (LOC367252), mF     | XM_346039    |
| glutaredoxin                                                                         | AI102927     |
| Rattus norvegicus clone UI-R-FJ0-cpy-e-21-0-UI unknown mRNA. [AY724514]              | AY724514     |
| VGF nerve growth factor inducible                                                    | NM_030997    |
| Rattus norvegicus antileukoproteinase-like 2 (Slpil2), mRNA [NM_001008872]           | NM_001008872 |
| Small inducible gene JE                                                              | NM_031530    |
| Rattus norvegicus similar to six transmembrane epithelial antigen of the prostate (L | XM_216315    |
| ESTs, Weakly similar to BCL3_HUMAN B-CELL LYMPHOMA 3-ENCODED PROT                    | BI289280     |
| Cyclin G1                                                                            | NM_012923    |
| BAC98235 (BAC98235) MKIAA1705 protein (Fragment), partial (19%) [TC483343]           |              |
| Rattus norvegicus coronin, actin binding protein 1A (Coro1a), mRNA.                  | NM_130411    |
| glia maturation factor beta                                                          | NM_031032    |
| Ornithine decarboxylase                                                              | NM_012615    |
| Solute carrier family 7 member A1 (amino acid transporter cationic 1)                | NM_013111    |
| similar to Protein:NP_062295 sequence similarity to Cig30 1 [Mus musculus]. score    | CB545140     |
| similar to Protein:NP_081740 RIKEN cDNA 5730469M10 [Mus musculus]. score=2.363e-     | 63           |
| Unknown                                                                              |              |



Rattus norvegicus similar to chromosome 14 open reading frame 50 (LOC299153), XM\_216741  
interleukin 18 NM\_019165  
similar to Protein:NP\_058614 nudix (nucleoside diphosphate linked moiety X)-type I BQ196556  
Rattus norvegicus similar to p57kip2 (LOC361683), mRNA [XM\_341966] XM\_341966  
arginase 1, liver NM\_017134  
hypoxia inducible factor 1, alpha subunit NM\_024359  
Unknown  
Annexin 1 (p35) (Lipocortin 1) NM\_012904  
Rattus norvegicus similar to B99 protein (LOC300126), mRNA [XM\_217016] XM\_217016  
Interleukin 1 beta NM\_031512  
Rattus norvegicus similar to Neighbor of A-kinase anchoring protein 95 (LOC29872 XM\_233763  
Rattus norvegicus similar to Bleomycin hydrolase (BLM hydrolase) (BMH) (BH) (LO XM\_213406  
Rattus norvegicus similar to SPRR1b (LOC365847), mRNA [XM\_345235] XM\_345235  
Rattus norvegicus similar to TATA box binding protein (TBP)-associated factor, RN/ XM\_227586  
Rattus norvegicus similar to RIKEN cDNA 1700001E04 (LOC302192), mRNA [XM\_ XM\_217539  
ESTs AW914028  
Unknown  
Rattus norvegicus similar to Cytosol aminopeptidase (Leucine aminopeptidase) (LA XM\_226118  
Rattus norvegicus similar to ATP-binding cassette sub-family E member 1 (RNase I XM\_341669  
Oncomodulin BF417236  
Unknown  
Activating transcription factor 3 NM\_012912  
Unknown  
Unknown  
Rattus norvegicus similar to ThB gene product (LOC315075), mRNA [XM\_235420] XM\_235420  
claudin 1 NM\_031699  
thioredoxin reductase 1 NM\_031614  
NEFA precursor NM\_021663  
similar to data source:SPTR, source key:Q21882, evidence:ISS~putative~related to BM387540  
Rattus norvegicus Tumor necrosis factor receptor superfamily, member 6 (Tnfrsf6), NM\_139194  
Unknown  
Rattus norvegicus similar to origin recognition complex subunit 6 (LOC291927), mR XM\_214656  
NG,NG dimethylarginine dimethylaminohydrolase NM\_022297  
Rattus norvegicus similar to interleukin-1 homolog 1 (LOC296541), mRNA [XM\_231 XM\_231099  
Rattus norvegicus similar to putative transcription factor ALF-4 (LOC303132), mRN. XM\_220420  
ESTs BF566249  
Rattus norvegicus similar to CG14803-PA (LOC313108), mRNA [XM\_232837] XM\_232837  
Rattus norvegicus similar to Eif1a gene (LOC317163), mRNA [NM\_001008773] NM\_001008773  
ubiquitin-conjugating enzyme E2N (homologous to yeast UBC13) NM\_053928  
Rattus norvegicus similar to RIKEN cDNA 1700001E04 (LOC363386), mRNA [XM\_ XM\_343721  
Rattus norvegicus hypothetical LOC290595 (LOC290595), mRNA [XM\_237967] XM\_237967  
Rattus norvegicus similar to RIKEN cDNA 2410017I18 (MGC72611), mRNA [NM\_1 NM\_199387  
Rattus norvegicus similar to protein related with psoriasis (LOC365217), mRNA [XM XM\_344871  
ESTs BG670036  
Rattus norvegicus collagen, type XVIII, alpha 1 (Col18a1), mRNA [XM\_241632] XM\_241632  
ureidopropionase, beta NM\_053845  
DEPA0489 Rat Lambda ZAP Express Library Rattus norvegicus cDNA 5', mRNA se BE126741  
CCAAT/enhancerbinding, protein (C/EBP) delta NM\_013154  
Prion protein, structural NM\_012631  
similar to evidence:NAS~hypothetical protein~putative BQ203423  
Rattus norvegicus collagen, type XVIII, alpha 1 (Col18a1), mRNA [XM\_241632] XM\_241632

|                                                                                     |              |
|-------------------------------------------------------------------------------------|--------------|
| myosin IB                                                                           | NM_053986    |
| WNT1 inducible signaling pathway protein 1                                          | NM_031716    |
| potassium inwardly-rectifying channel, subfamily J, member 12                       | NM_053981    |
| sphingomyelin phosphodiesterase 3, neutral                                          | NM_053605    |
| Rattus norvegicus similar to hypothetical protein FLJ13448 (MGC109115), mRNA [I     | NM_001009671 |
| Rattus norvegicus similar to N-acetyltransferase 5 (LOC362228), mRNA [XM_3425       | XM_342534    |
| plasminogen activator inhibitor 2 type A                                            | NM_021696    |
| Rattus norvegicus similar to Hypothetical protein MGC48332 (MGC94648), mRNA [       | NM_001007759 |
| Unknown                                                                             |              |
| Unknown                                                                             |              |
| Rattus norvegicus sphingomyelin phosphodiesterase 1, acid lysosomal (Smpd1), m      | NM_001006997 |
| Rattus norvegicus similar to RIKEN cDNA 1700001E04 (LOC360998), mRNA [XM_           | XM_341273    |
| Rattus norvegicus similar to p120E4F (LOC287114), mRNA [XM_213244]                  | XM_213244    |
| FAT tumor suppressor (Drosophila) homolog                                           | NM_031819    |
| Rattus norvegicus origin recognition complex, subunit 1-like (S.cereviaiae) (Orc1), | NM_177931    |
| Unknown                                                                             |              |
| Rattus norvegicus similar to RIKEN cDNA 2210008A03 gene (LOC314438), mRNA XM_       | XM_234532    |
| similar to GCGPROT:IBP4_RAT INSULIN-LIKE GROWTH FACTOR BINDING PRC CA512073         |              |
| Rattus norvegicus similar to peptidylprolyl isomerase D (cyclophilin D) (LOC293880  | XM_219771    |
| ESTs, Weakly similar to LEG9 RAT GALECTIN-9 [R.norvegicus]                          | BE095833     |
| Rattus norvegicus esophagus cancer-related protein 2 (Ecg2), mRNA [NM_001002        | NM_001002816 |
| acute myeloid leukemia 1                                                            | NM_017325    |
| Rattus rattus mRNA encoding brain serine protease bsp2, partial.                    | AJ005642.1   |
| ESTs                                                                                | BF551228     |
| Insulin degrading enzyme                                                            | NM_013159    |
| Rattus norvegicus similar to interleukin-1 delta (LOC311783), mRNA [XM_231101]      | XM_231101    |
| ESTs, Highly similar to T08764 hypothetical protein DKFZp586C021.1 [H.sapiens]      | AI009167     |
| ESTs, Weakly similar to T18810 hypothetical protein C01F6.9 - Caenorhabditis elec   | AW140738     |
| ESTs                                                                                | BF409122     |
| Rattus norvegicus RAB21, member RAS oncogene family (Rab21), mRNA [NM_00            | NM_001004238 |
| aquaporin 3                                                                         | NM_031703    |
| gastric inhibitory polypeptide                                                      | NM_019630    |
| Rattus norvegicus hypothetical LOC291608 (LOC291608), mRNA [XM_214562]              | XM_214562    |
| ESTs                                                                                | BF288942     |
| profilin II                                                                         | NM_030873    |
| Unknown                                                                             |              |
| Rattus norvegicus carboxylesterase isoenzyme gene (LOC246252), mRNA [NM_14          | NM_144743    |
| Q7M5K8 (Q7M5K8) E3 CR1-gamma1, partial (6%) [TC473591]                              |              |
| Rattus norvegicus similar to hypothetical protein FLJ13194 (LOC288108), mRNA [X     | XM_213624    |
| similar to Protein:NP_444317 epithelial mitogen; RIKEN cDNA 2310069M11 gene [I      | CB546693     |
| ESTs                                                                                | AW917160     |
| Rattus norvegicus similar to suprabasin; suprabasal-specific protein suprabasin (LC | XM_214902    |
| Cell surface glycoprotein CD44 (hyaluronate binding protein)                        | NM_012924    |
| Rattus norvegicus MT-protocadherin (KIAA1775), mRNA.                                | NM_053572    |
| Rattus norvegicus protein phosphatase 1, regulatory subunit 7 (Ppp1r7), mRNA [N     | NM_001009825 |
| mitogen-activated protein kinase 6                                                  | NM_031622    |
| Unknown                                                                             |              |
| Rattus norvegicus similar to expressed sequence AU040575 (LOC288003), mRNA          | XM_213598    |
| neutral solute channel aquaporin 9                                                  | NM_022960    |
| Rattus norvegicus similar to Selenoprotein T (LOC365802), mRNA [XM_345215]          | XM_345215    |
| Interleukin 1 beta                                                                  | NM_031512    |



Rattus norvegicus keratin 5 (epidermolysis bullosa simplex, Dowling-Meara/Kobner), mRNA [NM\_183333] AW144721  
 ESTs  
 Rattus norvegicus similar to RIKEN cDNA 1300002C08 gene (LOC310291), mRNA [XM\_227007]  
 Rattus norvegicus similar to 3-5 exonuclease TREX2 (LOC309275), mRNA [XM\_219746]  
 estrogen-responsive uterine transcript U53184  
 Rattus norvegicus similar to CD2 antigen family, member 10; CD84-H1 precursor (LOC213932) XM\_213932  
 Alpha-2-macroglobulin NM\_012488  
 activated leukocyte cell adhesion molecule NM\_031753  
 Rattus norvegicus similar to RIKEN cDNA 2810037C03 (LOC290842), mRNA [XM\_214380]  
 Rattus norvegicus similar to glandular kallikrein KLK13 (LOC292848), mRNA [XM\_218643]  
 ESTs BG663446  
 ESTs, Weakly similar to COPP RAT COATOMER BETA' SUBUNIT [R.norvegicus] AW915941  
 Rattus norvegicus cyclin D1 (Ccmd1), mRNA [NM\_171992] NM\_171992  
 Rattus norvegicus similar to 5830411E10Rik protein (LOC363227), mRNA [XM\_343565] XM\_343565  
 Annexin A3 NM\_012823  
 Caspase 3, apoptosis related cysteine protease (ICE-like cysteine protease) NM\_012922  
 Rattus norvegicus similar to hypothetical protein D10Erd438e (LOC294400), mRNA [XM\_215387]  
 Rattus norvegicus protein phosphatase 1, regulatory (inhibitor) subunit 2 (Ppp1r2), mRNA [NM\_138823]  
 Rattus norvegicus similar to Putative protein C21orf45 (LOC288272), mRNA [XM\_221670]  
 ESTs AI411057  
 Rattus norvegicus similar to Ariadne-1 protein homolog (ARI-1) (Ubiquitin-conjugation) XM\_217157  
 Rattus norvegicus similar to profilaggrin (LOC295188), mRNA [XM\_238235] XM\_238235  
 Rattus norvegicus similar to mKIAA1921 protein (LOC298867), mRNA [XM\_233955] XM\_233955  
 Rattus norvegicus similar to karyopherin beta 3; Ran\_GTP binding protein 5; importin XM\_224534  
 Rattus norvegicus similar to phosphomannomutase Sec53p homolog (MGC105960) NM\_001008323  
 heat shock 70kD protein 8 NM\_024351  
 early growth response 2 NM\_053633  
 solute carrier family 8 (cationic amino acid transporter, y+ system), member 7 NM\_053442  
 CD81 antigen (target of antiproliferative antibody 1) NM\_013087  
 Rattus norvegicus similar to N-terminal acetyltransferase 1 (LOC310399), mRNA [XM\_241375]  
 AAQ62444 (AAQ62444) At1g59840, partial (6%) [TC475519] BC088291  
 RAB11a, member RAS oncogene family NM\_031152  
 Rattus norvegicus similar to 14-3-3 protein sigma (LOC313017), mRNA [XM\_23274] XM\_232745  
 Rattus norvegicus similar to leprecan-like 1 protein (LOC288016), mRNA [XM\_213603] XM\_213603  
 Rattus norvegicus hypothetical LOC287938 (LOC287938), mRNA [XM\_213567] XM\_213567  
 casein kinase II beta subunit NM\_031021  
 Rattus norvegicus similar to PTK9 protein tyrosine kinase 9 (MGC105817), mRNA [NM\_001008521]  
 Rattus norvegicus hypoxanthine guanine phosphoribosyl transferase (Hprt), mRNA [NM\_012583]  
 similar to Protein:NP\_079586 ectoplacental cone, invasive trophoblast giant cells, embryonic CB546560  
 Rattus norvegicus homolog of C. elegans smu-1 (Smu-1), mRNA. NM\_057195  
 similar to Protein:NP\_031988 epithelial V-like antigen [Mus musculus]. score=8.421 CB547029  
 Rattus norvegicus similar to CG9646-PA (LOC362974), mRNA [XM\_343304] XM\_343304  
 Rattus norvegicus cytokine inducible kinase (Cnk), mRNA [XM\_342888] XM\_342888  
 Rattus norvegicus similar to Ubiquitin carboxyl-terminal hydrolase isozyme L3 (UCHL3) XM\_345541  
 Rattus norvegicus similar to Heat shock cognate 71 kDa protein (LOC298615), mRNA [XM\_237706]  
 Rattus norvegicus protein phosphatase 1, regulatory subunit 7 (Ppp1r7), mRNA [NM\_001009825]  
 Rattus norvegicus similar to RIKEN cDNA 2810405J04 (LOC313873), mRNA [XM\_233872]  
 similar to Protein:NP\_079781 RIKEN cDNA 1700030G05 gene [Mus musculus]. score BQ196655  
 ESTs AI102061  
 Rattus norvegicus similar to amyotrophic lateral sclerosis 2 chromosome region candidate XM\_343579  
 ESTs, Weakly similar to COPP RAT COATOMER BETA' SUBUNIT [R.norvegicus] AI535535

|                                                                                                        |              |
|--------------------------------------------------------------------------------------------------------|--------------|
| Rattus norvegicus MAP-kinase phosphatase (cpg21) (Cpg21), mRNA.                                        | NM_133578    |
| hypoxia inducible factor 1, alpha subunit                                                              | NM_024359    |
| Rattus norvegicus solute carrier family 35, member B2 (Slc35b2), mRNA [NM_199111 NM_199111]            | NM_199111    |
| Rattus norvegicus similar to heat shock protein 65 (LOC302026), mRNA [XM_229556 XM_229566]             | XM_229566    |
| RAB7, member RAS oncogene family                                                                       | NM_023950    |
| nucleolar phosphoprotein p130                                                                          | NM_022869    |
| UDP-Gal:betaGlcNAc beta 1,4-galactosyltransferase, polypeptide 1                                       | BF287204     |
| prolyl endopeptidase                                                                                   | NM_031324    |
| Rattus norvegicus SH3-domain kinase binding protein 1 (Sh3kbp1), mRNA [NM_053360 NM_053360]            | NM_053360    |
| Rattus norvegicus similar to beta-actin (LOC302340), mRNA [XM_228468 XM_228468]                        | XM_228468    |
| Rattus norvegicus tetratricopeptide repeat domain 12 (Ttc12), mRNA [NM_001004246 NM_001004246]         | NM_001004246 |
| ESTs                                                                                                   | BF564888     |
| Unknown                                                                                                |              |
| Rattus norvegicus similar to Alcohol dehydrogenase class IV (Retinol dehydrogenase)                    | XM_215715    |
| general transcription factor IIB                                                                       | NM_031041    |
| Rattus norvegicus similar to Heat shock cognate 71 kDa protein (LOC295698), mRNA [XM_230045 XM_230045] | XM_230045    |
| Rattus norvegicus similar to GABA(A) receptor-associated protein like 2; gangliosid                    | XM_345534    |
| Rattus norvegicus interleukin 24 (Il24), mRNA.                                                         | NM_133311    |
| ESTs                                                                                                   | AW143025     |
| jun B proto-oncogene                                                                                   | NM_021836    |
| Rattus norvegicus similar to Myosin regulatory light chain 2-A, smooth muscle isofo                    | XM_343643    |
| ESTs, Highly similar to LCB1 MOUSE SERINE PALMITOYLTRANSFERASE 1 [M.r                                  | AW915327     |
| Rattus norvegicus similar to ETS-domain protein ELK-3 (ETS-related protein NET) (                      | XM_343198    |
| Rattus norvegicus similar to bile acid beta-glucosidase; glucosidase, beta (bile acid)                 | XM_216490    |
| Rattus norvegicus Unknown (protein for MGC:72614) (MGC72614), mRNA [NM_1919105 NM_1919105]             | NM_1919105   |
| latexin                                                                                                | NM_031655    |
| ESTs                                                                                                   | AI137483     |
| tissue inhibitor of metalloproteinase 1                                                                | NM_053819    |
| CB547894 AMGNNUC:MRPE4-00121-A8-A mrpe4 (10380) Rattus norvegicus cDN                                  | CB547894     |
| Rattus norvegicus eukaryotic translation initiation factor 4 gamma, 2 (Eif4g2), mRN                    | XM_341906    |
| Unknown                                                                                                |              |
| CD24 antigen                                                                                           | AA924066     |
| ESTs                                                                                                   | BF284739     |
| unknown function                                                                                       | CA340030     |
| protein tyrosine phosphatase 4a1                                                                       | NM_031579    |
| ubiquilin 1                                                                                            | NM_053747    |
| ESTs, Weakly similar to S58222 PQ-rich protein [H.sapiens]                                             | AI029402     |
| Rattus norvegicus similar to Eukaryotic translation initiation factor 5 (eIF-5) (LOC30                 | XM_229097    |
| Rattus norvegicus similar to Hsc70-ps1 (LOC300332), mRNA [XM_235792 XM_235792]                         | XM_235792    |
| Rattus norvegicus similar to Asparaginyl-tRNA synthetase, cytoplasmic (Asparagine                      | XM_214554    |
| Rattus norvegicus similar to hypothetical protein MGC4614 (LOC294294), mRNA [XM_215357 XM_215357]      | XM_215357    |
| Rattus norvegicus solute carrier family 20 (phosphate transporter), member 1 (Slc20                    | NM_031148    |
| Rattus norvegicus O6-methylguanine-DNA methyltransferase (Mgmt), mRNA.                                 | NM_012861    |
| karyopherin (importin) alpha 2                                                                         | NM_053483    |
| R.rattus RYD5 mRNA for a potential ligand-binding protein.                                             | X60661.1     |
| Rattus norvegicus similar to Heat shock cognate 71 kDa protein (LOC306432), mRN                        | XM_224805    |
| heat shock 27kD protein 3                                                                              | NM_031750    |
| Rattus norvegicus similar to DNA segment, Chr 12, ERATO Doi 551, expressed (LC                         | XM_343454    |
| UDP-Gal:betaGlcNAc beta 1,4-galactosyltransferase, polypeptide 6                                       | NM_031740    |
| Rattus norvegicus similar to Alpha enolase (2-phospho-D-glycerate hydro-lyase) (N                      | XM_232686    |
| vesicle-associated membrane protein 5                                                                  | NM_053555    |



UDP-Gal:betaGlcNAc beta 1,4-galactosyltransferase, polypeptide 1 BF287204  
 Rattus norvegicus kinase (LOC246273), mRNA. NM\_144755  
 Rattus norvegicus similar to KIAA1411 protein (LOC367235), mRNA [XM\_346029] XM\_346029  
 histidine ammonia lyase NM\_017159  
 Rattus norvegicus uk mRNA for uridine kinase, partial cds. BQ207631  
 Rattus norvegicus similar to karyopherin (importin) alpha 2 (LOC307465), mRNA [X XM\_225973  
 similar to Protein:NP\_006306 ring finger protein 3 [Homo sapiens]. score=9.643e-4 BM389990  
 ubiquitin D NM\_053299  
 casein kinase II, alpha 1 polypeptide NM\_053824  
 Unknown  
 ERM-binding phosphoprotein NM\_021594  
 Rattus norvegicus similar to Shb-like adapter protein, Shf - human (LOC362205), m XM\_342507  
 ALG-2 interacting protein 1 AF192757  
 similar to Protein:NP\_077754 leucine aminopeptidase [Mus musculus]. score=7.292 CB605705  
 Proliferating cell nuclear antigen NM\_022381  
 Rattus norvegicus similar to cellular apoptosis susceptibility protein (LOC362273), r XM\_342581  
 similar to Protein:NP\_080251 T-complex associated-testis-expressed 1-like [Mus m CA333739  
 Rattus norvegicus SAR1a gene homolog 1 (Sara1), mRNA [NM\_001007739] NM\_001007739  
 ESTs, Weakly similar to T18810 hypothetical protein C01F6.9 - Caenorhabditis eleg AW140738  
 unknown function BQ207103  
 Rattus norvegicus similar to hypothetical protein FLJ10737 (LOC362666), mRNA [X XM\_342983  
 Rattus norvegicus similar to putative MAPK activating protein (LOC361089), mRNA XM\_341374  
 similar to mouse ATP/GTP-binding protein, clone MGC:6658 IMAGE:3497802, mRI BQ205859  
 Rattus norvegicus selectin, endothelial cell (Sele), mRNA [NM\_138879] NM\_138879  
 Unknown  
 Unknown  
 Rattus norvegicus similar to hypothetical protein MGC10120 (LOC293938), mRNA | XM\_215245  
 Rattus norvegicus similar to D7Wsu128e protein (LOC293454), mRNA [XM\_21505: XM\_215053  
 ESTs AI146082  
 DnaJ-like protein NM\_022934  
 protein tyrosine phosphatase, receptor type, W NM\_033099  
 nuclear receptor subfamily 4, group A, member 3 NM\_031628  
 ESTs, Weakly similar to PTH\_YEAST PUTATIVE PEPTIDYL-TRNA HYDROLASE | BG378435  
 Rattus norvegicus cDNA, clone:ba7, differentially expressed in pylorus. AB072252.1  
 Rattus norvegicus similar to hypothetical protein 6030430O11 (LOC308999), mRNA/ XM\_219356  
 RAN, member RAS oncogene family NM\_053439  
 core1 UDP-galactose:N-acetylgalactosamine-alpha-R beta 1,3-galactosyltransferas NM\_022950  
 thioredoxin-like 2 NM\_032614  
 histone 2b NM\_022647  
 Annexin 1 (p35) (Lipocortin 1) AI171962  
 Rattus norvegicus similar to Eukaryotic translation initiation factor 5 (eIF-5) (LOC29: XM\_212955  
 Rattus norvegicus similar to MHR23B (LOC298012), mRNA [XM\_216381] XM\_216381  
 Heme oxygenase NM\_012580  
 Rattus norvegicus similar to RIKEN cDNA 3110050N22 (LOC310244), mRNA [XM\_ XM\_226971  
 Annexin A3 NM\_012823  
 UI-R-A1-er-c-02-0-UI.r1 UI-R-A1 Rattus norvegicus cDNA clone UI-R-A1-er-c-02-0- BF556341  
 ESTs, Moderately similar to A Chain A, Crystal Structure Of P681h Mutant Of Tir Dc AW526982  
 Rattus norvegicus putative 28 kDa protein (LOC289809), mRNA [NM\_199083] NM\_199083  
 Rattus norvegicus similar to vaccinia related kinase 2; vaccinia virus BIR kinase relat XM\_341265  
 Q90LX2 (Q90LX2) Envelope protein, partial (21%) [TC462789]  
 Rattus norvegicus similar to hypothetical protein FLJ23468 (LOC306464), mRNA [X XM\_224859

ESTs BF558513  
Rattus norvegicus similar to heat shock protein 86 (LOC290187), mRNA [XM\_2141 XM\_214168  
Rattus norvegicus RAB21, member RAS oncogene family (Rab21), mRNA [NM\_00 NM\_001004238  
Rattus norvegicus similar to p53 apoptosis-associated target (LOC292949), mRNA XM\_214953  
Rattus norvegicus similar to RIKEN cDNA 2410008G02 (LOC291874), mRNA [XM\_XM\_214639  
Rattus norvegicus similar to U6 snRNA-associated Sm-like protein LSm1 (Small nu XM\_344536  
phosphatidylcholine transfer protein NM\_017225  
Malic enzyme 1, soluble NM\_012600  
acidic calponin NM\_019359  
Rattus norvegicus guanine nucleotide binding protein gamma 12 subunit mRNA, pa AF022091  
Rattus norvegicus similar to Tex27 protein (LOC361816), mRNA [XM\_342109] XM\_342109  
Glycerol-3-phosphate dehydrogenase 2 (mitochondrial) NM\_012736  
Lysosomal-associated membrane protein 2 NM\_017068  
Rattus norvegicus similar to RIKEN cDNA 2610318G18 (LOC289113), mRNA [XM\_XM\_222742  
14-3-3 protein gamma-subtype NM\_019376  
Apolipoprotein D NM\_012777  
Rattus norvegicus origin recognition complex, subunit 4-like (yeast) (Orc4l), mRNA NM\_199092  
Microvascular endothelial differentiation gene 1 NM\_012699  
Q8V9S8 (Q8V9S8) L09SL protein, partial (11%) [TC496731]  
Rattus norvegicus similar to mind bomb (LOC307594), mRNA [XM\_226175] XM\_226175  
ESTs AW916469  
Rattus norvegicus similar to CD2 antigen (cytoplasmic tail) binding protein 2 (LOC2: XM\_215082  
growth factor binding protein-1 NM\_022603  
Rattus norvegicus heat shock protein 1, alpha (Hspca), mRNA [NM\_175761] NM\_175761  
Rattus norvegicus similar to Hypothetical protein LOC216150 (LOC365006), mRNA XM\_344770  
ESTs AI232346  
ESTs AI179448  
Rattus norvegicus eukaryotic translation initiation factor 4 gamma, 2 (Eif4g2), mRNA, XM\_341906  
peroxiredoxin 1 NM\_057114  
Rattus norvegicus similar to cyclin-dependent kinase inhibitor 3; CDK2-associated c XM\_214152  
Rattus norvegicus similar to Alpha enolase (2-phospho-D-glycerate hydro-lyase) (N XM\_214330  
Unknown  
Rattus norvegicus similar to mitochondrial ribosomal protein L51; mitochondrial ribo XM\_216269  
Rattus norvegicus similar to proliferating cell nuclear antigen (LOC364102), mRNA XM\_344211  
ESTs, Highly similar to SNX8\_HUMAN SORTING NEXIN 8 [H.sapiens] BF405030  
Rattus norvegicus similar to a disintegrin-like and metalloprotease with thrombospoi XM\_232202  
thymidylate synthase NM\_019179  
ESTs AW143475  
Rattus norvegicus signal recognition particle 54 kDa (Srp54), mRNA [XM\_343063] XM\_343063  
Rattus norvegicus basic leucine zipper and W2 domains 1 (Bzw1), mRNA [NM\_198 NM\_198789  
Rattus norvegicus similar to Tardbp protein (LOC298648), mRNA [XM\_216578] XM\_216578  
Rattus norvegicus similar to D7Wsu128e protein (LOC293454), mRNA [XM\_21505: XM\_215053  
Unknown  
schlafen 4 NM\_053687  
Rattus norvegicus similar to Dual specificity protein phosphatase 11 (RNA/RNP con XM\_216196  
Rattus norvegicus vascular early response gene protein (Verge), mRNA [NM\_0010 NM\_001003403  
BC043034 Eif4g2 protein {Mus musculus;} , partial (20%) [TC464649]  
Q7PWX9 (Q7PWX9) EbiP4168 (Fragment), partial (21%) [TC508253]  
CB545107 AMGNNUC:NRDG1-00131-A4-A nrdg1 (10855) Rattus norvegicus cDN, CB545107  
Unknown  
Unknown



Rattus norvegicus similar to heat shock protein 70 cognate (LOC307084), mRNA [X XM\_225521  
 Rattus norvegicus osmotic stress protein 94 kDa (OSP94), mRNA [XM\_215549] XM\_215549  
 Rattus norvegicus similar to Alpha enolase (2-phospho-D-glycerate hydro-lyase) (N XM\_219757  
 mesothelin NM\_031658  
 Rattus norvegicus similar to enolase 1, alpha (LOC300491), mRNA [XM\_235993] XM\_235993  
 Unknown  
 Rattus norvegicus solute carrier family 20 (phosphate transporter), member 1 (Slc21 NM\_031148  
 Unknown  
 ESTs, Weakly similar to T29201 hypothetical protein T03F1.1 - Caenorhabditis eleg BF550568  
 Hras-revertant gene 107 NM\_017060  
 EST292128 Normalized rat ovary, Bento Soares Rattus sp. cDNA clone RGICT53 5 AW142013  
 Rattus norvegicus similar to Alpha enolase (2-phospho-D-glycerate hydro-lyase) (N XM\_224813  
 Unknown  
 Eph receptor B2 (ELK-related protein tyrosine kinase) M59814  
 Rattus norvegicus liver regeneration p-53 related protein (LOC246046), mRNA. NM\_139189  
 heat shock 70kD protein 8 NM\_024351  
 Unknown  
 Unknown  
 eukaryotic translation initiation factor 4E NM\_053974  
 ubiquitin-conjugating enzyme E2D 3 (homologous to yeast UBC4/5) NM\_031237  
 Unknown  
 Rattus norvegicus similar to TOPK (LOC290326), mRNA [XM\_224300] XM\_224300  
 heat shock 70kD protein 8 NM\_024351  
 Rattus norvegicus secretory carrier membrane protein 1 (Scamp1), mRNA [XM\_342 XM\_342174  
 ADP-ribosylation factor related protein 1 NM\_053980  
 Rattus norvegicus similar to Hspca protein (LOC314540), mRNA [XM\_234728] XM\_234728  
 Rattus norvegicus similar to CDNA sequence BC019977 (LOC298530), mRNA [XM XM\_238415  
 ESTs AI178573  
 Rattus norvegicus similar to protein kinase (EC 2.7.1.-) esk splice form 2 - mouse (L XM\_236477  
 Rattus norvegicus lysophospholipase (LOC246266), mRNA [NM\_144750] NM\_144750  
 ESTs, Weakly similar to AF154572 1 ERG2 protein [R.norvegicus] AA819034  
 YME1 (S.cerevisiae)-like 1 NM\_053682  
 Rattus norvegicus GTP-ase Ran mRNA, complete cds. [AF507943] AF507943  
 Rattus norvegicus mini chromosome maintenance deficient 6 (S. cerevisiae) (Mcmc XM\_344135  
 ESTs, Weakly similar to JU0271 voltage-sensitive potassium channel protein - rat [F BF286190  
 Rattus norvegicus similar to SEC63 (LOC309858), mRNA [XM\_228305] XM\_228305  
 ESTs AA819659  
 Rattus norvegicus cyclophilin D mRNA, nuclear gene encoding mitochondrial protei NM\_172243  
 Hras-revertant gene 107 NM\_017060  
 Rattus norvegicus cDNA clone IMAGE:7107662, containing frame-shift errors. [BCC BC081794  
 Rattus norvegicus similar to RAN protein (LOC313163), mRNA [XM\_232914] XM\_232914  
 Enolase 1, alpha NM\_012554  
 ESTs, Weakly similar to S27393 sphingomyelin phosphodiesterase (EC 3.1.4.12), 5 BF560542  
 Rattus norvegicus monoamine oxidase A (Maoa), mRNA [XM\_343764] XM\_343764  
 Rattus norvegicus similar to RIKEN cDNA 1810036I24 (LOC309146), mRNA [XM\_2 XM\_219680  
 Rattus norvegicus thymocyte protein thy28 (MGC72984), mRNA [NM\_001007661] NM\_001007661  
 Unknown  
 Unknown  
 Rattus norvegicus similar to RIKEN cDNA 5730596K20 (LOC309187), mRNA [XM\_ XM\_219541  
 Rat hepatic steroid hydroxylase IIA2 (CYP2A2) gene, exons 1 and 2. M33313  
 ESTs BF550562

Rattus norvegicus eukaryotic translation initiation factor 2, subunit 2 beta, 38kDa (E NM\_199380  
 Rattus norvegicus similar to peroxiredoxin 1 (LOC294660), mRNA [XM\_212921] XM\_212921  
 Rat hepatic steroid hydroxylase IIA2 (CYP2A2) gene, exons 1 and 2. M33313  
 ATPase, Ca<sup>++</sup> transporting, cardiac muscle, slow twitch 2 NM\_017290  
 Q83SW7 (Q83SW7) Probable AraC-family transcriptional regulatory protein, partial (5%) [TC483539]  
 Rattus norvegicus similar to cyclin-dependent kinase 2-interacting protein (LOC299:XM\_216794  
 eukaryotic initiation factor 5 (eIF-5) NM\_020075  
 ESTs, Highly similar to S71820 JUN-activation-domain-binding protein 1 [H.sapiens BF554683  
 ESTs BE111756  
 Rattus norvegicus similar to aldo-keto reductase family 1, member B8 (LOC366639 XM\_345680  
 Rattus norvegicus similar to RIKEN cDNA 2310057H16 (LOC307351), mRNA [XM\_XM\_225867  
 Rattus norvegicus ras homolog gene family, member E (Arhe), mRNA [NM\_001007NM\_001007641  
 farnesyl diphosphate farnesyl transferase 1 NM\_019238  
 Unknown  
 Rattus norvegicus similar to Protein C20orf129 homolog (LOC311598), mRNA [XM\_XM\_230807  
 Rattus norvegicus similar to hypothetical protein D11Erd672e; putative 42-9-9 prot: XM\_213382  
 ESTs, Weakly similar to KIP1\_RAT DNA-PKCS INTERACTING PROTEIN (KINASE BI296950  
 Rattus norvegicus similar to histidyl-tRNA synthetase (LOC307492), mRNA [XM\_22 XM\_226008  
 Solute carrier 16 (monocarboxylic acid transporter), member 1 NM\_012716  
 myeloid cell leukemia sequence 1 NM\_021846  
 Inositol (myo)-1(or 4)-monophosphatase 1 NM\_032057  
 O78847 (O78847) NADH dehydrogenase subunit 2 (Fragment), partial (12%) [TC499468]  
 Unknown  
 ESTs AW142836  
 Rattus norvegicus peptidylprolyl cis-trans isomerase-like protein 3 (Cyp10l), mRNA. NM\_175707  
 ESTs BF398504  
 Rattus sp. mRNA for cyclin E, partial cds. D63164  
 Rattus norvegicus similar to Cytosolic nonspecific dipeptidase (Glutamate carboxyp XM\_214525  
 Unknown  
 similar to KIAA0152 gene product 12653207  
 ESTs, Moderately similar to A54854 Ras GTPase activating protein-related protein AA925885  
 Rattus norvegicus similar to ATP-binding cassette, sub-family A, member 12 isoform XM\_237242  
 Rattus norvegicus citrate synthase (Cs), mRNA. NM\_130755  
 ESTs BF412644  
 Rattus norvegicus signal peptidase 21kDa subunit (Spc21), mRNA [NM\_153628] NM\_153628  
 Rattus norvegicus ATPase, H<sup>+</sup> transporting, lysosomal (vacuolar proton pump), beta NM\_057213  
 dynein, cytoplasmic, light chain 1 NM\_053319  
 ESTs, Highly similar to S44903 ZK652.3 protein - Caenorhabditis elegans [C.elegans AW141137  
 Unknown  
 Q8VDX8 (Q8VDX8) Histidyl tRNA synthetase, partial (12%) [TC481392]  
 Rattus norvegicus cDNA clone MGC:94421 IMAGE:7134366, complete cds. [BC07:BC079290  
 Rattus norvegicus osteoclast stimulating factor 1 (Ostf1), mRNA [NM\_148892] NM\_148892  
 Rattus norvegicus similar to hypothetical protein MGC35138 (LOC309108), mRNA | XM\_219480  
 Rattus norvegicus similar to RIKEN cDNA 1810029B16 (LOC290686), mRNA [XM\_XM\_214332  
 ESTs AW141130  
 Rattus norvegicus similar to Isoleucyl-tRNA synthetase, cytoplasmic (Isoleucine--tR XM\_225196  
 Lysophospholipase NM\_013006  
 TPA: Rattus norvegicus mRNA for proteasome subunit alpha type 3-like (psma3l ge BN000326  
 Rattus norvegicus similar to expressed sequence AI838661 (LOC362614), mRNA [ XM\_342932  
 Rattus norvegicus similar to protein translocation complex beta; protein transport pr XM\_216400  
 Rattus norvegicus similar to RIKEN cDNA 1110018O08 (MGC94226), mRNA [NM\_ NM\_001007615

Rattus norvegicus similar to hypothetical protein FLJ22626 (LOC298342), mRNA [X XM\_216468  
 Rattus norvegicus similar to DREV protein (LOC300672), mRNA [XM\_217134] XM\_217134  
 Unknown  
 nuclear RNA helicase, DECD variant of DEAD box family NM\_053563  
 Rattus norvegicus similar to N-terminal asparagine amidohydrolase (LOC360462), r XM\_340738  
 Rattus norvegicus similar to desmocollin Desc1a precursor (LOC291759), mRNA [X XM\_226119  
 CDC37 (cell division cycle 37, *S. cerevisiae*, homolog) NM\_053743  
 Unknown  
 intermediate conductance calcium-activated potassium channel NM\_023021  
 Rattus norvegicus cyclin A2 (*Ccna2*), mRNA [XM\_342229] XM\_342229  
 Nucleoprotein 50 NM\_012991  
 MMU59509 mlrq-like protein (*Mus musculus*;), partial (21%) [TC463415]  
 Rattus norvegicus chromosome 3, 19 clones, strain BN/SsNHsdMCW RNOR03272 AABR03024169  
 Nopp140 associated protein NM\_021754  
 Rattus norvegicus signal sequence receptor, alpha (*Ssr1*), mRNA [NM\_001008891] NM\_001008891  
 Rattus norvegicus cDNA clone MGC:72393 IMAGE:5599462, complete cds [BC061 BC061992  
 heat shock 70kD protein 8 Y00054  
 Ras-related GTP-binding protein ragA NM\_053973  
 similar to Translation of nuc:AK006479\_1 *Mus musculus* adult male testis cDNA, RI BQ780873  
 Rattus norvegicus eukaryotic translation initiation factor 4A, isoform 1 (*Eif4a1*), mRNA NM\_199372  
 ESTs, Weakly similar to KIAA0701 protein [*H.sapiens*] X94509  
 Rattus norvegicus similar to karyopherin (importin) alpha 2 (LOC317233), mRNA [X XM\_228535  
 Rattus norvegicus similar to ornithine decarboxylase (EC 4.1.1.17) (LOC292749), r XM\_218383  
 ESTs, Highly similar to NAD-DEPENDENT METHYLENETETRAHYDROFOLATE [AW141791  
 sorting nexin 16 NM\_022289  
 Rattus norvegicus similar to actin (LOC290691), mRNA [XM\_224777] XM\_224777  
 Rattus norvegicus similar to Putative methyltransferase HUSSY-3 (Williams-Beuren XM\_347254  
 Unknown  
 Rattus norvegicus similar to secreted Ly6/uPAR related protein 2 (LOC315074), mFXM\_235419  
 GCGNUC:AF367448.1; Rattus norvegicus cyclin A2 mRNA, partial cds. AF367448.1  
 ESTs, Moderately similar to ADIPOSE DIFFERENTIATION-RELATED PROTEIN [AA874941  
 ESTs, Moderately similar to I37356 epithelial microtubule-associated protein, 115K BF563299  
 Rattus norvegicus similar to karyopherin (importin) alpha 2 (LOC289436), mRNA [X XM\_213990  
 Unknown  
 Rattus norvegicus eukaryotic translation initiation factor 4A, isoform 1 (*Eif4a1*), mRNA NM\_199372  
 Rattus norvegicus abhydrolase domain containing 6 (*Abhd6*), mRNA [NM\_0010076 NM\_001007680  
 similar to Protein:NP\_032562 membrane component, surface marker 1; L6 antigen; BU759691  
 Unknown  
 Rattus norvegicus cyclin-dependent kinase inhibitor 1A (*Cdkn1a*), mRNA [NM\_0807 NM\_080782  
 Rattus norvegicus cDNA clone MGC:94208 IMAGE:7130270, complete cds. [BC08: BC083582  
 EST BF394425  
 Unknown  
 Rattus norvegicus RS21-C6 protein (*Rs21c6*), mRNA [NM\_138892] NM\_138892  
 Rattus norvegicus calcium regulated heat stable protein 1 (*Carhsp1*), mRNA [NM\_1 NM\_152790  
 Unknown  
 Rattus norvegicus similar to RIKEN cDNA 1110056N09 (LOC308890), mRNA [XM\_ XM\_218993  
 Enolase 1, alpha NM\_012554  
 Rattus norvegicus cDNA clone IMAGE:7110106. [BC078951] BC078951  
 Q8I738 (Q8I738) TcC31.4, partial (6%) [TC487987]  
 UI-R-EP0-cnv-m-06-0-UI.s1 UI-R-EP0 Rattus norvegicus cDNA clone UI-R-EP0-cnv BQ204924  
 Rattus norvegicus cathepsin D (*Ctsd*), mRNA. NM\_134334

|                                                                                       |              |
|---------------------------------------------------------------------------------------|--------------|
| Protein phosphatase 2 (formerly 2A), catalytic subunit, alpha isoform                 | NM_017039    |
| Unknown                                                                               |              |
| Rattus norvegicus dynein light intermediate chain 1 mRNA, complete cds                | AW142507     |
| ESTs                                                                                  | AW918599     |
| Rattus norvegicus signal recognition particle 54 kDa (Srp54), mRNA [XM_343063]        | XM_343063    |
| ESTs, Weakly similar to T15334 hypothetical protein B0336.8 - Caenorhabditis eleg     | BF563278     |
| alpha actinin 4                                                                       | AA944358     |
| Rattus norvegicus similar to T-complex associated-testis-expressed 1-like (Protein 1) | XM_343769    |
| ESTs                                                                                  | AW528001     |
| ESTs, Weakly similar to JC1285 protein-tyrosine-phosphatase [R.norvegicus]            | BF551144     |
| Q8LCS5 (Q8LCS5) U6 snRNA-associated Sm-like protein, partial (44%) [TC503599]         |              |
| ESTs                                                                                  | BF289360     |
| Rattus norvegicus similar to RIKEN cDNA 1110008F13 (LOC366487), mRNA [XM_345593]      | XM_345593    |
| Rattus norvegicus similar to CAD protein (LOC362709), mRNA [XM_343027]                | XM_343027    |
| ESTs                                                                                  | AI599077     |
| Rattus norvegicus similar to c-myc binding protein (LOC298513), mRNA [XM_2165]        | XM_216518    |
| Unknown                                                                               |              |
| eukaryotic initiation factor 5 (eIF-5)                                                | NM_020075    |
| unknown function                                                                      | CA506204     |
| unknown function                                                                      | CB606439     |
| Rattus norvegicus similar to junctophilin 3; junctophilin type 3 (LOC307916), mRNA    | XM_226549    |
| Rattus norvegicus similar to serine/threonine kinase 18, isoform sak-a (LOC310344)    | XM_227064    |
| ESTs                                                                                  | BF289772     |
| Unknown                                                                               |              |
| Rattus norvegicus similar to proliferating cell nuclear antigen (LOC299084), mRNA     | XM_234211    |
| Rattus norvegicus similar to heat shock protein 105 kDa alpha (LOC288444), mRNA       | XM_213699    |
| Rattus norvegicus similar to hypothetical protein FLJ14813 (LOC307169), mRNA [X       | XM_225629    |
| Proliferating cell nuclear antigen                                                    | NM_022381    |
| Rattus norvegicus similar to chromosome 14 open reading frame 21 (LOC290235),         | XM_214175    |
| calcium binding protein A6 (calcyclin)                                                | NM_053485    |
| Rattus norvegicus similar to nuclear orphan receptor/transcription factor (LOC3008)   | XM_217192    |
| Rattus norvegicus similar to bA16L21.2.1 (novel DnaJ domain protein similar to Dro    | XM_342844    |
| Rattus norvegicus LOC363070 (LOC363070), mRNA [XM_343398]                             | XM_343398    |
| Rattus norvegicus similar to Txndc1 protein (LOC362751), mRNA [XM_343076]             | XM_343076    |
| ESTs, Highly similar to SZ14 MOUSE SMALL INDUCIBLE CYTOKINE B14 PRECL                 | AI043862     |
| Rattus norvegicus similar to Histone H2B 291B (LOC291157), mRNA [XM_214483]           | XM_214483    |
| ESTs, Moderately similar to CALX RAT CALNEXIN PRECURSOR [R.norvegicus]                | AW920965     |
| similar to Protein:NP_079785 RIKEN cDNA 2310008M10 gene [Mus musculus]. sc            | BQ191086     |
| ESTs                                                                                  | AI103474     |
| Unknown                                                                               |              |
| Rattus norvegicus similar to SEC61, gamma subunit (LOC367253), mRNA [XM_34            | XM_346040    |
| ESTs                                                                                  | AW915254     |
| ESTs                                                                                  | AW915265     |
| ESTs, Weakly similar to T34057 hypothetical protein F28B3.5 - Caenorhabditis eleg     | AA956595     |
| ESTs, Weakly similar to T23985 hypothetical protein R06F6.5b - Caenorhabditis eleg    | AA963457     |
| Rattus norvegicus similar to RIKEN cDNA 6330409N04 (MGC95134), mRNA [NM_1             | NM_001009635 |
| proteasome (prosome, macropain) subunit, alpha type 3                                 | NM_017280    |
| Rattus norvegicus putative 28 kDa protein (LOC289809), mRNA [NM_199083]               | NM_199083    |
| Unknown                                                                               |              |
| Rattus norvegicus similar to cytoskeleton associated protein 2; tumor-associated mi   | XM_224970    |
| ESTs                                                                                  | AA925469     |

CA338808 NISC\_lx07d11.y1 NCI\_CGAP\_Pr51 Rattus norvegicus cDNA clone IMA CA338808  
 Rattus norvegicus chromosome 1, 106 clones, strain BN/SsNHsdMCW RNOR0320 AABR03000060  
 interferon-related developmental regulator 1 NM\_019242  
 Rattus norvegicus DR-NR#1 mRNA for Down-regulated in nephrectomized rat kidney AB108669  
 Rattus norvegicus similar to translation initiation factor eIF-2 beta chain - rabbit (LOC292143) XM\_345000  
 Unknown  
 Rattus norvegicus similar to phospholipid scramblase 3 (LOC360549), mRNA [XM\_340827  
 UI-R-FJ0-cpv-l-01-0-UI.r1 UI-R-FJ0 Rattus norvegicus cDNA clone UI-R-FJ0-cpv-l-01-0-UI CA510958  
 Rattus norvegicus similar to RIKEN cDNA 1700001E04 (LOC363317), mRNA [XM\_343657  
 protein tyrosine phosphatase 4a1 NM\_031579  
 eukaryotic translation initiation factor 2, subunit 1 (alpha) NM\_019356  
 Protein-L-isoaspartate (D-aspartate) O-methyltransferase NM\_013073  
 protein phosphatase 2 (formerly 2A), regulatory subunit B (PR 52), alpha isoform NM\_053999  
 Rattus norvegicus similar to gamma actin-like protein (LOC289155), mRNA [XM\_213911  
 Rattus norvegicus similar to hypothetical protein AL133206 (LOC298500), mRNA [XM\_216529  
 Unknown  
 Rattus norvegicus similar to CG15118-PB (LOC361699), mRNA [XM\_341982] XM\_341982  
 ESTs, Weakly similar to T16414 hypothetical protein F48E8.2 - Caenorhabditis elegans AW527204  
 Rattus norvegicus similar to Heat shock cognate 71 kDa protein (LOC294046), mRNA [XM\_215267  
 Rattus norvegicus similar to A230072116Rik protein (LOC364598), mRNA [XM\_344522  
 Rattus norvegicus similar to transmembrane 4 superfamily member 6 (LOC302313) XM\_217563  
 Rattus norvegicus similar to Heat shock cognate 71 kDa protein (LOC307023), mRNA [XM\_225443  
 Unknown  
 cysteine knot superfamily 1, BMP antagonist 1 NM\_019282  
 Rattus norvegicus similar to RNA binding motif, single stranded interacting protein 1 XM\_342438  
 ESTs AW915744  
 thioredoxin-like 2 NM\_032614  
 T-cell death associated gene NM\_017180  
 Rattus norvegicus similar to vacuolar protein sorting 26; vacuole protein sorting 26; NM\_001007740  
 Rattus norvegicus similar to DEAD/H (Asp-Glu-Ala-Asp/His) box polypeptide 11; DE XM\_346084  
 Rattus sp. 3 UTR. CA509950  
 Rattus norvegicus similar to small nuclear RNA activating complex, polypeptide 3, 5 XM\_342855  
 TGFB inducible early growth response NM\_031135  
 Rattus norvegicus cyclin B1 (Ccnb1), mRNA [NM\_171991] NM\_171991  
 Rattus norvegicus similar to 60 kDa heat shock protein, mitochondrial precursor (Hsp60) XM\_228167  
 Rattus norvegicus similar to Heat shock cognate 71 kDa protein (LOC291461), mRNA [XM\_212821  
 metastasis-associated GPI-anchored protein NM\_021759  
 Rattus norvegicus F-box only protein 11 (Fbxo11), mRNA [NM\_181631] NM\_181631  
 ESTs, Weakly similar to T21349 hypothetical protein F25H2.8 - Caenorhabditis elegans H32128  
 Rattus norvegicus similar to nuclear cap binding protein subunit 2; nuclear cap binding protein 2 XM\_213591  
 Liver activating protein (LAP, also NF-IL6, nuclear factor-IL6, previously designated as NF-IL6) NM\_024125  
 Rattus norvegicus cytokeratin 21 (Krt21), mRNA [NM\_173128] NM\_173128  
 solute carrier family 30 (zinc transporter), member 1 NM\_022853  
 Rattus norvegicus similar to RIKEN cDNA 2310056K19 (LOC287738), mRNA [XM\_213488  
 Endothelin 1 NM\_012548  
 Rattus norvegicus similar to RIKEN cDNA 2310057H16 (LOC307351), mRNA [XM\_225867  
 dual specificity phosphatase 6 NM\_053883  
 Rattus norvegicus similar to adaptor-related protein complex 3, sigma 1 subunit; adaptor-related protein complex 3, sigma 1 subunit XM\_217560  
 Rattus norvegicus similar to D7H11orf15 protein (LOC293415), mRNA [XM\_215038] XM\_215038  
 flag structure-specific endonuclease NM\_053430  
 ESTs, Highly similar to IF2B\_HUMAN EUKARYOTIC TRANSLATION INITIATION FACTOR 2B (FAA901338)

ESTs, Highly similar to A Chain A, The Crystal Structure Of Human Eukaryotic Rele AI180170  
Rattus norvegicus similar to IGF-II mRNA-binding protein 2 (LOC303824), mRNA [J XM\_221343  
unknown function BQ210920  
Unknown  
Rattus norvegicus similar to hypothetical protein BC015148 (LOC301381), mRNA [J XM\_217391  
Rattus norvegicus similar to Max dimerization protein 4 (LOC360961), mRNA [XM\_:XM\_341241  
ESTs BE120644  
Rattus norvegicus similar to Ubiquitin carboxyl-terminal hydrolase isozyme L5 (UCF XM\_341130  
Unknown  
ESTs, Highly similar to orotidine-5'-phosphate decarboxylase [M.musculus] AA944506  
Rattus norvegicus similar to myosin regulatory light chain-like (LOC316125), mRNA XM\_236776  
Thyroglobulin NM\_030988  
Unknown  
Rattus norvegicus similar to p20-CGGBP (LOC288353), mRNA [XM\_213679] XM\_213679  
ESTs, Highly similar to SC13\_HUMAN SEC13-RELATED PROTEIN [H.sapiens] AA818945  
Rattus norvegicus similar to FLJ23471 protein (LOC288515), mRNA [XM\_221956] XM\_221956  
nucleoside diphosphate kinase NM\_031833  
Unknown  
ESTs, Weakly similar to SX10 RAT TRANSCRIPTION FACTOR SOX-10 [R.norveg AI599999  
Rattus norvegicus tetratricopeptide repeat domain 1 (Ttc1), mRNA [NM\_001005529] NM\_001005529  
heat shock 70kD protein 8 NM\_024351  
Rattus norvegicus similar to ELAV (embryonic lethal, abnormal vision, Drosophila)-l XM\_344063  
Rattus norvegicus similar to Tex27 protein (LOC361816), mRNA [XM\_342109] XM\_342109  
Rattus norvegicus similar to RIKEN cDNA 4921516M08 (LOC294694), mRNA [XM\_ XM\_215465  
Rattus norvegicus Bcl-2 binding component 3 (Bbc3), mRNA [NM\_173837] NM\_173837  
Rattus norvegicus similar to RIKEN cDNA 1700001E04 (LOC367428), mRNA [XM\_ XM\_346135  
Rattus norvegicus similar to Gamma-soluble NSF attachment protein (SNAP-gamm XM\_225881  
Rattus norvegicus similar to N-acetylneuraminic acid synthase (sialic acid synthase, XM\_234991  
Rattus norvegicus similar to T54 protein (LOC302560), mRNA [XM\_217600] XM\_217600  
presenilin 1 NM\_019163  
a disintegrin and metalloproteinase with thrombospondin motifs 1 (ADAMTS-1) NM\_024400  
Phosphoglycerate mutase 1 NM\_053290  
Rattus norvegicus similar to CDV-3B (LOC315970), mRNA [XM\_236579] XM\_236579  
Inhibitor of DNA binding 3, dominant negative helix-loop-helix protein NM\_013058  
B-cell translocation gene 3 NM\_019290  
Unknown  
Rattus norvegicus similar to interferon regulatory factor 7 (LOC293624), mRNA [XM XM\_215121  
ESTs AW915837  
Rattus norvegicus similar to aldo-keto reductase family 1, member B8 (LOC294101 XM\_220074  
Rattus norvegicus similar to hypothetical protein FLJ13448 (MGC109115), mRNA [I NM\_001009671  
ESTs BF565662  
ESTs, Highly similar to orotidine-5'-phosphate decarboxylase [M.musculus] AW916035  
Unknown  
Unknown  
Unknown  
Rattus norvegicus similar to 2600016B03Rik protein (LOC306526), mRNA [XM\_224 XM\_224930  
Rattus norvegicus similar to stromal antigen 2 (LOC313304), mRNA [XM\_233108] XM\_233108  
ESTs AI060241  
Rattus norvegicus similar to LIV-1 protein, estrogen regulated (LOC291733), mRNA XM\_214607  
Rattus norvegicus similar to cytoplasmic beta-actin (LOC302827), mRNA [XM\_229 XM\_229147  
V-1 protein NM\_024374

reticulocalbin 2 NM\_017132  
Rattus norvegicus similar to transmembrane protease, serine 4 (LOC367074), mRNA XM\_345932  
Rattus norvegicus similar to RIKEN cDNA 9930118K05 (MGC95031), mRNA [NM\_(NM\_001007699  
ESTs BF548575  
Rattus norvegicus similar to RIKEN cDNA 2510010F15 (LOC367293), mRNA [XM\_XM\_346060  
Rattus norvegicus similar to GLANDULAR KALLIKREIN 8, PROSTATIC PRECURS XM\_214932  
Rattus norvegicus similar to Alpha enolase (2-phospho-D-glycerate hydro-lyase) (N XM\_223275  
Rattus norvegicus proteasome 26S non-ATPase subunit 12 (Psm12), mRNA [NM\_NM\_001005875  
Rattus norvegicus similar to glyceraldehyde-3-phosphate dehydrogenase (phospho XM\_226873  
Unknown  
activating transcription factor ATF-4 NM\_024403  
Unknown  
Rattus norvegicus SERTA domain containing 1 (Sertad1), mRNA [NM\_001007735] NM\_001007735  
Rattus norvegicus similar to PROHIBITIN (B-CELL RECEPTOR ASSOCIATED PR(XM\_228492  
Unknown  
ESTs AA957332  
Follistatin NM\_012561  
ESTs, Weakly similar to S46930 teg292 protein - mouse [M.musculus] AW921544  
ESTs AA850031  
UI-R-DY0-ckr-I-08-0-UI.s1 UI-R-DY0 Rattus norvegicus cDNA clone UI-R-DY0-ckr-I BM384331  
Rattus norvegicus similar to arginine-rich, mutated in early stage tumors; EST D179 XM\_236614  
ESTs, Highly similar to ETV4 MOUSE POLYOMAVIRUS ENHANCER ACTIVATOR BF545627  
Rattus norvegicus clone D920 intestinal epithelium proliferating cell-associated mRI U21719.1  
ras-related protein NM\_031090  
ESTs AI101338  
Rattus norvegicus actin-related protein 2 (Actr2), mRNA [NM\_001009268] NM\_001009268  
Rattus norvegicus similar to N-terminal acetyltransferase 1 (LOC310399), mRNA [XIXM\_241375  
Unknown  
Unknown  
Rattus norvegicus similar to glyceraldehyde-3-phosphate dehydrogenase (LOC288: XM\_222467  
Protein kinase, interferon-inducible double stranded RNA dependent NM\_019335  
Rattus norvegicus similar to polynucleotide phosphorylase-like protein (LOC360992 XM\_341266  
Protein kinase, cAMP dependent, regulatory, type 1 NM\_013181  
similar to GMP synthetase BQ204943  
Distal-less homeobox NM\_012943  
Rattus norvegicus chloride intracellular channel 1 (Clic1), mRNA [NM\_001002807] NM\_001002807  
ESTs BE106220  
Q91VN7 (Q91VN7) Max dimerization protein 4, complete [TC468818]  
Rattus norvegicus ubiquitin specific protease 15 (Usp15), mRNA [NM\_145184] NM\_145184  
BQ208148 UI-R-EP0-coa-f-19-0-UI.s1 UI-R-EP0 Rattus norvegicus cDNA clone UI- BQ208148  
Rattus norvegicus similar to Ki antigen (LOC287716), mRNA [XM\_213461] XM\_213461  
Rattus norvegicus similar to RIKEN cDNA 2410004J23 (LOC287768), mRNA [XM\_XM\_213506  
EST, Moderately similar to T12524 hypothetical protein DKFZp434L013.1 [H.sapie BE116198  
Rattus norvegicus similar to ARP2/3 complex 21 kDa subunit (P21-ARC) (Actin-rela XM\_213782  
ESTs BI294824  
Rattus norvegicus similar to RIKEN cDNA B230114J08 (LOC360698), mRNA [XM\_XM\_340968  
unknown function BQ204181  
Rattus norvegicus similar to hypothetical protein D5Ertd33e (LOC304542), mRNA [XM\_222227  
Rattus norvegicus similar to cytoplasmic beta-actin (LOC298169), mRNA [XM\_2331 XM\_233107  
A36949 28.9K basic DNA-binding protein - Mycobacterium scrofulaceum plasmid pMSC262  
Rattus norvegicus LOC361792 (LOC361792), mRNA [XM\_347002] XM\_347002

Rattus norvegicus similar to Heat shock cognate 71 kDa protein (LOC310385), mRNA [XM\_227125  
 ESTs, Moderately similar to T46465 hypothetical protein DKFZp434A0530.1 [H.sap AW915543  
 Cell division cycle control protein 2 NM\_019296  
 ESTs, Highly similar to SKD1 MOUSE SKD1 PROTEIN [M.musculus] BF394175  
 Rattus norvegicus ATPase, H<sup>+</sup> transporting, lysosomal 34kDa, V1 subunit D (Atp6v NM\_199386  
 translocase of inner mitochondrial membrane 8 (yeast) homolog A NM\_053370  
 Unknown  
 Rattus norvegicus similar to Histone H2B 291B (LOC364720), mRNA [XM\_344597] XM\_344597  
 DnaJ-like protein BG668811  
 Rattus norvegicus cDNA clone MGC:94093 IMAGE:7125106, complete cds. [BC08 BC081964  
 Rattus norvegicus similar to cDNA sequence BC025474 (LOC361866), mRNA [XM\_XM\_342160  
 Rattus norvegicus proteasome (prosome, macropain) 26S subunit, non-ATPase, 9 (NM\_130430  
 G protein gamma-5 subunit NM\_024377  
 ESTs BF281925  
 transforming growth factor-beta (TGF-beta) masking protein large subunit NM\_021587  
 MIPP65 protein NM\_022607  
 inhibitor of apoptosis protein 1 NM\_023987  
 Rattus norvegicus similar to Nucleoside diphosphate kinase B (NDK B) (NDP kinase) XM\_345974  
 ESTs AI230806  
 Rattus norvegicus histone acetyltransferase 1 (Hat1), mRNA [NM\_001009657] NM\_001009657  
 Rattus norvegicus similar to CDV-3B (LOC315970), mRNA [XM\_236579] XM\_236579  
 Glyceraldehyde-3-phosphate dehydrogenase NM\_017008  
 Rattus norvegicus TAF9 RNA polymerase II, TATA box binding protein (TBP)-associated NM\_184048  
 Rattus norvegicus expressed in non-metastatic cells 1 (Nme1), mRNA [NM\_138548] NM\_138548  
 protein kinase inhibitor p58 NM\_022232  
 Rattus norvegicus similar to Cc2-17 (LOC362292), mRNA [XM\_342606] XM\_342606  
 ESTs, Weakly similar to T26638 hypothetical protein Y37D8A.2 - Caenorhabditis elegans BI285791  
 ESTs AI501238  
 ESTs AW144410  
 Unknown  
 Rattus norvegicus similar to Ly1 antibody reactive clone (LOC289707), mRNA [XM\_XM\_214063  
 myosin regulatory light chain NM\_017343  
 Low molecular mass polypeptide 2 NM\_012708  
 Rattus norvegicus similar to RIKEN cDNA 3230401O13 (LOC293484), mRNA [XM\_XM\_215080  
 Rattus norvegicus similar to NADH dehydrogenase (ubiquinone) 1 alpha subcomplex XM\_215814  
 Rattus norvegicus similar to DnaJ (Hsp40) homolog, subfamily D, member 1 (LOC2 XM\_214238  
 ESTs BF544951  
 Rattus norvegicus similar to A230072I16Rik protein (LOC287593), mRNA [XM\_213 XM\_213411  
 Rattus norvegicus thioredoxin-like (32kD) (Txn1), mRNA [NM\_080887] NM\_080887  
 immediate early gene transcription factor NGFI-B NM\_024388  
 ESTs AW918264  
 Rattus norvegicus olfactory receptor gene Oir1452 (Oir1452), mRNA [NM\_0010007 NM\_001000773  
 Thrombin receptor NM\_012950  
 isocitrate dehydrogenase 3 (NAD<sup>+</sup>) alpha NM\_053638  
 Unknown  
 Rattus norvegicus similar to citrate synthase; citrate synthase precursor (LOC29975 XM\_235086  
 Rattus norvegicus similar to HN1-like protein (LOC360492), mRNA [XM\_340766] XM\_340766  
 Rattus norvegicus similar to Histone H2B 291B (LOC295278), mRNA [XM\_227463] XM\_227463  
 Rattus norvegicus similar to hypothetical protein FLJ21103 (LOC315549), mRNA [X XM\_235990  
 kinase interacting with leukemia-associated gene (stathmin) NM\_017293  
 mitogen activated protein kinase 1 NM\_053842



Tumor-associated glycoprotein pE4 NM\_017076  
 Rattus norvegicus similar to centromere protein A (LOC298850), mRNA [XM\_216657 XM\_216657  
 mitogen activated protein kinase 1 NM\_053842  
 Rattus norvegicus similar to RIKEN cDNA 1110056N09 (LOC302804), mRNA [XM\_229122  
 ESTs BI297410  
 Rattus norvegicus olfactomedin 3 (Olfm3), mRNA. NM\_145777  
 Rattus norvegicus similar to tRNA exportin; EXPORTIN-T (LOC314879), mRNA [XM\_235185  
 Rattus norvegicus guanylate binding protein 2, interferon-inducible (Gbp2), mRNA [ NM\_133624  
 Rat mRNA for dihydroorotase, partial cds. BM391890  
 ESTs AA899565  
 Rattus norvegicus similar to Hbs1l protein (LOC293408), mRNA [XM\_215034] XM\_215034  
 ESTs BE115624  
 Rattus norvegicus similar to hypothetical protein FLJ37953 (LOC301419), mRNA [XM\_217397  
 Q31236 (Q31236) MHC class I T7 antigen (Fragment), partial (35%) [TC482933]  
 ESTs AI112947  
 Rattus norvegicus wingless-type MMTV integration site 7A (Wnt7a), mRNA [XM\_342723  
 Unknown  
 Rattus norvegicus similar to RIKEN cDNA 4930586I02 (LOC314405), mRNA [XM\_234481  
 similar to Protein:NP\_065090 PEST-containing nuclear protein [Homo sapiens]. scc CB545224  
 phospholamban NM\_022707  
 Rattus norvegicus similar to peptidylprolyl isomerase D (cyclophilin D) (LOC289172 XM\_222829  
 ESTs, Highly similar to T00079 hypothetical protein KIAA0465 [H.sapiens] AA858740  
 Rattus norvegicus BCL2-related protein A1 (Bcl2a1), mRNA [NM\_133416] NM\_133416  
 ESTs AW141388  
 Rattus norvegicus similar to Protein translation factor SUI1 homolog (LOC361563), XM\_341846  
 Q7TQ12 (Q7TQ12) Aa1114, partial (10%) [TC462241]  
 ESTs BI289678  
 similar to Protein:NP\_082157 oxysterol-binding protein-like protein 3; oxysterol-bind CB605887  
 Rattus norvegicus ATPase, H<sup>+</sup> transporting, lysosomal (vacuolar proton pump), bet NM\_057213  
 ESTs AI556941  
 Rattus norvegicus 25 oligoadenylate synthetase (Oas1), mRNA. NM\_138913  
 Rattus norvegicus similar to Nucleoside diphosphate kinase B (NDK B) (NDP kinase XM\_344449  
 Rattus norvegicus similar to peroxiredoxin 1 (LOC299251), mRNA [XM\_213073] XM\_213073  
 PRKC, apoptosis, WT1, regulator NM\_033485  
 Rattus norvegicus similar to heterogeneous nuclear ribonucleoprotein A2/B1 (LOC3230540  
 DNA-damage-inducible transcript 1 NM\_024127  
 Rattus norvegicus similar to Eukaryotic translation initiation factor 3 subunit 1 (eIF-3 XM\_230523  
 Rattus norvegicus similar to Alpha enolase (2-phospho-D-glycerate hydro-lyase) (N XM\_214456  
 Rattus norvegicus similar to glyceraldehyde-3-phosphate dehydrogenase (phospho XM\_234091  
 AW915416 EST346720 Normalized rat embryo, Bento Soares Rattus sp. cDNA clone BC086430  
 Transforming growth factor beta stimulated clone 22 AW143698  
 Rattus norvegicus similar to RIKEN cDNA 1110008F13 (LOC296315), mRNA [XM\_215904  
 proteasome (prosome, macropain) subunit, alpha type 6 NM\_017283  
 Rattus norvegicus similar to nicotinic acetylcholine receptor-associated 46K protein XM\_215773  
 Rattus norvegicus similar to Eukaryotic translation initiation factor 4 gamma 2 (eIF-4 XM\_223854  
 Rattus norvegicus similar to RIKEN cDNA 2310034L21 (LOC296290), mRNA [XM\_215892  
 ESTs BF548328  
 Rattus norvegicus osteoclast stimulating factor 1 (Ostf1), mRNA. NM\_148892  
 Unknown  
 Rattus norvegicus cyclin B1 (Ccnb1), mRNA [NM\_171991] NM\_171991  
 Rattus norvegicus similar to 2810407K09Rik protein (LOC293511), mRNA [XM\_215090

Tyrosine 3-monooxygenase/tryptophan 5-monooxygenase activation protein, eta pc NM\_013052  
 ESTs, Weakly similar to T21079 hypothetical protein F17H10.1 - Caenorhabditis ele BF563417  
 ESTs AA996838  
 Rattus norvegicus similar to transgelin 2; SM22-alpha homolog (LOC304983), mRNA XM\_222906  
 R.norvegicus mRNA for hypoxanthine-guanine phosphoribosyltransferase. BQ203725  
 ESTs, Highly similar to UBIQUITIN-CONJUGATING ENZYME E2-17 KD [R.norvegi BE111651  
 Calmodulin 1 (phosphorylase kinase, delta) NM\_031969  
 Rattus norvegicus similar to hypothetical protein FLJ38482 (LOC361137), mRNA [X XM\_341423  
 Rattus norvegicus similar to vesicle trafficking protein sec22b (LOC310710), mRNA XM\_227499  
 Rattus norvegicus microtubule-associated protein, RP/EB family, member 1 (Mapre NM\_138509  
 Rattus norvegicus similar to Proteasome subunit alpha type 6 (Proteasome iota cha XM\_212707  
 Rattus norvegicus similar to Chain A, T13s Mutant Of Bovine 70 Kilodalton Heat Sh XM\_224824  
 Rattus norvegicus hypoxanthine guanine phosphoribosyl transferase (Hprt), mRNA NM\_012583  
 ESTs AI511259  
 Rattus norvegicus similar to NUF2R protein (LOC304951), mRNA [XM\_222860] XM\_222860  
 Rattus norvegicus similar to osteoclast stimulating factor 1 (LOC289198), mRNA [X XM\_212730  
 Rattus norvegicus similar to Hspca protein (LOC315370), mRNA [XM\_235741] XM\_235741  
 Rattus norvegicus similar to MHR23B (LOC298012), mRNA [XM\_216381] XM\_216381  
 platelet-activating factor acetylhydrolase alpha 2 subunit (PAF-AH alpha 2) NM\_022387  
 DnaJ (Hsp40) homolog, subfamily A, member 2 NM\_032079  
 Fos-like antigen 1 NM\_012953  
 Rattus norvegicus diacylglycerol O-acyltransferase 1 (Dgat1), mRNA [NM\_053437] NM\_053437  
 Rattus norvegicus similar to RIKEN cDNA 2500002L14; EST C77350 (MGC94464), NM\_001007647  
 Rattus norvegicus similar to GAS2-related protein isoform beta (LOC360973), mRNA XM\_341251  
 Rattus norvegicus archain (Arcn1), mRNA [NM\_001007662] NM\_001007662  
 Rattus norvegicus similar to glyceraldehyde-3-phosphate dehydrogenase (LOC307; XM\_225724  
 Unknown  
 Rattus norvegicus myeloid differentiation primary response gene 116 (Myd116), mF NM\_133546  
 Rattus norvegicus similar to ubiquitin-conjugating enzyme E2C; DNA segment, Chr XM\_215924  
 similar to mouse RIKEN cDNA 2610528M18Rik gene, clone MGC:27944 IMAGE:3f BQ201720  
 ESTs, Weakly similar to CGB2 MOUSE G2/MITOTIC-SPECIFIC CYCLIN B2 [M.mu AI044806  
 ESTs, Moderately similar to TRI3\_HUMAN THYROID RECEPTOR INTERACTING AI144623  
 Unknown  
 Rattus norvegicus similar to Arginyl-tRNA synthetase (LOC287191), mRNA [XM\_21 XM\_213276  
 similar to Translation of nuc:BC024726\_1 Mus musculus, clone MGC:38936 IMAGE CB548133  
 Rattus norvegicus similar to CENTRIOLIN (LOC311886), mRNA [XM\_231168] XM\_231168  
 Rattus norvegicus similar to apoptosis signal-regulating kinase 2 (LOC313022), mR XM\_232732  
 ESTs, Weakly similar to DIA1\_HUMAN DIAPHANOUS PROTEIN HOMOLOG 1 [H. AW143515  
 unknown function BQ781225  
 Rattus norvegicus similar to glyceraldehyde-3-phosphate dehydrogenase (LOC314; XM\_234405  
 Rattus norvegicus similar to Nucleolar protein Nop56 (Nucleolar protein 5A) (LOC3f XM\_342517  
 ESTs AW142368  
 integrin-associated protein NM\_019195  
 Rattus norvegicus similar to Histone acetyltransferase type B catalytic subunit (LOC XM\_345647  
 ESTs BG671341  
 transcription elongation factor B (SIII) polypeptide 2 (18kD, elongin B) NM\_031129  
 Rattus norvegicus potassium channel regulator 1 (LOC245960), mRNA. NM\_139101  
 Rattus norvegicus phospholipase C, delta 4 (Plcd4), mRNA. NM\_080688  
 UBIQUITIN SPECIFIC PROTEASE 15. [Source:RefSeq;Acc:NM\_145184] [ENSRNOT00000031191]  
 Rattus norvegicus similar to KIAA0437 (LOC364903), mRNA [XM\_344704] XM\_344704  
 ESTs BF543360

calpactin I heavy chain NM\_019905  
 Testis enhanced gene transcript X75855  
 Unknown  
 Rattus norvegicus similar to Glycerdehyde 3-phosphate dehydrogenase (GAPDH) XM\_223471  
 ESTs, Weakly similar to MALATE OXIDOREDUCTASE [R.norvegicus] AI575071  
 Unknown  
 Rattus norvegicus OL-64 protein (Serpina12), mRNA [NM\_138825] NM\_138825  
 Rattus norvegicus similar to RIKEN cDNA 1300013G12 (LOC304766), mRNA [XM\_XM\_222627  
 Rattus norvegicus DEAD/H (Asp-Glu-Ala-Asp/His) box polypeptide 1 (Ddx1), mRNA XM\_343037  
 Rattus norvegicus MAP/microtubule affinity-regulating kinase 3 (Mark3), mRNA [NM\_NM\_130749  
 ESTs AW433572  
 Rattus norvegicus similar to Tceb2 protein (LOC290772), mRNA [XM\_224889] XM\_224889  
 Rattus norvegicus similar to SEC61, gamma subunit (LOC367253), mRNA [XM\_341 XM\_346040  
 Rattus norvegicus similar to ethanol induced 6 (LOC316643), mRNA [XM\_237424] XM\_237424  
 ESTs AI556201  
 Rattus norvegicus similar to adenomatosis polyposis coli down-regulated 1; hypothet XM\_225882  
 Rattus norvegicus TOM70 protein (TOM70), mRNA [NM\_212519] NM\_212519  
 timeless (Drosophila) homolog NM\_031340  
 cofilin 1, non-muscle NM\_017147  
 ESTs, Weakly similar to T23140 hypothetical protein H38K22.2b - Caenorhabditis e AI385364  
 Rattus norvegicus preconditioning-inducible gene 1 protein (PIG-1), mRNA. NM\_134394  
 UI-R-FJ0-cpv-l-01-0-UI.r1 UI-R-FJ0 Rattus norvegicus cDNA clone UI-R-FJ0-cpv-l-( CA510958  
 Glycerdehyde-3-phosphate dehydrogenase NM\_017008  
 Rattus norvegicus similar to Vrk1 protein (LOC362779), mRNA [XM\_343106] XM\_343106  
 ESTs, Weakly similar to T31434 densin-180 - rat [R.norvegicus] AW920702  
 Rattus norvegicus 1-acylglycerol-3-phosphate O-acyltransferase 1 (lysophosphatidi NM\_133406  
 Rattus norvegicus polyubiquitin (Loc192255), mRNA. NM\_138895  
 Rattus norvegicus similar to RIKEN cDNA 2210409E12 (LOC366634), mRNA [XM\_XM\_345678  
 Rattus norvegicus RT1 class II, locus Db1 (RT1-Db1), mRNA [NM\_001008884] NM\_001008884  
 vesicle-associated membrane protein, associated protein A (33 kDa) NM\_031631  
 ESTs, Weakly similar to S02003 neurofilament triplet H protein - rat [R.norvegicus] H31541  
 Rattus norvegicus similar to ALY (LOC287878), mRNA [XM\_213542] XM\_213542  
 Rattus norvegicus similar to hypothetical protein MGC36325 (LOC291736), mRNA | XM\_214609  
 Rattus norvegicus similar to serine hydroxymethyl transferase 1 (soluble) (LOC287 XM\_213324  
 Rattus norvegicus cyclin D1 (Ccnd1), mRNA [NM\_171992] NM\_171992  
 Rattus norvegicus similar to Nucleophosmin (NPM) (Nucleolar phosphoprotein B23) XM\_213108  
 proteasome (prosome, macropain) subunit, beta type, 2 NM\_017284  
 Rattus norvegicus similar to Yippee homolog (CGI-127) (LOC298792), mRNA [XM\_XM\_216641  
 ESTs, Weakly similar to S64253 probable membrane protein YGL231c - yeast (Sac AI228947  
 Rattus norvegicus transporter 1, ATP-binding cassette, sub-family B (MDR/TAP) (T: NM\_032055  
 Rattus norvegicus similar to nicotinamide N-methyltransferase (LOC300691), mRNA/ XM\_217138  
 Rattus norvegicus similar to H2B histone family, member T; histone family member XM\_225374  
 ESTs AA859497  
 ESTs, Highly similar to PFD4\_HUMAN PREFOLDIN SUBUNIT 4 (PROTEIN C-1) [F AW141147  
 Rattus norvegicus similar to heterogeneous nuclear ribonucleoprotein G - human (L XM\_226369  
 Unknown  
 Rattus norvegicus similar to cofactor required for Sp1 transcriptional activation, sub XM\_220335  
 Unknown  
 Rattus norvegicus similar to 60 kDa heat shock protein, mitochondrial precursor (Hs XM\_229115  
 Rattus norvegicus cDNA clone MGC:94020 IMAGE:7121584, complete cds. [BC08: BC081947  
 EST293323 Normalized rat embryo, Bento Soares Rattus sp. cDNA clone RGIBB9: AW143028

Rattus norvegicus similar to claudin-9 (LOC287099), mRNA [XM\_220203] XM\_220203  
 Rattus norvegicus similar to CYTIDINE DEAMINASE (CYTIDINE AMINOHYDROLA XM\_342955  
 Rattus norvegicus ubiquitin-activating enzyme E1-domain containing 1 (Ube1dc1), rNM\_001009669  
 Rattus norvegicus similar to transcription elongation factor B (SIII) polypeptide 2 (18 XM\_345990  
 Rattus norvegicus similar to RIKEN cDNA 1700001E04 (LOC301748), mRNA [XM\_XM\_217497  
 Nucleoplasmin-related protein (Nuclear protein B23 NM\_012992  
 Rattus norvegicus similar to glyceraldehyde-3-phosphate dehydrogenase (phospho XM\_219750  
 unknown function BQ207420  
 Rattus norvegicus similar to mena protein (LOC360891), mRNA [XM\_341165] XM\_341165  
 Rattus norvegicus similar to Tceb2 protein (LOC287618), mRNA [XM\_220759] XM\_220759  
 mannosyl (alpha-1,6-)-glycoprotein beta-1,2-N-acetylglucosaminyltransferase NM\_053604  
 Rattus norvegicus glutathione synthetase (Gss), mRNA [NM\_012962] NM\_012962  
 Rattus norvegicus similar to glyceraldehyde-3-phosphate dehydrogenase (LOC3641 XM\_344586  
 Unknown  
 similar to Protein:NP\_080455 RIKEN cDNA 1300003D03 gene [Mus musculus]. scc CB605819  
 Rattus norvegicus similar to Ras-related protein Rab-1A (YPT1-related protein) (LO XM\_229263  
 Rattus norvegicus similar to glyceraldehyde-3-phosphate dehydrogenase (phospho XM\_235346  
 S-100 related protein, clone 42C NM\_031114  
 Rattus norvegicus similar to microtubule-actin crosslinking factor (LOC298511), mR XM\_216526  
 Rattus norvegicus similar to glyceraldehyde-3-phosphate dehydrogenase (LOC289 XM\_213991  
 Rattus norvegicus Unknown (protein for MGC:72968) (MGC72968), mRNA [NM\_19 NM\_198730  
 Rattus norvegicus SDA1 domain containing 1 (Sdad1), mRNA [NM\_001006958] NM\_001006958  
 Rattus norvegicus RAS related protein 1b (Rap1b), mRNA [NM\_134346] NM\_134346  
 Rattus norvegicus eukaryotic translation initiation factor 4A, isoform 1 (Eif4a1), mR NM\_199372  
 Rattus norvegicus similar to glyceraldehyde-3-phosphate dehydrogenase (phospho XM\_346342  
 Rattus norvegicus eukaryotic translation initiation factor 4A, isoform 1 (Eif4a1), mR NM\_199372  
 ESTs AA923925  
 Rattus norvegicus similar to dJ1174N9.1 (novel protein with IBR domain) (LOC313 XM\_233761  
 Rattus norvegicus similar to Cytochrome c, somatic (LOC293174), mRNA [XM\_218 XM\_218990  
 Rattus norvegicus similar to Protein translation factor SUI1 homolog (LOC287703), XM\_213456  
 ESTs, Highly similar to G01932 queuine tRNA-ribosyltransferase [H.sapiens] AA964368  
 BQ202972 UI-R-DN1-cmt-c-07-0-UI.s1 UI-R-DN1 Rattus norvegicus cDNA clone U BQ202972  
 gamma-aminobutyric acid (GABA-A) receptor, subunit delta NM\_017289  
 transcription elongation factor B (SIII) polypeptide 2 (18kD, elongin B) NM\_031129  
 EST345853 Normalized rat brain, Bento Soares Rattus sp. cDNA clone RGIAH77 5 AW914549  
 Rattus norvegicus similar to eukaryotic translation elongation factor 1 epsilon 1 (LO XM\_232665  
 ESTs BF552453  
 ESTs BF564921  
 ESTs, Weakly similar to RB46 MOUSE HISTONE ACETYLTRANSFERASE TYPE I AW915551  
 Rattus norvegicus similar to 0910001A06Rik protein (LOC299909), mRNA [XM\_21 XM\_216922  
 Rattus norvegicus similar to U3 snoRNP-associated protein (LOC363134), mRNA [ XM\_343469  
 ESTs AW144345  
 Rattus norvegicus similar to Alpha enolase (2-phospho-D-glycerate hydro-lyase) (N XM\_227366  
 similar to GCGPROT:Q9Z105 PROTEIN PHOSPHATASE-1 REGULATORY SUBU CB545120  
 Rattus norvegicus similar to 5-azacytidine induced gene 2 (LOC316051), mRNA [XI XM\_236698  
 C79B\_MOUSE B-cell antigen receptor complex associated protein beta-chainprecursor (B-cell-specific  
 ESTs AA964547  
 ESTs AI231476  
 Rattus norvegicus similar to RIKEN cDNA 1110021N07 (LOC362912), mRNA [XM\_XM\_343242  
 Rattus norvegicus similar to YY1 associated factor 2 (LOC362989), mRNA [XM\_34 XM\_343319  
 Hemoglobin, alpha 1 NM\_013096

ESTs AW144474  
Rattus norvegicus olfactory receptor gene Olr1433 (Olr1433), mRNA [NM\_0010005 NM\_001000525  
Rattus norvegicus heat shock protein 1, alpha (Hspca), mRNA [NM\_175761] NM\_175761  
Unknown  
Rattus norvegicus similar to E3 ligase for inhibin receptor (LOC362736), mRNA [XM XM\_343060  
ESTs AA858471  
prostaglandin-endoperoxide synthase 2 NM\_017232  
R.norvegicus mRNA for 3'UTR of amiloride sensitive sodium channel protein. X89818  
Unknown  
Rattus norvegicus similar to RIKEN cDNA 2410141F18 (LOC298144), mRNA [XM\_ XM\_216426  
Rattus norvegicus zinc responsive protein ZD7 (LOC474154), mRNA [NM\_0010070 NM\_001007014  
similar to Translation of nuc:AK021301\_1 Mus musculus 13 days embryo stomach (BU758374  
ESTs BG377688  
Unknown  
nuclear pore complex protein NM\_053830  
Rattus norvegicus similar to RIKEN cDNA 1500016H10 (LOC363388), mRNA [XM\_ XM\_343723  
apelin NM\_031612  
Rattus norvegicus olfactory receptor gene Olr821 (Olr821), mRNA [NM\_001000842 NM\_001000842  
ESTs AI071855  
Rattus norvegicus integral membrane protein 2B (Itm2b), mRNA [NM\_001006963] NM\_001006963  
signal sequence receptor, delta NM\_017199  
Rattus norvegicus similar to ret finger protein (LOC291171), mRNA [XM\_214485] XM\_214485  
Rattus norvegicus similar to Ubce8 protein (LOC295704), mRNA [XM\_215762] XM\_215762  
Rattus norvegicus ERO1-like (*S. cerevisiae*) (Ero1), mRNA [NM\_138528] NM\_138528  
ESTs BF389478  
Rattus norvegicus similar to arginine-rich, mutated in early stage tumors; EST D179 XM\_236614  
SYY\_AQUAE Tyrosyl-tRNA synthetase (Tyrosine--tRNA ligase) (TyrRS). {*Aquifex aeolicus*;}, partial (  
Rattus norvegicus similar to RIKEN cDNA 1700001E04 (LOC363321), mRNA [XM\_ XM\_343661  
ESTs BE118386  
phosphatidylinositol transfer protein NM\_017231  
ESTs BF281809  
Rattus norvegicus similar to hypothetical protein FLJ20436 (LOC302332), mRNA [X XM\_228457  
Unknown  
proteasome (prosome, macropain) subunit, alpha type 5 NM\_017282  
Rattus norvegicus similar to S-phase kinase-associated protein 1A isoform b; organ XM\_344771  
Rattus norvegicus similar to ribosomal protein L37 (LOC309163), mRNA [XM\_2195 XM\_219512  
Rattus norvegicus similar to DNA-binding protein p9 - mouse (LOC364278), mRNA XM\_344312  
Rattus norvegicus similar to Set alpha isoform (LOC288330), mRNA [XM\_221736] XM\_221736  
Rattus norvegicus similar to 4632419K20Rik protein (MGC94288), mRNA [NM\_001 NM\_001005538  
Rattus norvegicus similar to 26S proteasome subunit p40.5 (LOC365388), mRNA [XM\_344976  
Rattus norvegicus Integrin beta 7 (Itgb7), mRNA [XM\_343336] XM\_343336  
Transforming growth factor, alpha NM\_012671  
Rattus norvegicus olfactory receptor gene Olr1401 (Olr1401), mRNA [NM\_0010000 NM\_001000003  
ADP-ribosylation factor 4 NM\_024151  
ESTs BF548552  
R.norvegicus N-ras1.2ep pseudogene. X68396  
Rattus norvegicus similar to cullin 3 (LOC301555), mRNA [XM\_217454] XM\_217454  
Rattus norvegicus similar to Tetraspan NET-5 (LOC312728), mRNA [XM\_232372] XM\_232372  
similar to Translation of nuc:BC031132\_1 Mus musculus, cDNA sequence AF233884, clone MGC:371  
Rattus norvegicus similar to proteasome 26S non-ATPase subunit 8 (LOC292766), XM\_214888  
Unknown

|                                                                                     |                            |
|-------------------------------------------------------------------------------------|----------------------------|
| ESTs                                                                                | BF549037                   |
| Protein phosphatase 1, catalytic subunit, beta isoform                              | NM_013065                  |
| Rattus norvegicus similar to Heat shock cognate 71 kDa protein (LOC305639), mRNA    | XM_223759                  |
| ESTs                                                                                | AW144704                   |
| ESTs, Highly similar to T01238 hypothetical protein KIAA0593 [H.sapiens]            | AI105643                   |
| Rattus norvegicus similar to glyceraldehyde-3-phosphate dehydrogenase (phospho      | XM_343421                  |
| Rattus norvegicus similar to glyceraldehyde-3-phosphate dehydrogenase (phospho      | XM_230775                  |
| Rattus norvegicus similar to SDF2 like protein 1 (LOC287936), mRNA                  | [XM_237828 XM_237828       |
| Rattus norvegicus similar to glyceraldehyde-3-phosphate dehydrogenase (LOC311       | XM_230014                  |
| phospholipase A2, activating protein                                                | NM_053866                  |
| Rattus norvegicus zinc responsive protein ZD10B (ZD10B), mRNA                       | [NM_001005381 NM_001005381 |
| Rattus norvegicus similar to chromosome 20 open reading frame 140 (MGC94895),       | NM_001004281               |
| Rattus norvegicus similar to glyceraldehyde-3-phosphate dehydrogenase (LOC317       | XM_228411                  |
| ESTs                                                                                | BG668164                   |
| Unknown                                                                             |                            |
| Rattus norvegicus similar to proteasome 26S ATPase subunit 6 (LOC289990), mRNA      | XM_214147                  |
| Rattus norvegicus similar to calyculin binding protein (MGC93921), mRNA             | [NM_001001004 NM_001004208 |
| Rattus norvegicus GTP cyclohydrolase I feedback regulatory protein (Gchfr), mRNA    | NM_133595                  |
| similar to Mouse, clone MGC:36900 IMAGE:4935223, mRNA, complete cds.                | BQ207246                   |
| ATPase, Ca <sup>++</sup> transporting, cardiac muscle, slow twitch 2                | NM_017290                  |
| ESTs, Weakly similar to T15332 hypothetical protein B0336.5 - Caenorhabditis eleg   | AW526652                   |
| platelet-activating factor acetylhydrolase beta subunit (PAF-AH beta)               | NM_031763                  |
| similar to Protein:NP_003788 embryonic ectoderm development; embryonic ectode       | CB545864                   |
| Rattus norvegicus O-linked mannose beta1,2-N-acetylglucosaminyltransferase (MGC     | NM_001007747               |
| ubiquitin fusion degradation 1-like                                                 | NM_053418                  |
| ESTs, Highly similar to CYSTEINE-RICH INTESTINAL PROTEIN [R.norvegicus]             | BF550246                   |
| phosphatidylinositol transfer protein, beta                                         | NM_053742                  |
| ESTs, Weakly similar to T24897 hypothetical protein T13H5.2 - Caenorhabditis eleg   | AI101462                   |
| Unknown                                                                             |                            |
| Rattus norvegicus similar to glyceraldehyde-3-phosphate dehydrogenase (phospho      | XM_225406                  |
| unknown function                                                                    | BQ208294                   |
| ESTs, Weakly similar to NID2 MOUSE NIDOGEN-2 PRECURSOR [M.musculus]                 | AW253721                   |
| ESTs, Moderately similar to CYCLIN-DEPENDENT KINASE INHIBITOR 1C [M.mu              | AI599589                   |
| Rattus norvegicus similar to translocator of inner mitochondrial membrane 17a; tran | XM_345681                  |
| Unknown                                                                             |                            |
| 26S proteasome, subunit p112                                                        | NM_031978                  |
| Rattus norvegicus similar to DNA segment, Chr 13, Wayne State University 50, exp    | XM_214417                  |
| Rattus norvegicus similar to block of proliferation 1 (LOC300050), mRNA             | [XM_216999 XM_216999       |
| Rattus norvegicus similar to hypothetical protein FLJ20487 (MGC105864), mRNA        | [NM_001008371              |
| Unknown                                                                             |                            |
| Unknown                                                                             |                            |
| Rattus norvegicus Vps24p protein (LOC282834), mRNA                                  | [NM_172331                 |
| Q9ERK2 (Q9ERK2) Neprilysin-like peptidase gamma, partial (3%)                       | [TC470302]                 |
| ESTs, Highly similar to S57500 signal recognition particle - mouse [M.musculus]     | AI104291                   |
| regulator of G-protein signaling 5                                                  | NM_019341                  |
| GTP-binding protein ragB                                                            | NM_053972                  |
| ganglioside expression factor 2                                                     | NM_022706                  |
| ESTs                                                                                | BG671963                   |
| Rattus norvegicus similar to DNA-directed RNA polymerases I, II, and III 7.0 kDa p  | XM_219604                  |
| ESTs                                                                                | AI407429                   |
| Rattus norvegicus similar to mDj4 (LOC362293), mRNA                                 | [XM_342607                 |
|                                                                                     | XM_342607                  |

glycoprotein 110 NM\_031708  
Rattus norvegicus similar to glyceraldehyde-3-phosphate dehydrogenase (phospho XM\_234844  
Rattus norvegicus similar to nucleolar protein family A, member 2 (LOC287273), mRNA XM\_213293  
METHIONINE AMINOPEPTIDASE 2 (EC 3.4.11.18) (METAP 2) (PEPTIDASE M 2) (INITIATION FAC  
ESTs, Moderately similar to T42646 hypothetical protein DKFZp727K171.1 [H.sapie AW142434  
nucleoporin 155kD NM\_053952  
Rattus norvegicus similar to dim1 (LOC291415), mRNA [XM\_214528] XM\_214528  
Rattus norvegicus similar to glyceraldehyde-3-phosphate dehydrogenase (LOC3131 XM\_232707  
Rattus norvegicus similar to heat shock protein 60 (liver); heat shock 60kD protein 1 XM\_227671  
Rattus norvegicus similar to glyceraldehyde-3-phosphate dehydrogenase (phospho XM\_227696  
Rattus norvegicus similar to ataxia telangiectasia and Rad3 related protein; Rad3 re XM\_236563  
proteasome (prosome, macropain) subunit, alpha type 6 NM\_017283  
Rattus norvegicus similar to Cytochrome c, somatic (LOC290019), mRNA [XM\_223 XM\_223985  
Rattus norvegicus similar to transcription elongation factor B (SIII) polypeptide 2 (18 XM\_345894  
ESTs BF557668  
Rattus norvegicus similar to RIKEN cDNA 6720458F09 gene (MGC94251), mRNA |NM\_001007706  
Rattus norvegicus similar to TBP-binding protein ABT1 (LOC306960), mRNA [XM\_2 XM\_225368  
EST291378 Normalized rat brain, Bento Soares Rattus sp. cDNA clone RGIBO29 5 AW141337  
ESTs, Highly similar to PROTEIN TRANSLATION FACTOR SUI1 HOMOLOG [M.m AW141315  
Rattus norvegicus similar to glyceraldehyde-3-phosphate dehydrogenase (phospho XM\_221353  
ESTs AW531363  
Unknown  
Rattus norvegicus similar to Chain , Human Translation Initiation Factor Eif1, Nmr, XM\_226770  
EST BE099797  
Rattus norvegicus similar to RIKEN cDNA 0610016J10 gene (LOC298787), mRNA XM\_216638  
Rattus norvegicus similar to magnesium-dependent phosphatase-1 (LOC290230), r XM\_214200  
acidic calponin AA944422  
Rattus norvegicus glia maturation factor, gamma (Gmfg), mRNA [NM\_181091] NM\_181091  
Rattus norvegicus pR-ET2 encoded oncodevelopmental protein (Loc192269), mRNA NM\_001009618  
Rattus norvegicus WD repeat domain 12 (Wdr12), mRNA [NM\_199410] NM\_199410  
Troponin T, cardiac NM\_012676  
Rattus norvegicus similar to hypothetical protein A (LOC303908), mRNA [XM\_2214 XM\_221407  
Unknown  
acidic calponin AA944422  
Rattus norvegicus LIS1-interacting protein NUDEL; endooligopeptidase A (Nudel), r NM\_133320  
similar to Translation of nuc:BC020161\_1 Mus musculus, clone MGC:28191 IMAGE CB547106  
ESTs AW141214  
Rattus norvegicus similar to DNA replication licensing factor MCM3 (DNA polymera XM\_236988  
HISTONE H4. [Source:SWISSPROT;Acc:P02304] [ENSRNOT00000032660]  
Rattus norvegicus similar to Ac1-163 (LOC317588), mRNA [XM\_229142] XM\_229142  
Unknown  
heat shock protein 60 (liver) NM\_022229  
Rattus norvegicus similar to SoxLZ/Sox6-binding protein Solt (LOC294712), mRNA XM\_215471  
Avian sarcoma virus 17 (v-jun) oncogene homolog NM\_021835  
cytochrome b5, outer mitochondrial membrane isoform NM\_030586  
Rattus norvegicus similar to RIKEN cDNA 9030407H20 (LOC362420), mRNA [XM\_ XM\_342740  
Rattus norvegicus similar to 2010003J03Rik protein (MGC94083), mRNA [NM\_001 NM\_001008305  
ESTs AW919125  
Unknown  
Rattus norvegicus similar to 3-5 exonuclease TREX1 (LOC367170), mRNA [XM\_34 XM\_345983  
Rattus norvegicus similar to Nucleophosmin (NPM) (Nucleolar phosphoprotein B23) XM\_212905

Rattus norvegicus similar to endothelial-derived gene 1 (LOC305391), mRNA [XM\_ XM\_223463  
 lin-7-C NM\_021851  
 ESTs, Moderately similar to Y101\_HUMAN HYPOTHETICAL PROTEIN KIAA0101 AI230347  
 proteasome (prosome, macropain) subunit, alpha type 1 NM\_017278  
 Rattus norvegicus similar to C-terminal tensin-like (LOC303517), mRNA [XM\_23934 XM\_239343  
 Rattus norvegicus similar to glyceraldehyde-3-phosphate dehydrogenase (LOC297 XM\_216321  
 Unknown  
 Rattus norvegicus similar to 60 kDa heat shock protein, mitochondrial precursor (Hs XM\_212804  
 Rattus norvegicus similar to synaptophysin-like protein; pantophysin; Pan I; DNA se XM\_345656  
 Rattus norvegicus similar to SKD1 (LOC360834), mRNA [XM\_341107] XM\_341107  
 Heat shock 10 kD protein 1 (chaperonin 10) NM\_012966  
 Unknown  
 ESTs BG667330  
 heat shock protein 60 (liver) NM\_022229  
 Rattus norvegicus similar to cDNA sequence BC020002 (LOC362324), mRNA [XM\_ XM\_342642  
 Rattus norvegicus DEXRAS1 (Dexas1) (Rasd1), mRNA [XM\_340809] XM\_340809  
 Unknown  
 Rattus norvegicus similar to CCTtheta, theta subunit of the chaperonin containing T XM\_213673  
 Rattus norvegicus similar to glyceraldehyde-3-phosphate dehydrogenase (phospho XM\_233295  
 Rattus norvegicus similar to hippostasin prostate type (LOC292849), mRNA [XM\_2 XM\_218645  
 Rattus norvegicus similar to Nasp protein (LOC302730), mRNA [XM\_229014] XM\_229014  
 long-chain fatty acid coenzyme A ligase 5 NM\_053607  
 Rattus norvegicus similar to mKIAA0849 protein (LOC312938), mRNA [XM\_232642 XM\_232642  
 ubiquitin-conjugating enzyme E2D 2 NM\_031001  
 occludin NM\_031329  
 Unknown  
 Rattus norvegicus similar to hypothetical protein MGC36997 (LOC364184), mRNA | XM\_344256  
 Rattus norvegicus similar to small nuclear RNA activating complex, polypeptide 3, 5 XM\_342855  
 UI-R-Y0-vn-d-05-0-UI.r1 UI-R-Y0 Rattus norvegicus cDNA clone UI-R-Y0-vn-d-05-0 BF523428  
 Rattus norvegicus 14-3-3 protein beta-subtype (Ywhab), mRNA. NM\_019377  
 Rattus norvegicus similar to hypothetical protein MGC10646 (LOC301796), mRNA | XM\_229267  
 Rattus norvegicus MORF-related gene X (Morf4I2), mRNA [NM\_001007714] NM\_001007714  
 Rattus norvegicus similar to Irepo4-pending protein (LOC362154), mRNA [XM\_34 XM\_342454  
 UI-R-A1-ee-a-09-0-UI.r1 UI-R-A1 Rattus norvegicus cDNA clone UI-R-A1-ee-a-09-0 BF550228  
 Rattus norvegicus Mk1 protein (Mk1), mRNA [NM\_134399] NM\_134399  
 Rattus norvegicus unknown mRNA sequence. BQ205155  
 Rattus norvegicus similar to karyopherin beta 3; Ran\_GTP binding protein 5; import XM\_344478  
 similar to Mouse lysosomal thiol reductase IP30 precursor, mRNA, partial cds. BM392398  
 Rattus norvegicus proteasome (prosome, macropain) 26S subunit, ATPase, 4 (Psr NM\_057122  
 ESTs, Highly similar to SMD1\_HUMAN SMALL NUCLEAR RIBONUCLEOPROTEIN AI102591  
 Rattus norvegicus similar to glyceraldehyde-3-phosphate dehydrogenase (phospho XM\_222813  
 Rattus norvegicus clone UI-R-FJ0-cpu-i-10-0-UI unknown mRNA. [AY724476] AY724476  
 Rattus norvegicus mitochondrial ribosomal protein L17 (Mrpl17), mRNA [NM\_13353 NM\_133539  
 Rattus norvegicus similar to Vesicular integral-membrane protein VIP36 precursor ( XM\_214428  
 Rattus norvegicus similar to heterogeneous nuclear ribonucleoprotein D-like; A+U-r XM\_223190  
 ESTs AA819329  
 Proteasome (prosome, macropain) 26S subunit, ATPase NM\_033236  
 Rattus norvegicus similar to RIKEN cDNA 2210021A15 (LOC362575), mRNA [XM\_ XM\_342894  
 cortactin isoform B AW917841  
 Unknown  
 coated vesicle membrane protein NM\_031722



Rattus norvegicus similar to tubulin, beta (LOC291081), mRNA [XM\_238004] XM\_238004  
ESTs BF549650

5-aminoimidazole-4-carboxamide ribonucleotide formyltransferase/IMP cyclohydrolase  
similar to Protein:NP\_031905 developmentally regulated GTP binding protein 1; de  
NM\_031014  
CB546259

Q8BIV5 (Q8BIV5) Antigen NY-CO-3 homolog, partial (94%) [TC463081] BC088296

Rattus norvegicus similar to sid23p (LOC308400), mRNA [XM\_218399] XM\_218399

ESTs, Highly similar to JC7136 peptidylprolyl isomerase (EC 5.2.1.8) - mouse [M.m  
BG381714

R.norvegicus mRNA for p32-subunit of replication protein A. BM385924

Rattus norvegicus similar to glyceraldehyde-3-phosphate dehydrogenase (phospho  
XM\_236489

Unknown

Unknown

Rattus norvegicus similar to Budding uninhibited by benzimidazoles 1 homolog (LOI  
XM\_215849

Rattus norvegicus neural precursor cell expressed, developmentally down-regulate  
NM\_138878

Rattus norvegicus solute carrier family 25 (mitochondrial carrier; adenine nucleotide  
NM\_139100

inositol polyphosphate 5-phosphatase AA964050

Unknown

Unknown

Rattus norvegicus similar to RNA polymerase II elongation factor ELL2 (LOC309911  
XM\_226624  
tulip 1 AF041106

Unknown

ESTs, Moderately similar to AC004882 7 similar to CAA16821 [H.sapiens] BF287558

Rattus norvegicus similar to glyceraldehyde-3-phosphate dehydrogenase (phospho  
XM\_344711

Rattus norvegicus similar to RIKEN cDNA 4632422M10 (LOC294711), mRNA [XM\_ XM\_215474  
NM\_053857

Rattus norvegicus similar to glyceraldehyde-3-phosphate dehydrogenase (phospho  
XM\_346024

ESTs, Highly similar to ALPHA-2-MACROGLOBULIN PRECURSOR [R.norvegicus] BI284261

ESTs, Highly similar to RPCX MOUSE DNA-DIRECTED RNA POLYMERASES I, II AW434092

Rattus norvegicus similar to GDF-1 embryonic growth factor - mouse (LOC306351). XM\_224733

ESTs AI407964

Rattus norvegicus similar to glyceraldehyde-3-phosphate dehydrogenase (phospho  
XM\_219625

Rattus norvegicus RT1 class II, locus Db1 (RT1-Db1), mRNA [NM\_001008884] NM\_001008884

Rattus norvegicus similar to guanylate kinase (LOC303179), mRNA [XM\_220511] XM\_220511

Rattus norvegicus similar to expressed sequence C87860 (LOC310512), mRNA [X  
XM\_227253

Rattus norvegicus similar to Protein translation factor SUI1 homolog (LOC367110), XM\_345952

Rattus norvegicus similar to tropomodulin 3 (LOC300838), mRNA [XM\_217207] XM\_217207

proteasome (prosome, macropain) subunit, alpha type 2 NM\_017279

Rattus norvegicus similar to disrupter of silencing SAS10 (LOC305258), mRNA [X  
XM\_223335

Rattus norvegicus similar to ribosomal protein P0-like protein; 60S acidic ribosomal  
XM\_216567

Q7TQ12 (Q7TQ12) Aa1114, partial (5%) [TC462103]

Rattus norvegicus RAP1B, member of RAS oncogene family (Rap1b), mRNA. NM\_134346

ESTs AI227823

Rattus norvegicus similar to Glyceraldehyde 3-phosphate dehydrogenase (GAPDH)  
XM\_234433

Rattus norvegicus ubiquitin specific protease 14 (Usp14), mRNA [NM\_001008301] NM\_001008301

Rattus norvegicus similar to glyceraldehyde-3-phosphate dehydrogenase (LOC294  
XM\_228217

Rattus norvegicus thioredoxin domain containing 9 (Txndc9), mRNA [NM\_172032] NM\_172032

B cell lymphoma 2 like AW142029

growth factor receptor bound protein 2 D49848

ESTs AW143485

Rattus norvegicus similar to RIKEN cDNA D030070L09 (LOC291737), mRNA [XM\_ XM\_214605

Rattus norvegicus similar to Translation initiation factor IF-2 (LOC361491), mRNA [ XM\_341770

Rattus norvegicus similar to glyceraldehyde-3-phosphate dehydrogenase (LOC289  
XM\_223044

Unknown

Rattus norvegicus similar to cholesterol 25-hydroxylase (LOC309527), mRNA [XM\_XM\_220063

Rattus norvegicus similar to glyceraldehyde-3-phosphate dehydrogenase (phospho XM\_220866

Rattus norvegicus similar to Heat shock 60 kD protein 1 (LOC289614), mRNA [XM\_XM\_212746

Rattus norvegicus similar to 1-acylglycerol-3-phosphate-gamma (LOC294324), mRN XM\_215367

Rattus norvegicus similar to glyceraldehyde-3-phosphate dehydrogenase (LOC288 XM\_213595

Rattus norvegicus similar to glyceraldehyde-3-phosphate dehydrogenase (phospho XM\_225859

Rattus norvegicus protein phosphatase 4, regulatory subunit 1 (Ppp4r1), mRNA [NM NM\_080907

similar to Mouse (Mus musculus domesticus) mitochondrial carrier homolog 2 mRN. BQ207841

Unknown

ZAP 36/annexin IV NM\_024155

ESTs AW533662

Rattus norvegicus similar to FKBP51 (LOC361810), mRNA [XM\_342103] XM\_342103

Rattus norvegicus methionine adenosyltransferase II, alpha, mRNA (cDNA clone M BC062394

ESTs, Highly similar to JC5221 stomatin - mouse [M.musculus] AW914950

Unknown

ESTs AI548388

similar to Translation of nuc:AF182415\_1 Homo sapiens MDS014 (MDS014) mRNA BQ204091

Rattus norvegicus similar to Methionine aminopeptidase 2 (MetAP 2) (Peptidase M XM\_212948

Rattus norvegicus similar to Aa2-277 (LOC309176), mRNA [XM\_219525] XM\_219525

Unknown

Rattus norvegicus pseudogene for annexin II [AB072614] AB072614

cytoplasmic beta-actin NM\_031144

Protein phosphatase 2 (formerly 2A), catalytic subunit, beta isoform NM\_017040

ESTs AW915339

Rattus norvegicus cell division cycle 42 homolog (S. cerevisiae) (Cdc42), mRNA [NM NM\_171994

Rattus norvegicus similar to hypothetical protein D10Erd718e (LOC314799), mRNA XM\_235154

alkyl-dihydroxyacetonephosphate synthase precursor NM\_053350

Rattus norvegicus similar to coproporphyrinogen oxidase (LOC304024), mRNA [XM XM\_221545

Rattus norvegicus similar to glyceraldehyde-3-phosphate dehydrogenase (phospho XM\_344274

Rattus norvegicus similar to tubulin, beta (LOC291081), mRNA [XM\_238004] XM\_238004

similar to Protein:NP\_055187 ring finger protein 11; Sid1669 protein [Homo sapiens CB546288

Rattus norvegicus similar to lysosomal-associated transmembrane protein 4 beta (L XM\_235393

Rattus norvegicus similar to Probable RNA-dependent helicase p68 (DEAD-box prc NM\_001007613

lipocortin I [rats, Genomic, 270 nt, segment 1 of 13]. S57440

UI-R-C3-sz-h-08-0-UI.r1 UI-R-C3 Rattus norvegicus cDNA clone UI-R-C3-sz-h-08-0 BF543500

myeloid cell leukemia sequence 1 NM\_021846

heat shock protein 60 (liver) NM\_022229

Rattus norvegicus similar to RIKEN cDNA 2610101N07 (LOC364183), mRNA [XM\_XM\_344255

Rattus norvegicus similar to mitotic control protein dis3 homolog (LOC306103), mRN XM\_224449

Rattus norvegicus similar to Thyroid transcription factor 1 (Thyroid nuclear factor 1) XM\_216720

Rattus norvegicus similar to RIKEN cDNA 1500006O09 (LOC305714), mRNA [XM\_XM\_223828

similar to Protein:NP\_080395 RIKEN cDNA 2410046H15 gene [Mus musculus]. scc CB548241

Rattus norvegicus hypothetical LOC305984 (LOC305984), mRNA [XM\_224308] XM\_224308

unknown function BQ204111

Rattus norvegicus golgi autoantigen, golgin subfamily a, 7 (Golga7), mRNA [NM\_00 NM\_001007731

ESTs BI295823

Rattus norvegicus similar to mDj4 (LOC362293), mRNA [XM\_342607] XM\_342607

Rattus norvegicus valosin-containing protein (Vcp), mRNA [NM\_053864] NM\_053864

RNA binding protein p45AUF1 NM\_024404

Rattus norvegicus similar to glyceraldehyde-3-phosphate dehydrogenase (LOC367 XM\_346338

protease (prosome, macropain) 26S subunit, ATPase 1 NM\_057123  
 ATP-binding cassette, sub-family G (WHITE), member 1 NM\_053502  
 transcytosis associated protein NM\_019379  
 Unknown  
 ESTs, Highly similar to ICSB MOUSE INTERFERON CONSENSUS SEQUENCE B AW916350  
 Rattus norvegicus hypothetical LOC299262 (LOC299262), mRNA [XM\_238465] XM\_238465  
 Inositol (myo)-1(or 4)-monophosphatase 1 NM\_032057  
 Rattus norvegicus similar to proteasome subunit iota (LOC365554), mRNA [XM\_34 XM\_345096  
 Rattus norvegicus similar to spindle assembly checkpoint protein (LOC297176), mF XM\_216161  
 EST531427 Rat gene index, normalized rat, norvegicus Rattus norvegicus cDNA cl BI395556  
 similar to Protein:NP\_009148 programmed cell death 10; apoptosis-related protein CB545171  
 Rattus norvegicus similar to T-complex expressed gene 1; SPRY domain-containing XM\_220230  
 Rattus norvegicus similar to chromosome 14 open reading frame 138 (LOC362748) XM\_343073  
 ESTs AW918107  
 Rattus norvegicus similar to uridine phosphorylase (LOC289801), mRNA [XM\_2140 XM\_214096  
 Q7TQ12 (Q7TQ12) Aa1114, partial (10%) [TC462533]  
 Bcl2-associated X protein NM\_017059  
 Rattus norvegicus similar to glyceraldehyde-3-phosphate dehydrogenase (phospho XM\_229973  
 Rattus norvegicus similar to ubiquitin-conjugating enzyme E2 variant 1 isoform b; D XM\_345472  
 Rattus norvegicus similar to CG11943-PB (LOC362335), mRNA [XM\_342657] XM\_342657  
 Rattus norvegicus thioredoxin-like (32kD) (Txnl), mRNA. NM\_080887  
 Rattus norvegicus similar to leucine zipper-EF-hand containing transmembrane proi XM\_223541  
 AY069755 LP11503p {Drosophila melanogaster;}, partial (5%) [TC488927]  
 Unknown  
 Unknown  
 Unknown  
 Rattus norvegicus similar to Acidic nucleoplasmic DNA-binding protein 1 (And-1) (L XM\_223933  
 Rattus norvegicus host cell factor 2 (Hcfc2), mRNA [NM\_001008357] NM\_001008357  
 Rattus norvegicus cDNA clone MGC:94141 IMAGE:7127379, complete cds. [BC07! BC079131  
 proteasome (prosome, macropain) subunit, beta type, 7 NM\_053532  
 ESTs AA819788  
 similar to mouse f-box and WD-40 domain protein 1B, clone IMAGE:3591748, mRN BQ195857  
 Rattus norvegicus glutathione peroxidase (GSH-PO) mRNA, complete cds. M21210.1  
 Rattus norvegicus CCAAT/enhancer binding protein ,gamma (Cebpg), mRNA [XM\_ XM\_341842  
 Rattus norvegicus Ba1-643 mRNA, complete cds. [AY325226] AY325226  
 Rattus norvegicus similar to proteasome 26S non-ATPase subunit 8 (LOC311067), XM\_229953  
 ESTs AA957447  
 Rat mRNA for 5E5 antigen, complete cds. D37934.1  
 similar to Protein:NP\_003866 guanine monophosphate synthetase; guanosine 5 -m CB606342  
 Unknown  
 Unknown  
 EST531530 Rat gene index, normalized rat, norvegicus Rattus norvegicus cDNA cl BI395659  
 Rattus norvegicus cyclin-dependent kinase inhibitor 1C, p57 (Cdkn1c), mRNA [NM\_ NM\_182735  
 ADP-ribosylation factor 4 NM\_024151  
 stress-inducible chaperone mt-GrpE#1 NM\_024487  
 Rattus norvegicus similar to glyceraldehyde-3-phosphate dehydrogenase (LOC290! XM\_225042  
 Rattus norvegicus similar to D8Ertd531e protein (LOC290775), mRNA [XM\_214353 XM\_214353  
 Rattus norvegicus similar to actin related protein 2/3 complex subunit 2; ARP2/3 prc XM\_217432  
 vacuolar proton-ATPase subunit M9.2 NM\_053578  
 Rattus norvegicus phospholipase A2, group IVA (cytosolic, calcium-dependent) (Plc NM\_133551  
 MMU6584 eIF2 gamma {Mus musculus;}, partial (17%) [TC493369]

Rattus norvegicus similar to Small nuclear ribonucleoprotein Sm D1 (snRNP core protein) XM\_214621  
 Inhibitor of DNA binding 3, dominant negative helix-loop-helix protein NM\_013058  
 Rattus norvegicus similar to glyceraldehyde-3-phosphate dehydrogenase (LOC364: XM\_344629  
 suppression of tumorigenicity 13 (colon carcinoma) Hsp70-interacting protein NM\_031122  
 Unknown  
 similar to mouse DEAD/H (Asp-Glu-Ala-Asp/His) box polypeptide 15, clone MGC:58 BQ202175  
 Glutathione peroxidase 1 NM\_030826  
 Q8CDY0 (Q8CDY0) N-myc downstream regulated 3, partial (13%) [TC473776]  
 Rattus norvegicus FIP1-like 1 (Fip111), mRNA [NM\_001008295] NM\_001008295  
 Rattus norvegicus similar to glyceraldehyde-3-phosphate dehydrogenase (phospho XM\_225838  
 ESTs BF396985  
 ESTs AW915249  
 Rattus norvegicus similar to UBE2I protein (LOC305375), mRNA [XM\_223442] XM\_223442  
 Lipoprotein lipase NM\_012598  
 YME1 (S.cerevisiae)-like 1 NM\_053682  
 Rattus norvegicus TOM70 protein (TOM70), mRNA [NM\_212519] NM\_212519  
 Unknown  
 Rattus norvegicus Syndecan 1 (Sdc1), mRNA. NM\_013026  
 Rattus norvegicus similar to Hypothetical protein MGC19163 (LOC295971), mRNA XM\_215795  
 Rattus norvegicus nitrilase 1 (Nit1), mRNA [NM\_182668] NM\_182668  
 integral membrane protein Tmp21-I (p23) NM\_053467  
 proteasome (prosome, macropain) subunit, beta type 1 NM\_053590  
 Nucleoplasmin-related protein (Nuclear protein B23 NM\_012992  
 CB547330 AMGNNUC:CR2-00040-F3-A Colon Rat 2 (10398) Rattus norvegicus c[ CB547330  
 Rat mRNA for glutathione S-transferase P subunit. NM\_138974  
 Rattus norvegicus neuroblastoma RAS viral (v-ras) oncogene homolog (Nras), mRNA NM\_080766  
 Acetyl-CoA acyltransferase, 3-oxo acyl-CoA thiolase A, peroxisomal J02749  
 Rattus norvegicus similar to RIKEN cDNA 2310008M10 (LOC310613), mRNA [XM\_ XM\_227387  
 Rattus norvegicus similar to glyceraldehyde-3-phosphate dehydrogenase (LOC362: XM\_342527  
 Rattus norvegicus similar to glyceraldehyde-3-phosphate dehydrogenase (phospho XM\_229109  
 Rattus norvegicus similar to glyceraldehyde-3-phosphate dehydrogenase (phospho XM\_342166  
 Rattus norvegicus similar to proteasome 26S ATPase subunit 6 (LOC310988), mRNA XM\_227832  
 Rattus norvegicus similar to ubiquitin-protein ligase (EC 6.3.2.19) E1 - mouse (LOC XM\_234520  
 T-complex 1 NM\_012670  
 Rattus norvegicus SH3-domain kinase binding protein 1 (Sh3kbp1), mRNA [NM\_05 NM\_053360  
 Beta-2-microglobulin NM\_012512  
 similar to Protein:NP\_081218 RIKEN cDNA 1810015E19 [Mus musculus]. score=1. CB544301  
 Rattus norvegicus similar to sex-lethal interactor homolog (LOC361640), mRNA [XM\_ XM\_341919  
 nadrin NM\_022244  
 Rattus norvegicus actin-related protein 3 homolog (yeast) (Actr3), mRNA [XM\_3411 XM\_341112  
 Rattus norvegicus similar to mitochondrial ribosomal protein L18 (LOC292244), mRNA XM\_214751  
 Rattus norvegicus UDP-glucose ceramide glucosyltransferase (Ugcg), mRNA [NM\_ NM\_031795  
 Rattus norvegicus similar to Sid393p (LOC367344), mRNA [XM\_346097] XM\_346097  
 HUMGLYSYN glycogen synthase kinase 3 {Homo sapiens;} , partial (4%) [TC506223]  
 heterogeneous nuclear ribonucleoprotein A/B AF108653  
 Rattus norvegicus similar to Rab24 protein (LOC361208), mRNA [XM\_341490] XM\_341490  
 Shultzomica04000 Rat lung airway and parenchyma cDNA libraries Rattus norvegicus CF110749  
 similar to Protein:NP\_065616 RIKEN cDNA A030009H04 [Mus musculus]. score=3. CB547985  
 EST AA819657  
 testis-specific farnesyl pyrophosphate synthetase NM\_031840  
 Unknown

Rattus norvegicus similar to stress-induced-phosphoprotein 1 (Hsp70/Hsp90-organizing protein) [NM\_218684]  
 Rattus norvegicus Ns5atp9 protein (Ns5atp9), mRNA [NM\_201418] NM\_201418  
 EST345817 Normalized rat brain, Bento Soares Rattus sp. cDNA clone RGIAG54 5AW914513  
 Rattus norvegicus similar to glyceraldehyde-3-phosphate-dehydrogenase (EC 1.2.1.12) [XM\_234875]  
 Rattus norvegicus guanine nucleotide binding protein (G protein), gamma 8 subunit [NM\_139185]  
 AAQ91031 (AAQ91031) LRRGT00075, partial (4%) [TC462291]  
 UI-R-BT1-ajz-e-07-0-UI.r1 UI-R-BT1 Rattus norvegicus cDNA clone UI-R-BT1-ajz-e BF566146  
 Rattus norvegicus galactose transporter (LOC287642), mRNA [NM\_199081] NM\_199081  
 EST, Moderately similar to 1512311A SRP protein 54kD [M.musculus] BG667707  
 similar to Translation of nuc:AK013150\_1 Mus musculus 10, 11 days embryo cDNA CB605662  
 Rattus norvegicus similar to T-cell activation WD repeat protein (LOC361305), mRNA [XM\_341590]  
 clathrin, heavy polypeptide (Hc) [NM\_019299]  
 ESTs [AI237189]  
 Rattus norvegicus similar to RIKEN cDNA 1810022F11 (LOC288369), mRNA [XM\_213688]  
 ras-related protein [NM\_031090]  
 Rattus norvegicus stress-induced-phosphoprotein 1 (Hsp70/Hsp90-organizing protein) [NM\_138911]  
 ESTs, Weakly similar to JC6133 deubiquitinating enzyme - mouse [M.musculus] AI030501  
 Unknown  
 N-acetyltransferase 1 (arylamine N-acetyltransferase) [NM\_053853]  
 Q9ULC4 (Q9ULC4) Multiple COPIES in A T-cell MALIGNANCIES (MCT-1 protein), partial (94%) [TC462291]  
 Rattus norvegicus splicing factor YT521-B (YT521), mRNA. [NM\_133423]  
 Unknown  
 Rattus norvegicus vesicle-associated membrane protein 3 (Vamp3), mRNA. [NM\_057097]  
 Tyrosine 3-monooxygenase/tryptophan 5-monooxygenase activation protein, eta polypeptide chain [NM\_013052]  
 Rattus norvegicus peroxisomal Ca-dependent solute carrier-like protein (Pcscl), mRNA [NM\_145677]  
 Unknown  
 Rattus norvegicus similar to U5 snRNP-specific protein (Prp8-binding) (LOC313056) [XM\_232775]  
 ESTs, Highly similar to T14770 hypothetical protein DKFZp566E144.1 [H.sapiens] BG664661  
 potassium channel, subfamily K, member 6 (TWIK-2) [NM\_053806]  
 elongation factor SIII p15 subunit [NM\_022593]  
 Rattus norvegicus similar to transcription factor-like protein 4 beta (LOC360631), mRNA [XM\_340906]  
 ESTs, Weakly similar to I49441 Mouse 19.5 mRNA, complete cds - mouse [M.musculus] BF542726  
 Rattus norvegicus chaperonin containing TCP1, subunit 3 (gamma) (Cct3), mRNA [NM\_199091]  
 Rattus norvegicus similar to RIKEN cDNA 2310036D22 (MGC94135), mRNA [NM\_001004267]  
 Rattus norvegicus similar to nucleotide-binding protein short form (LOC287125), mRNA [XM\_213239]  
 Protein phosphatase 2 (formerly 2A), catalytic subunit, beta isoform [NM\_017040]  
 Rattus norvegicus dopamine responsive protein (LOC171057), mRNA [NM\_133535]  
 similar to Translation of nuc:BC017012\_1 Homo sapiens, clone MGC:8804 IMAGE: BQ194339  
 ESTs, Weakly similar to T19334 hypothetical protein R74.1 - Caenorhabditis elegans [BE119004]  
 Unknown  
 ESTs [BF283004]  
 ESTs, Highly similar to JC6161 kinesin-associated protein KAP3 splice form A - mouse [AI030814]  
 Rattus norvegicus similar to bcl2-associated X protein (LOC287723), mRNA [XM\_212676]  
 BM986596 EST594190 Rat gene index, normalized rat, norvegicus Rattus norvegicus [BM986596]  
 Rattus norvegicus similar to Lamb3 protein (LOC360901), mRNA [XM\_341176] XM\_341176  
 Rattus norvegicus similar to glyceraldehyde-3-phosphate dehydrogenase (LOC299:XM\_234458)  
 Rattus norvegicus similar to RIKEN cDNA 2410174K12 (LOC290408), mRNA [XM\_214242]  
 Rattus norvegicus similar to RIKEN cDNA 1500031M22 (LOC294718), mRNA [XM\_215477]  
 RPT protein similar to yeast MRS2 [NM\_024001]  
 Rattus norvegicus synaptogenesis-related mRNA sequence 7, 3' untranslated region [AF452728]  
 Rattus norvegicus gamma-hydroxybutyrate receptor mRNA, complete cds. [AY485933]

Rattus norvegicus tumor susceptibility gene 101 (Tsg101), mRNA [NM\_181628] NM\_181628  
 ESTs, Weakly similar to DDX4 RAT DEAD BOX PROTEIN 4 [R.norvegicus] AI600178  
 ESTs BF397678  
 Rattus norvegicus tropomyosin isoform 6 (LOC286890), mRNA [NM\_173111] NM\_173111  
 Rattus norvegicus similar to tubulin, beta (LOC291081), mRNA [XM\_238004] XM\_238004  
 UI-R-EP0-coc-f-22-0-UI.s1 UI-R-EP0 Rattus norvegicus cDNA clone UI-R-EP0-coc- BQ208403  
 protein tyrosine phosphatase 4a1 NM\_031579  
 Unknown  
 similar to Translation of nuc:BC016629\_1 Mus musculus, clone MGC:11800 IMAGE CB545262  
 testis-specific farnesyl pyrophosphate synthetase NM\_031840  
 ESTs, Highly similar to YS64\_HUMAN HYPOTHETICAL PROTEIN S164 [H.sapien] BF565370  
 H2A histone family, member Z NM\_022674  
 ESTs BE116217  
 Rattus norvegicus similar to breast carcinoma amplified sequence 2; spliceosome a XM\_215664  
 microtubule-associated proteins 1A/1B light chain 3 NM\_022867  
 Rattus norvegicus similar to hypothetical protein FLJ22728 (LOC293173), mRNA [X XM\_215022  
 Rattus norvegicus similar to Tnfaip2 protein (LOC299340), mRNA [XM\_216786] XM\_216786  
 Rattus norvegicus similar to Tde1 protein (MGC94574), mRNA [NM\_001008312] NM\_001008312  
 Rattus norvegicus similar to glyceraldehyde-3-phosphate dehydrogenase (LOC367: XM\_346044  
 Cytochrome C, expressed in somatic tissues NM\_012839  
 Rattus norvegicus similar to actin - Hydra attenuata (LOC363564), mRNA [XM\_343 XM\_343875  
 Rattus norvegicus similar to CG7275-PA (LOC362902), mRNA [XM\_343231] XM\_343231  
 Rattus norvegicus similar to NADP+-specific isocitrate dehydrogenase (LOC361596) XM\_341875  
 pyruvate dehydrogenase kinase 2 subunit p45 (PDK2) NM\_030872  
 Unknown  
 Rattus norvegicus similar to 60S RIBOSOMAL PROTEIN L17 (L23) (AMINO ACID ; XM\_228987  
 Unknown  
 ESTs AW917950  
 Rattus norvegicus similar to dispatched (LOC289338), mRNA [XM\_213964] XM\_213964  
 Rattus norvegicus similar to Heph protein (LOC302479), mRNA [XM\_217582] XM\_217582  
 Unknown  
 ESTs BF289858  
 Rattus norvegicus hypothetical LOC295216 (LOC295216), mRNA [XM\_238238] XM\_238238  
 similar to Protein:NP\_080236 RIKEN cDNA 1810073E21 gene [Mus musculus]. scc BQ193605  
 ESTs, Highly similar to PPS1 MOUSE BIFUNCTIONAL 3'-PHOSPHOADENOSINE AI229840  
 Rattus norvegicus LOC361748 (LOC361748), mRNA [XM\_346997] XM\_346997  
 Unknown  
 ESTs, Weakly similar to UBC3\_HUMAN UBIQUITIN-CONJUGATING ENZYME E2- BF287028  
 transaldolase 1 AA964693  
 Rattus norvegicus Mg87 protein (Mg87), mRNA [NM\_134410] NM\_134410  
 similar to Protein:NP\_081791 RIKEN cDNA 2010005M05; RIKEN cDNA 3830421F CA333817  
 ESTs AI013088  
 Rattus norvegicus similar to O-sialoglycoprotein endopeptidase (LOC290028), mRNA XM\_214163  
 ESTs BI281889  
 Rat mitochondrial ATP synthase beta subunit mRNA, complete cds AA859178  
 ESTs, Weakly similar to 60S RIBOSOMAL PROTEIN L37 [R.norvegicus] BF419552  
 Rattus norvegicus histone deacetylase 5 (Hdac5), mRNA [XM\_213469] XM\_213469  
 Unknown  
 Unknown  
 Rattus norvegicus similar to ribosomal protein L26 (LOC291387), mRNA [XM\_2256 XM\_225658  
 Unknown

|                                                                                                |              |
|------------------------------------------------------------------------------------------------|--------------|
| ESTs                                                                                           | AW142697     |
| ESTs                                                                                           | AI556126     |
| Rattus norvegicus tumor-associated calcium signal transducer 1 (Tacstd1), mRNA [NM_138541      |              |
| Rattus norvegicus fertility related protein WMP1 (Wmp1), mRNA [NM_138862]                      | NM_138862    |
| ESTs                                                                                           | BF560938     |
| Rattus norvegicus similar to ribosomal protein L6 (LOC366145), mRNA [XM_34541                  | XM_345411    |
| ESTs, Moderately similar to JC5644 acyl-CoA thiolesterase [H.sapiens]                          | AW916902     |
| ESTs                                                                                           | AW917394     |
| ESTs                                                                                           | AA957762     |
| ESTs                                                                                           | AW143510     |
| ESTs                                                                                           | AW918562     |
| Rattus norvegicus similar to Ser/Arg-related nuclear matrix protein; plenty-of-proline         | XM_233556    |
| ESTs                                                                                           | BF398023     |
| ESTs, Moderately similar to T08785 hypothetical protein DKFZp586A0522.1 [H.sap                 | BI275189     |
| ESTs                                                                                           | AW918028     |
| Unknown                                                                                        |              |
| ESTs                                                                                           | BF565803     |
| Rattus norvegicus similar to Integrin alpha-6 precursor (VLA-6) (CD49f) (LOC36752              | XM_346197    |
| Rattus norvegicus similar to hypothetical protein CL25084 (LOC289874), mRNA [XI                | XM_214121    |
| Unknown                                                                                        |              |
| glucose-6-phosphatase, transport protein 1                                                     | NM_031589    |
| Creatine kinase, brain                                                                         | NM_012529    |
| Unknown                                                                                        |              |
| Rattus norvegicus similar to Hepatocellular carcinoma-associated antigen 58 homol              | XM_230785    |
| nuclear receptor subfamily 3, group C, member 1                                                | NM_012576    |
| ESTs                                                                                           | AW143988     |
| Rattus norvegicus similar to stathmin (LOC363108), mRNA [XM_343441]                            | XM_343441    |
| Rattus norvegicus similar to 60S ribosomal protein L13 (A52) (LOC364882), mRNA                 | XM_344690    |
| Rattus norvegicus similar to Transmembrane 7 superfamily protein member 3 precu                | XM_216312    |
| Rattus norvegicus general transcription factor II I (Gtf2i), mRNA [NM_001001512]               | NM_001001512 |
| ESTs, Highly similar to DP1 MOUSE POLYPOSIS LOCUS PROTEIN 1 HOMOLOG                            | AA848813     |
| Rattus norvegicus similar to PAP-1 (LOC363032), mRNA [XM_343363]                               | XM_343363    |
| Rattus norvegicus similar to Stathmin (Phosphoprotein p19) (pp19) (Oncoprotein 1E              | XM_220874    |
| ESTs                                                                                           | AI555341     |
| Unknown                                                                                        |              |
| Leukemia-associated cytosolic phosphoprotein stathmin                                          | NM_017166    |
| Rattus norvegicus similar to Pseudoautosomal GTP-binding protein-like protein (LO              | XM_344118    |
| ESTs                                                                                           | AI177507     |
| ESTs                                                                                           | BI281768     |
| Unknown                                                                                        |              |
| Q9MKC0 (Q9MKC0) Cytochrome c oxidase I (Cytochrome c oxidase polypeptide I) (Fragment) , parti |              |
| ESTs, Moderately similar to YCD1_HUMAN HYPOTHETICAL PROTEIN CGI-131 [IAI145832                 |              |
| calpactin I heavy chain                                                                        | BF389798     |
| NADH ubiquinone oxidoreductase subunit B13                                                     | AA874885     |
| ESTs, Weakly similar to CD59 RAT CD59 GLYCOPROTEIN PRECURSOR [R.norv                           | BG666613     |
| Rattus norvegicus microsomal glutathione S-transferase 1 (Mgst1), mRNA [NM_13                  | NM_134349    |
| Rattus norvegicus similar to RIKEN cDNA D130059P03 gene (LOC312248), mRNA                      | XM_231617    |
| double-stranded RNA-binding protein p74                                                        | BI291905     |
| ESTs                                                                                           | BF549558     |
| ESTs                                                                                           | AI228214     |
| Rattus norvegicus similar to ribosomal protein S15 (LOC295574), mRNA [XM_2278                  | XM_227850    |

Rattus norvegicus similar to RIKEN cDNA 4933431D05 (LOC367530), mRNA [XM\_XM\_346200 Q7PI42 (Q7PI42) ENSANGP00000024316 (Fragment), partial (9%) [TC473458]  
 Rat laminin receptor mRNA, 3' end BG153272  
 Rattus norvegicus similar to 3-phosphoglycerate dehydrogenase (LOC294985), mRNA XM\_227056  
 Rattus norvegicus ATP-binding cassette, sub-family B (MDR/TAP), member 6 (Abc1) NM\_080582  
 5-hydroxytryptamine (serotonin) receptor 3B NM\_022189  
 Unknown  
 telomerase protein component 1 NM\_022591  
 Q28610 (Q28610) Na<sup>+</sup>/glucose cotransporter-related protein, partial (10%) [TC483332]  
 UI-R-CA1-bct-e-09-0-UI.s1 UI-R-CA1 Rattus norvegicus cDNA clone UI-R-CA1-bct- BF391710  
 ESTs BF284190  
 Rattus norvegicus CDK109 mRNA. Y17323  
 Rattus norvegicus enoyl Coenzyme A hydratase, short chain 1 (Echs1), mRNA. NM\_078623  
 Q69566 (Q69566) U88, partial (9%) [TC476741]  
 ESTs, Weakly similar to SX10 RAT TRANSCRIPTION FACTOR SOX-10 [R.norveg AI102567  
 Rattus norvegicus similar to Proyl 4-hydroxylase alpha IIa subunit (LOC360526), mRNA XM\_340798  
 similar to Translation of nuc:AK003991\_1 Mus musculus 18 days embryo cDNA, RI CB544880  
 Rattus norvegicus similar to leprecan-like protein 2 (LOC297595), mRNA [XM\_2162 XM\_216278  
 Rattus norvegicus similar to KIAA1992 protein (LOC295654), mRNA [XM\_229983] XM\_229983  
 ESTs AI060229  
 ESTs BF542516  
 Rattus norvegicus similar to PHD finger protein 3 (LOC363210), mRNA [XM\_34354 XM\_343548  
 Rattus norvegicus zinc finger protein 22 (KOX 15) (Znf22), mRNA. NM\_133579  
 ESTs AW914766  
 Unknown  
 Rattus norvegicus similar to hypothetical protein MGC13047 (MGC94853), mRNA [NM\_001004261  
 Unknown  
 rhodopsin kinase NM\_031096  
 Rattus norvegicus similar to Voltage-dependent anion-selective channel protein 1 (XM\_216715  
 x-ray repair cross-complementing group 1 protein NM\_053435  
 dopa/tyrosine sulfotransferase NM\_022513  
 ESTs, Moderately similar to T17239 hypothetical protein DKFZp434B027.1 [H.sapiens] BF566642  
 Rattus norvegicus IMP (inosine monophosphate) dehydrogenase 2 (Impdh2), mRNA. NM\_199099  
 Unknown  
 integrin-associated protein NM\_019195  
 Unknown  
 Rattus norvegicus similar to 60S RIBOSOMAL PROTEIN L13 (LOC298125), mRNA XM\_233045  
 Rattus norvegicus mRNA for annexin V-binding protein (ABP-10), partial cds. D64062  
 Rattus norvegicus similar to 60S RIBOSOMAL PROTEIN L12 (LOC367126), mRNA XM\_345962  
 Unknown  
 Rattus norvegicus similar to hypothetical protein MGC3207 (LOC288912), mRNA [XM\_213843  
 ATP-binding cassette, sub-family A (ABC1), member 2 NM\_024396  
 ESTs AW918243  
 Rattus norvegicus WAP four-disulfide core domain 1 (Wfdc1), mRNA. NM\_133581  
 Unknown  
 enoyl hydratase-like protein, peroxisomal NM\_022594  
 ESTs, Highly similar to 60S RIBOSOMAL PROTEIN L12 [R.norvegicus] AI170643  
 ESTs, Moderately similar to JC4914 anti-sigma cross-reacting protein homolog I (BE109962  
 Rattus norvegicus similar to KIAA1952 protein (LOC313253), mRNA [XM\_233016] XM\_233016  
 Rattus norvegicus similar to Cytochrome oxidase biogenesis protein OXA1, mitochondrial XM\_214182  
 Rattus norvegicus similar to G21 protein (LOC363138), mRNA [XM\_343475] XM\_343475



Unknown  
 UI-R-DY0-ckr-h-02-0-UI.s1 UI-R-DY0 Rattus norvegicus cDNA clone UI-R-DY0-ckr- BM384310  
 Rattus norvegicus similar to 40S ribosomal protein SA (P40) (34/67 kDa laminin rec XM\_345657  
 ESTs AA899907  
 Rattus norvegicus cytokine receptor-like protein CYRL (Cyr1), mRNA [NM\_139260] NM\_139260  
 carboxylesterase 1 AB023630  
 Unknown  
 Rattus norvegicus rhotekin (Rtkn), mRNA [NM\_184046] NM\_184046  
 CSS2\_MOUSE (Q9D7J7) Calpain, small subunit 2 (CSS2) (Calcium-dependent protease small subuni  
 ESTs, Highly similar to 60S RIBOSOMAL PROTEIN L18A [R.norvegicus] AA799899  
 Unknown  
 ESTs BF551067  
 ESTs BE106964  
 Unknown  
 Neuroblastoma, suppression of tumorigenicity 1 (DNA segment human D1S1733E) NM\_031609  
 ESTs AI556689  
 UI-R-BS1-azu-g-08-0-UI.s1 UI-R-BS1 Rattus norvegicus cDNA clone UI-R-BS1-azu BE111939  
 ESTs AA998304  
 ESTs, Weakly similar to HG17 RAT NONHISTONE CHROMOSOMAL PROTEIN HIBE121400  
 Rattus norvegicus protease, serine, 23 (Prss23), mRNA [NM\_001007691] NM\_001007691  
 Rattus norvegicus similar to 60S RIBOSOMAL PROTEIN L13 (LOC294344), mRNA XM\_228088  
 Rattus norvegicus similar to RIKEN cDNA 2310033P09 (LOC303180), mRNA [XM\_ XM\_220532  
 ESTs, Weakly similar to HCD2 RAT 3-HYDROXYACYL-COA DEHYDROGENASE BF523076  
 ESTs AI555659  
 Rattus norvegicus high mobility group nucleosomal binding domain 3 (Hmgn3), mRNA NM\_001007020  
 ESTs, Moderately similar to T42646 hypothetical protein DKFZp727K171.1 [H.sapie AW142434  
 Unknown  
 ESTs AA818807  
 Rattus norvegicus similar to RIKEN cDNA 6330575P11 (MGC105734), mRNA [NM\_ NM\_001009688  
 ESTs AA944253  
 ESTs AW143482  
 ESTs, Moderately similar to JC5707 HYA22 protein [H.sapiens] BE112261  
 presenilin-2 NM\_031087  
 Rattus norvegicus similar to RIKEN cDNA 0610025G21 (LOC305156), mRNA [XM\_ XM\_223168  
 DRA06H07 Rat DRG Library Rattus norvegicus cDNA clone DRA06H07 5', mRNA :BG663001  
 Rattus norvegicus cDNA clone MGC:94603 IMAGE:7190634, complete cds. [BC08: BC083712  
 ESTs AW535419  
 glutathione S-transferase, theta 2 AA998545  
 Rattus norvegicus LOC362128 (LOC362128), mRNA [XM\_347029] XM\_347029  
 ESTs AI137045  
 Rattus norvegicus similar to ribosomal protein S15 (LOC290226), mRNA [XM\_2241 XM\_224191  
 mitogen-activated protein kinase 8 interacting protein 1 NM\_053777  
 ATPase, Na+K+ transporting, beta polypeptide 3 NM\_012913  
 Rattus norvegicus similar to i-45 protein (49.8 kD) (4H318) (LOC315741), mRNA [X XM\_236314  
 ESTs AI233903  
 Rattus norvegicus mitochondrial acyl-CoA thioesterase 1 (Mte1), mRNA [NM\_1389 NM\_138907  
 Unknown  
 MEGF1 NM\_022954  
 Rattus norvegicus 2,4-dienoyl CoA reductase 1, mitochondrial (Decr1), mRNA. NM\_057197  
 Rattus norvegicus SCIRP10-related protein (SCIRP10), mRNA [NM\_001002851] NM\_001002851  
 Unknown

unknown function BM387470  
 ESTs AW915270  
 ESTs, Weakly similar to T21641 hypothetical protein F32B6.2 - *Caenorhabditis elegans* AI105272  
*Rattus norvegicus* similar to 3-phosphoglycerate dehydrogenase (LOC292672), mRNA XM\_218396  
 Unknown  
 Rat alpha-propionyl-CoA carboxylase mRNA, complete cds. M22631.1  
 xylosyltransferase 2 NM\_022296  
*Rattus norvegicus* glutathione S-transferase, mitochondrial (GST13-13), mRNA [NM\_181371  
*Rattus norvegicus* similar to hypothetical protein dJ465N24.2.1 (LOC362626), mRNA XM\_342944  
 NG,NG dimethylarginine dimethylaminohydrolase AA945152  
 dopa/tyrosine sulfotransferase NM\_022513  
 ESTs AW916521  
 UI-R-FS0-cqp-n-14-0-UI.s1 UI-R-FS0 *Rattus norvegicus* cDNA clone UI-R-FS0-cqp CA509211  
 BQ196649 UI-R-EA0-ckx-i-19-0-UI.s1 UI-R-EA0 *Rattus norvegicus* cDNA clone UI-R-EA0 BQ196649  
 ESTs AW143084  
 ESTs AW921139  
 Unknown  
 ESTs AI029975  
*Rattus norvegicus* similar to methylcrotonoyl-Coenzyme A carboxylase 2 (beta); *norvegicus* XM\_342181  
 Cystathionine beta synthase NM\_012522  
*Rattus norvegicus* similar to RIKEN cDNA 4933431D05 (LOC367393), mRNA [XM\_346124  
 regulator of differentiation (in *S. pombe*) 1 NM\_031346  
 CB544944 AMGNNUC:NRDG1-00121-E1-A nrdg1 (10855) *Rattus norvegicus* cDNA clone CB544944  
 UDP-glucose dehydrogenase NM\_031325  
 ribosomal protein S15 NM\_017151  
 Unknown  
 ESTs AI575272  
*Rattus norvegicus* FXYD domain-containing ion transport regulator 3 (Fxyd3), mRNA NM\_172317  
 ESTs AI511408  
 ESTs, Moderately similar to TISB RAT TIS11B PROTEIN [*R. norvegicus*] BF418884  
*Rattus norvegicus* similar to hypothetical protein FLJ20531 (LOC303164), mRNA [XM\_220455  
*Rattus norvegicus* similar to protein kinase BRPK (LOC298575), mRNA [XM\_216565  
 ESTs BF556273  
*Rattus norvegicus* UDP glycosyltransferase 1 family, polypeptide A8 (Ugt1a8), mRNA NM\_175846  
 UI-R-CN1-clv-o-06-0-UI.s1 UI-R-CN1 *Rattus norvegicus* cDNA clone UI-R-CN1-clv BM385375  
 ESTs AI176346  
*Rattus norvegicus* A kinase (PRKA) anchor protein (yotiao) (Akap9), mRNA [XM\_347223  
*Rattus norvegicus* similar to protein tyrosine kinase Bmx (LOC367786), mRNA [XM\_346302  
 glucocorticoid-induced leucine zipper AI029054  
 Histone H1-0 NM\_012578  
 ESTs, Weakly similar to JC5884 thyroid hormone sulfotransferase (EC 2.8.2.-) B1 - AW917557  
 Unknown  
 ESTs AW917747  
 platelet-activating factor acetylhydrolase, isoform 1b, alpha1 subunit NM\_053654  
*Rattus norvegicus* similar to embryonal Fyn-associated substrate (LOC290212), mRNA XM\_237944  
 ESTs AW917472  
 ESTs AW915764  
 similar to Protein:NP\_084044 RIKEN cDNA 2010315L10 [*Mus musculus*]. score=2.1 BU758445  
*Rattus norvegicus* similar to KIAA1803 protein (LOC313176), mRNA [XM\_232936] XM\_232936  
 mitochondrial intermediate peptidase NM\_031052  
 ESTs, Weakly similar to ENOYL-COA HYDRATASE, MITOCHONDRIAL PRECURSOR AI104482

|                                                                                          |              |
|------------------------------------------------------------------------------------------|--------------|
| ESTs, Highly similar to BRD1_HUMAN BROMODOMAIN-CONTAINING PROTEIN                        | AW525127     |
| ESTs                                                                                     | BF289377     |
| Unknown                                                                                  |              |
| ESTs                                                                                     | BI296905     |
| Rattus norvegicus similar to BBC1 (LOC365983), mRNA [XM_345317]                          | XM_345317    |
| Rattus sp. S100 alpha mRNA, partial cds.                                                 | S68809.1     |
| ESTs                                                                                     | AI231814     |
| peptidyl arginine deiminase, type I                                                      | NM_019332    |
| Rattus norvegicus similar to AT motif-binding factor (LOC307829), mRNA [XM_226.XM_226464 | XM_226464    |
| similar to Translation of nuc:A81395_1 Sequence 25 from Patent WO9909147; un             | CB544664     |
| ESTs                                                                                     | AI578861     |
| ESTs                                                                                     | BF556841     |
| Unknown                                                                                  |              |
| hydroxysteroid dehydrogenase-6, delta<5>-3-beta                                          | NM_017265    |
| Rattus norvegicus LOC363240 (LOC363240), mRNA [XM_347115]                                | XM_347115    |
| Eukaryotic elongation factor 2 kinase                                                    | NM_012947    |
| EST455240 Rat Gene Index, normalized rat, Rattus norvegicus cDNA Rattus norve            | BF290649     |
| Unknown                                                                                  |              |
| aldehyde dehydrogenase 2, mitochondrial                                                  | NM_032416    |
| ESTs                                                                                     | AA998800     |
| ESTs                                                                                     | AI171992     |
| Rattus norvegicus similar to RIKEN cDNA 5730509K17 gene (LOC289704), mRNA                | XM_237924    |
| ESTs                                                                                     | AI228265     |
| Q8NH31 (Q8NH31) Seven transmembrane helix receptor, partial (8%) [TC467254]              |              |
| Kruppel-like factor 5 (intestinal)                                                       | NM_053394    |
| Unknown                                                                                  |              |
| Rattus norvegicus alpha-N-acetylglucosaminidase (Naglu), mRNA [NM_001006954              | NM_001006954 |
| Rattus norvegicus hydroxylacyl-Coenzyme A dehydrogenase (Hadh), mRNA.                    | NM_057186    |
| ESTs, Highly similar to T09123 hybrid receptor SorLA precursor - mouse [M.muscul         | AW144823     |
| Rattus norvegicus similar to Liver carboxylesterase 1 precursor (Carboxyesterase         | EXM_346120   |
| Rattus norvegicus similar to 60S RIBOSOMAL PROTEIN L13 (LOC367796), mRNA                 | XM_346306    |
| Unknown                                                                                  |              |
| solute carrier family 2 (facilitated glucose transporter), member 4                      | NM_012751    |
| Unknown                                                                                  |              |
| Rattus norvegicus similar to hypothetical protein MGC45594 (LOC291403), mRNA             | XM_214526    |
| UI-R-BS1-azu-g-08-0-UI.s1 UI-R-BS1 Rattus norvegicus cDNA clone UI-R-BS1-azu             | BE111939     |
| unknown function                                                                         | CB547605     |
| ESTs, Highly similar to 60S ACIDIC RIBOSOMAL PROTEIN P1 [R.norvegicus]                   | BF394986     |
| ESTs                                                                                     | BF287585     |
| Rattus norvegicus similar to cell division cycle associated 3; gene rich cluster, C8 g   | XM_237105    |
| ESTs                                                                                     | H32349       |
| ESTs, Moderately similar to TSP4 RAT THROMBOSPONDIN 4 PRECURSOR [R.n                     | AW525918     |
| BM986338 EST531246 Rat gene index, normalized rat, norvegicus Rattus norvegic            | BM986338     |
| stimulated by retinoic acid 14                                                           | NM_053328    |
| Rattus norvegicus similar to High mobility group protein 1 (HMG-1) (Amphoterin) (H       | XM_345185    |
| ESTs                                                                                     | BF286205     |
| Cytochrome P450, subfamily IIF, polypeptide 1                                            | NM_019303    |
| Rattus norvegicus type I keratin KA15 (Ka15), mRNA [NM_001004022]                        | NM_001004022 |
| Nuclear Factor IA                                                                        | NM_012988    |
| Rattus norvegicus similar to tripartite motif-containing 45 (LOC295323), mRNA [XM        | XM_215666    |
| ESTs                                                                                     | AW920530     |

Rattus norvegicus excision repair cross-complementing rodent repair deficiency,cor XM\_217387  
 Rattus norvegicus AHNAK-related protein mRNA, partial cds. [AF454371] AF454371  
 Isocitrate dehydrogenase 1, soluble NM\_031510  
 branched chain aminotransferase 2, mitochondrial NM\_022400  
 ESTs, Highly similar to RNA binding motif protein 5 [H.sapiens] AI043579  
 glutathione S-transferase, mu type 3 (Yb3) NM\_031154  
 ESTs, Weakly similar to T12543 hypothetical protein DKFZp434M154.1 [H.sapiens] BF282266  
 ESTs AI179380  
 UI-R-FF0-cpa-d-08-0-UI.s1 UI-R-FF0 Rattus norvegicus cDNA clone UI-R-FF0-cpa- BU759225  
 alcohol dehydrogenase family 3, subfamily A2 NM\_031731  
 Unknown  
 ESTs, Weakly similar to Q4ECKR fucose operon U protein - Escherichia coli [E.coli] AW525660  
 Rattus norvegicus similar to AI413481 protein (LOC316232), mRNA [XM\_236931] XM\_236931  
 ESTs, Weakly similar to NADE DROME PUTATIVE GLUTAMINE-DEPENDENT NA AW915442  
 Rattus norvegicus similar to retinal short-chain dehydrogenase/reductase (LOC3131 XM\_233642  
 ESTs AW916026  
 Rattus norvegicus similar to acetyl-coA dehydrogenase -related (111.6 kD) (5G231) XM\_222190  
 Unknown  
 Q8NI74 (Q8NI74) OK/SW-CL.33 (Fragment), partial (12%) [TC497589]  
 ESTs, Weakly similar to TD53\_MOUSE TUMOR PROTEIN D53 (MD53) (D52-LIKE BF405177  
 ESTs BF563670  
 Rattus norvegicus similar to hypothetical protein FLJ90440 (LOC299830), mRNA [X XM\_216905  
 Rattus norvegicus similar to High mobility group protein 1 (HMG-1) (Amphoterin) (H XM\_344684  
 Rattus norvegicus similar to ribosomal protein L5 (LOC290469), mRNA [XM\_22448 XM\_224484  
 ESTs AI177099  
 ESTs AA943125  
 Unknown  
 Rattus norvegicus chromosome 20, major histocompatibility complex, assembled fr BX883047  
 ESTs, Highly similar to 60S RIBOSOMAL PROTEIN L8 [R.norvegicus] BI302453  
 Rattus norvegicus proline-rich proteoglycan 2 (Prpg2), mRNA [NM\_172065] NM\_172065  
 3-phosphoglycerate dehydrogenase NM\_031620  
 Unknown  
 Unknown  
 Rattus norvegicus hypothetical LOC291900 (LOC291900), mRNA [XM\_238040] XM\_238040  
 ESTs, Highly similar to PROTEASOME SUBUNIT RC6-1 [R.norvegicus] AA997406  
 ESTs BG372372  
 Unknown  
 UI-R-DY1-coi-g-14-0-UI.s1 UI-R-DY1 Rattus norvegicus cDNA clone UI-R-DY1-coi- BQ210430  
 Rattus norvegicus similar to proliferation associated SNF2-like protein (LOC294071 XM\_220062  
 Rattus norvegicus cyclic nucleotide phosphodiesterase 1 (Cnp1), mRNA [XM\_3409 XM\_340904  
 ESTs, Moderately similar to T14738 hypothetical protein DKFZp564A2416.1 [H.sap BE113609  
 liver glycogen phosphorylase NM\_022268  
 PAM COOH-terminal interactor protein 1 NM\_022959  
 AAN87340 (AAN87340) Vascular endothelial growth factor, partial (9%) [TC480823]  
 ESTs AW527535  
 transformation related protein 63 NM\_019221  
 Q60501 (Q60501) Hamster p7 preinsertion DNA, partial (8%) [TC470516]  
 ESTs AI104857  
 Rattus norvegicus similar to unnamed secretory protein (LOC360553), mRNA [XM\_ XM\_340832  
 Rattus norvegicus similar to c439A6.1 (novel protein similar to heparan sulfate (gluc XM\_220226  
 UI-R-BS0-ant-g-10-0-UI.r1 UI-R-BS0 Rattus norvegicus cDNA clone UI-R-BS0-ant- BF562538

Rattus norvegicus ectonucleoside triphosphate diphosphohydrolase 5 (Entpd5), mRN NM\_199394  
 Rattus norvegicus glioma tumor suppressor candidate region gene 2 (LOC292624), NM\_207591  
 PIUS PROTEIN. [Source:RefSeq;Acc:NM\_021660] [ENSRNOT00000030288]  
 ESTs, Weakly similar to T19332 hypothetical protein C16C10.11 - Caenorhabditis e AA819702  
 ESTs AW921412  
 Unknown  
 ESTs AI101158  
 ESTs AW142608  
 ribosomal protein L13 BG374422  
 Rattus norvegicus solute carrier family 1, member 3 (Slc1a3), mRNA. NM\_019225  
 endothelin-converting enzyme 1 NM\_053596  
 UDP-N-acetylglucosamine-2-epimerase/N-acetylmannosamine kinase NM\_053765  
 Rattus norvegicus similar to hypothetical protein FKSG28 (LOC293997), mRNA [X NM\_215264  
 Brain derived neurothrophic factor NM\_012513  
 ESTs AW917518  
 Rattus norvegicus inositol (myo)-1(or 4)-monophosphatase 2 (Impa2), mRNA [NM\_ NM\_172224  
 7-dehydrocholesterol reductase NM\_022389  
 Unknown  
 Isovaleryl Coenzyme A dehydrogenase NM\_012592  
 Rattus norvegicus acetyl-Coenzyme A acyltransferase 2 (mitochondrial 3-oxoacyl-C NM\_130433  
 glutathione S-transferase Yc2 subunit [rats, fetal liver, mRNA, 1129 nt]. S72506  
 Q94ZI5 (Q94ZI5) Orf256, partial (5%) [TC474255]  
 Rattus norvegicus RSB-11-77 protein (RSB-11-77), mRNA [NM\_182669] NM\_182669  
 Rattus norvegicus similar to mKIAA3002 protein (LOC310749), mRNA [XM\_227540] XM\_227540  
 Unknown  
 synaptojanin II NM\_032071  
 Achaete-scute homolog 2 NM\_031503  
 Benzodiazepin receptor (peripheral) NM\_012515  
 ESTs AI070096  
 Rattus norvegicus sterol regulatory element binding factor 1 (Srebf1), mRNA [XM\_2 XM\_213329  
 flavin-containing monooxygenase 3 NM\_053433  
 Rattus norvegicus similar to hypothetical protein FLJ90193 (LOC287450), mRNA [X XM\_213334  
 Rattus norvegicus carboxylesterase 3 (Ces3), mRNA. NM\_133295  
 AF030694 O1 {Plasmodium falciparum;} , partial (4%) [TC479765]  
 ESTs AW144075  
 Rattus norvegicus similar to mSin3A (LOC363067), mRNA [XM\_343395] XM\_343395  
 Rattus norvegicus creatine kinase, mitochondrial 1, ubiquitous (Ckmt1), mRNA [XM XM\_342505  
 Rattus norvegicus similar to ATP-binding cassette transporter ABCA3 (LOC302973) XM\_220219  
 ESTs, Weakly similar to S36126 neural cell adhesion molecule L1 - rat [R.norvegici BF524215  
 Rattus norvegicus similar to palladin; CGI-151 protein (LOC290704), mRNA [XM\_2 XM\_214338  
 Rattus norvegicus G protein-coupled receptor 48 (Gpr48), mRNA. NM\_173328  
 UI-R-A1-ej-h-07-0-UI.r1 UI-R-A1 Rattus norvegicus cDNA clone UI-R-A1-ej-h-07-0- BF521617  
 Rat (clone RAHB2 9/15) hox1.4 protein (hox1.4) mRNA, 3 end. L03557.1  
 ESTs AW914810  
 ESTs BG667897  
 O97336 (O97336) PFC0085c, MAL3P8.15 protein, partial (5%) [TC494881]  
 dodecenoyl-Coenzyme A delta isomerase (3,2 trans-enoyl-Coenzyme A isomerase) NM\_017306  
 Rattus norvegicus Mss4 protein (Mss4), mRNA [NM\_001007678] NM\_001007678  
 Rattus norvegicus similar to MLLT6 (LOC303504), mRNA [XM\_239329] XM\_239329  
 ESTs AI071174  
 ESTs AI171249

|                                                                                                  |              |
|--------------------------------------------------------------------------------------------------|--------------|
| glutathione S-transferase, theta 2                                                               | NM_012796    |
| ESTs                                                                                             | H33079       |
| ESTs                                                                                             | AW143339     |
| Rattus norvegicus Mss4 protein (Mss4), mRNA [NM_001007678]                                       | NM_001007678 |
| Unknown                                                                                          |              |
| Unknown                                                                                          |              |
| selective LIM binding factor, rat homolog                                                        | NM_053792    |
| Q7TQ12 (Q7TQ12) Aa1114, partial (10%) [TC462243]                                                 |              |
| Unknown                                                                                          |              |
| Rattus norvegicus similar to RIKEN cDNA 4933431D05 (LOC302278), mRNA [XM_XM_217557]              |              |
| ESTs                                                                                             | AW141699     |
| Rattus norvegicus similar to RIKEN cDNA 1300017J02 (LOC315963), mRNA [XM_XM_236574]              |              |
| Rattus norvegicus nuclear factor I/X (Nfix), mRNA [XM_213849]                                    | XM_213849    |
| CIRP_MOUSE Cold-inducible RNA-binding protein (Glycine-rich RNA-binding protein CIRP) (A18 hnR1) |              |
| aldehyde oxidase (female form)                                                                   | NM_019363    |
| B38128 epithelin/granulin precursor - rat {Rattus norvegicus;}, partial (3%) [TC486331]          |              |
| ESTs                                                                                             | BF398469     |
| glutamate-cysteine ligase , modifier subunit                                                     | NM_017305    |
| ESTs                                                                                             | AW920789     |
| Rattus norvegicus upregulated by 1,25-dihydroxyvitamin D-3 (Txnip), mRNA [NM_001008767]          |              |
| glycoprotein 330                                                                                 | NM_030827    |
| Rattus norvegicus chromobox homolog 7 (Cbx7), mRNA [NM_199117]                                   | NM_199117    |
| Shultzomica04995 Rat lung airway and parenchyma cDNA libraries Rattus norvegicus CF111744        |              |
| Q98IY2 (Q98IY2) Probable transcriptional regulator, partial (5%) [TC491167]                      |              |
| mitogen-activated protein kinase kinase 6                                                        | NM_053703    |
| Rattus norvegicus similar to latent transforming growth factor-beta binding protein 4            | XM_238093    |
| Unknown                                                                                          |              |
| ESTs, Weakly similar to T03454 ALR protein [H.sapiens]                                           | BF566516     |
| Unknown                                                                                          |              |
| Epithelial membrane protein 1                                                                    | NM_012843    |
| Rattus norvegicus similar to hypothetical protein MGC37887 (LOC287722), mRNA [XM_213459]         |              |
| ESTs                                                                                             | AI176773     |
| Unknown                                                                                          |              |
| Unknown                                                                                          |              |
| Rattus norvegicus angiopoietin 1 (Angpt1), mRNA [NM_053546]                                      | NM_053546    |
| ESTs, Moderately similar to PBEF_HUMAN PRE-B CELL ENHANCING FACTOR F                             | BF523891     |
| Rattus norvegicus aldo-keto reductase family 7, member A2 (aflatoxin aldehyde red                | NM_134407    |
| Rattus norvegicus similar to hypothetical protein FLJ36175 (LOC362137), mRNA [XM_342437]         |              |
| ESTs                                                                                             | BF567204     |
| ESTs                                                                                             | AA925520     |
| ESTs                                                                                             | BF551311     |
| 2',3'- Cyclic nucleotide 3'-phosphodiesterase                                                    | AI412542     |
| ESTs                                                                                             | BF523202     |
| Rattus norvegicus hypothetical LOC289904 (LOC289904), mRNA [XM_214130]                           | XM_214130    |
| similar to Mouse mRNA for Death-associated protein kinase 2, complete cds.                       | BQ211425     |
| ESTs                                                                                             | AW917383     |
| ornithine aminotransferase                                                                       | NM_022521    |
| Rattus norvegicus similar to RIKEN cDNA 4933431D05 (LOC363398), mRNA [XM_XM_343728]              |              |
| similar to GCGPROT:TR17_MOUSE Tumor necrosis factor receptor superfamily member 1                | BQ193647     |
| Rattus norvegicus peroxisomal trans-2-enoyl-CoA reductase (Pecr), mRNA [NM_133299]               | NM_133299    |
| glucocorticoid-induced leucine zipper                                                            | NM_031345    |

Rattus norvegicus KIAA1454-like protein (Znf291), mRNA [XM\_343394] XM\_343394  
 Rattus norvegicus SHARP-2 gene for enhancer of split- and hairy-related protein-2, AB096137  
 similar to Protein:NP\_071710 secreted modular calcium-binding protein 2 [Mus mus BQ209870  
 Rattus norvegicus similar to HMG-1 (LOC367884), mRNA [XM\_346340] XM\_346340  
 Coagulation factor III (thromboplastin, tissue factor) NM\_013057  
 Rattus norvegicus acetyl-Coenzyme A acyltransferase 2 (mitochondrial 3-oxoacyl-C NM\_130433  
 Rattus norvegicus similar to phospholysine phosphohistidine inorganic pyrophosphatase NM\_001009706  
 Unknown  
 ESTs AA957779  
 Rattus norvegicus similar to sciellin (LOC361086), mRNA [XM\_341370] XM\_341370  
 Rattus norvegicus similar to NADP<sup>+</sup>-specific isocitrate dehydrogenase (LOC293043) XM\_214977  
 Rattus norvegicus similar to copine III (LOC313087), mRNA [XM\_232809] XM\_232809  
 Rattus norvegicus carbonic anhydrase-related XI protein mRNA, complete cds. [AY AY075025  
 potassium voltage-gated channel, subfamily H (eag-related), member 1 NM\_031742  
 Unknown BC086534  
 Unknown  
 Rattus norvegicus apoptosis-associated speck-like protein containing a CARD (Pyc NM\_172322  
 Glutathione-S-transferase, alpha type (Yc?) NM\_017013  
 Rattus norvegicus similar to chromaffin granule ATPase II homolog (LOC360935), r XM\_341212  
 Kruppel-like factor 15 (kidney) NM\_053536  
 Unknown  
 Q8BZ40 (Q8BZ40) Alanyl-tRNA synthetase, partial (12%) [TC470769]  
 similar to Protein:NP\_032085 G0/G1 switch gene 2 [Mus musculus]. score=6.401e- CA507680  
 FXFD domain-containing ion transport regulator 3 AI009597  
 ESTs, Weakly similar to I52196 homeobox transcription factor Hox 1.11 - rat [R.nor BE113200  
 Shultzomica04470 Rat lung airway and parenchyma cDNA libraries Rattus norvegicus CF111219  
 unknown function BM384026  
 Rattus norvegicus similar to coiled-coil like protein 1 (LOC361622), mRNA [XM\_341XM\_341900  
 Q9F5B2 (Q9F5B2) Rorf140 protein, partial (5%) [TC474477]  
 Rattus norvegicus H19 fetal liver mRNA (H19), mRNA [XM\_219494] XM\_219494  
 Rattus norvegicus similar to aldo-keto reductase family 1, member C12; aldo-keto reductase XM\_225544  
 aflatoxin B1 aldehyde reductase NM\_013215  
 UI-R-FS1-cqi-n-16-0-UI.s1 UI-R-FS1 Rattus norvegicus cDNA clone UI-R-FS1-cqi-r BU760453  
 Rattus norvegicus similar to hypothetical protein MGC15606 (LOC304353), mRNA [XM\_221996  
 BQ205131 UI-R-DZ1-cnh-f-09-0-UI.s1 NCI\_CGAP\_DZ1 Rattus norvegicus cDNA clone BQ205131  
 Rattus norvegicus apolipoprotein E (ApoE), mRNA [NM\_138828] NM\_138828  
 aldehyde dehydrogenase family 1, subfamily A4 NM\_017272  
 Rattus norvegicus similar to RIKEN cDNA 4933431D05 (LOC363338), mRNA [XM\_343676  
 ESTs AI409042  
 Unknown  
 Rattus norvegicus similar to hypothetical protein FLJ32096 (LOC298668), mRNA [XM\_216592  
 Rattus norvegicus LOC363301 (LOC363301), mRNA [XM\_347120] XM\_347120  
 Unknown  
 unknown function BQ207374  
 Rattus norvegicus AHNAK-related protein mRNA, partial cds. [AF454372] AF454372  
 ESTs, Weakly similar to MIPP MOUSE MIPP PROTEIN [M.musculus] AW916023  
 Rattus norvegicus similar to RIKEN cDNA 1700081O22 (LOC363366), mRNA [XM\_343700  
 Rattus norvegicus clone UI-R-FJ0-cpz-g-01-0-UI unknown mRNA. [AY724524] AY724524  
 Rattus norvegicus similar to RIKEN cDNA 1700081O22 (LOC363354), mRNA [XM\_343690  
 Rattus norvegicus LRP16 protein (Lrp16), mRNA [NM\_139337] NM\_139337  
 ESTs, Highly similar to EYA2 MOUSE EYES ABSENT HOMOLOG 2 [M.musculus] AW918854

|                                                                                              |           |
|----------------------------------------------------------------------------------------------|-----------|
| Glutathione-S-transferase, alpha type (Ya)                                                   | NM_031509 |
| Unknown                                                                                      |           |
| Unknown                                                                                      |           |
| ESTs                                                                                         | BG670434  |
| ESTs                                                                                         | BF413197  |
| Rattus norvegicus inositol 1,4,5-triphosphate receptor 1 (Itp1), mRNA [NM_001007NM_001007235 |           |
| Unknown                                                                                      |           |
| Unknown                                                                                      |           |
| Rattus norvegicus esterase 2 (Es2), mRNA [NM_017004]                                         | NM_017004 |
| ESTs                                                                                         | BF551869  |
| Rattus norvegicus similar to RIKEN cDNA 4933431D05 (LOC367529), mRNA [XM_XM_346199           |           |
| Rattus norvegicus similar to peptidylglycine alpha-amidating monooxygenase COO               | XM_218995 |
| Pleiotrophin (Heparine binding factor, Hbnf, in the mouse)                                   | AI102795  |
| Rattus norvegicus similar to RIKEN cDNA 4933431D05 (LOC317020), mRNA [XM_XM_229650           |           |
| Eukaryotic elongation factor 2 kinase                                                        | NM_012947 |
| MEGF6                                                                                        | NM_022955 |
| Rattus norvegicus chemokine (C-X3-C motif) ligand 1 (Cx3cl1), mRNA [NM_134455                | NM_134455 |
| cysteine-sulfinate decarboxylase                                                             | NM_021750 |
| Rattus norvegicus similar to RIKEN cDNA 1700081O22 (LOC367059), mRNA [XM_XM_345920           |           |
| Unknown                                                                                      |           |
| Rattus norvegicus similar to RIKEN cDNA 4933431D05 (LOC312016), mRNA [XM_XM_231341           |           |
| Rattus norvegicus similar to RIKEN cDNA 4933431D05 (LOC367368), mRNA [XM_XM_346107           |           |
| Rattus norvegicus similar to RIKEN cDNA 1700081O22 (LOC307681), mRNA [XM_XM_226288           |           |
| Rattus norvegicus similar to RIKEN cDNA 4933431D05 (LOC307706), mRNA [XM_XM_226313           |           |
| Rattus norvegicus similar to GLUTATHIONE S-TRANSFERASE 8 (GST 8-8) (CHAI                     | XM_234810 |
| Rattus norvegicus similar to hypothetical protein 4831428F09 (LOC289193), mRNA               | XM_222849 |
| Lost on transformation 1                                                                     | AA900750  |
| Unknown                                                                                      | BC087040  |
| Rattus norvegicus similar to RIKEN cDNA 4933431D05 (LOC367529), mRNA [XM_XM_346199           |           |
| steroid sensitive gene-1 protein                                                             | AF223677  |
| endothelin-converting enzyme 1                                                               | NM_053596 |
| Rattus norvegicus similar to RIKEN cDNA 1700081O22 (LOC367494), mRNA [XM_XM_346168           |           |
| EPO_MACFA Erythropoietin precursor. {Macaca fascicularis;}, partial (8%) [TC495125]          |           |
| Rattus norvegicus similar to RIKEN cDNA 1700081O22 (LOC361372), mRNA [XM_XM_341649           |           |
| Rattus norvegicus actinin alpha 3 (Actn3), mRNA.                                             | NM_133424 |
| Rattus norvegicus LOC363349 (LOC363349), mRNA [XM_347128]                                    | XM_347128 |
| Unknown                                                                                      |           |
| Rattus norvegicus similar to 2-amino-3-ketobutyrate-coenzyme A ligase (LOC36695              | XM_345856 |
| Unknown                                                                                      |           |
| AF157508 immunoglobulin-associated J chain {Rana catesbeiana;}, partial (8%) [TC482085]      |           |
| Rattus norvegicus similar to RIKEN cDNA 4933431D05 (LOC367673), mRNA [XM_XM_346249           |           |
| ESTs                                                                                         | AI409900  |
| R.rattus mRNA for glutathione transferase subunit 8.                                         | X62660.1  |
| Rattus norvegicus similar to RIKEN cDNA 1700081O22 (LOC291888), mRNA [XM_XM_214644           |           |
| Rattus norvegicus similar to acetyl-CoA synthetase 2 (LOC296259), mRNA [XM_21XM_215897       |           |
| Unknown                                                                                      |           |
| Unknown                                                                                      |           |
| Pleiotrophin (Heparine binding factor, Hbnf, in the mouse)                                   | AI071874  |
| Rattus norvegicus similar to RIKEN cDNA 4933431D05 (LOC296780), mRNA [XM_XM_216073           |           |
| ESTs, Weakly similar to S105 MOUSE S100 CALCIUM-BINDING PROTEIN A5 [R. AW141940              |           |
| Rattus norvegicus similar to RIKEN cDNA 4933431D05 (LOC367511), mRNA [XM_XM_346182           |           |



Aldehyde dehydrogenase 1, subfamily A1 NM\_022407  
 Glutathione-S-transferase, alpha type (Yc?) NM\_017013  
 Rattus norvegicus similar to RIKEN cDNA 4933431D05 (LOC316919), mRNA [XM\_XM\_229488  
 Rattus norvegicus similar to RIKEN cDNA 4933431D05 (LOC302083), mRNA [XM\_XM\_229656  
 Rattus norvegicus similar to RIKEN cDNA 1700081O22 (LOC363370), mRNA [XM\_XM\_343705  
 Rattus norvegicus similar to RIKEN cDNA 4933431D05 (LOC363360), mRNA [XM\_XM\_343695  
 Rattus norvegicus similar to RIKEN cDNA 6430573B13 (LOC362648), mRNA [XM\_XM\_342965  
 ESTs, Moderately similar to GST3\_HUMAN MICROSOMAL GLUTATHIONE S-TR/ BF282898  
 Rattus norvegicus similar to RIKEN cDNA 1700081O22 (LOC367513), mRNA [XM\_XM\_346184  
 Rattus norvegicus inositol 1,4,5-triphosphate receptor 1 (Itp1), mRNA [NM\_001007 NM\_001007235  
 Rattus norvegicus similar to RIKEN cDNA 1700081O22 (LOC312002), mRNA [XM\_XM\_231326  
 Rattus norvegicus similar to RIKEN cDNA 4933431D05 (LOC316920), mRNA [XM\_XM\_229489  
 Rattus norvegicus alcohol dehydrogenase 7 (class IV), mu or sigma polypeptide (Ac NM\_134329  
 Rattus norvegicus similar to RIKEN cDNA 4933431D05 (LOC301978), mRNA [XM\_XM\_217512  
 Rattus norvegicus similar to RIKEN cDNA 4933431D05 (LOC363305), mRNA [XM\_XM\_343646  
 Rattus norvegicus similar to RIKEN cDNA 1700081O22 (LOC363422), mRNA [XM\_XM\_343745  
 Rattus norvegicus similar to RIKEN cDNA 4933431D05 (LOC363351), mRNA [XM\_XM\_343687  
 Rattus norvegicus similar to RIKEN cDNA 4933431D05 (LOC363371), mRNA [XM\_XM\_343706  
 Rattus norvegicus similar to GLUTATHIONE S-TRANSFERASE 8 (GST 8-8) (CHAI XM\_345684  
 Rattus norvegicus similar to Integrin alpha-6 precursor (VLA-6) (CD49f) (LOC36752 XM\_346197  
 Rattus norvegicus similar to RIKEN cDNA 1700081O22 (LOC363350), mRNA [XM\_XM\_343686  
 Rattus norvegicus LOC362136 (LOC362136), mRNA [XM\_342436] XM\_342436  
 Rattus norvegicus similar to RIKEN cDNA 4933431D05 (LOC363395), mRNA [XM\_XM\_343725  
 Rattus norvegicus similar to RIKEN cDNA 4933431D05 (LOC287849), mRNA [XM\_XM\_221150  
 Rattus norvegicus similar to RIKEN cDNA 4933431D05 (LOC301978), mRNA [XM\_XM\_217512  
 Rattus norvegicus similar to RIKEN cDNA 4933431D05 (LOC296777), mRNA [XM\_XM\_216071  
 Rattus norvegicus similar to RIKEN cDNA 4933431D05 (LOC363312), mRNA [XM\_XM\_343652  
 Rattus norvegicus similar to RIKEN cDNA 4933431D05 (LOC301906), mRNA [XM\_XM\_217507  
 Rattus norvegicus similar to RIKEN cDNA 4933431D05 (LOC360996), mRNA [XM\_XM\_341270  
 Rattus norvegicus similar to RIKEN cDNA 1700081O22 (LOC363374), mRNA [XM\_XM\_343709  
 Rattus norvegicus similar to RIKEN cDNA 1700081O22 (LOC363336), mRNA [XM\_XM\_343674  
 Rattus norvegicus similar to RIKEN cDNA 4933431D05 (LOC301985), mRNA [XM\_XM\_217514  
 Rattus norvegicus similar to RIKEN cDNA 1700081O22 (LOC312004), mRNA [XM\_XM\_231328  
 Rattus norvegicus similar to RIKEN cDNA 4933431D05 (LOC301986), mRNA [XM\_XM\_217515  
 Rattus norvegicus similar to RIKEN cDNA 4933431D05 (LOC316919), mRNA [XM\_XM\_229488  
 GST3\_HUMAN Microsomal glutathione S-transferase 3 (Microsomal GST-3) (Microsomal GST-III). {H  
 Aldehyde dehydrogenase class 3 NM\_031972  
 Rattus norvegicus similar to mitochondrial glycerol 3-phosphate acyltransferase (LC XM\_238283  
 Rattus norvegicus similar to microsomal glutathione S-transferase 3 (LOC289197), XM\_213943  
 Rattus norvegicus similar to RIKEN cDNA 4933431D05 (LOC363372), mRNA [XM\_XM\_343707  
 Rattus norvegicus similar to RIKEN cDNA 4933431D05 (LOC363424), mRNA [XM\_XM\_343747  
 ESTs AA893226  
 Rattus norvegicus similar to RIKEN cDNA 4933431D05 (LOC363359), mRNA [XM\_XM\_343694  
 Rattus norvegicus similar to RIKEN cDNA 1700081O22 (LOC307687), mRNA [XM\_XM\_226292  
 Rattus norvegicus similar to RIKEN cDNA 4933431D05 (LOC287855), mRNA [XM\_XM\_221162  
 ESTs BE108829  
 metallothionein 3 NM\_053968  
 small inducible cytokine subfamily A20 NM\_019233  
 Rattus norvegicus similar to RIKEN cDNA 4933431D05 (LOC296782), mRNA [XM\_XM\_216075  
 Rattus norvegicus similar to RIKEN cDNA 4933431D05 (LOC317141), mRNA [XM\_XM\_229865  
 Rattus norvegicus similar to RIKEN cDNA 4933431D05 (LOC363424), mRNA [XM\_XM\_343747

Rattus norvegicus similar to RIKEN cDNA 4933431D05 (LOC363429), mRNA [XM\_XM\_343751  
 Aldehyde dehydrogenase class 3 AI555548  
 Rattus norvegicus cytochrome P450 monooxygenase CYP2T1 (Cyp2t1), mRNA [NI NM\_134369  
 Rattus norvegicus similar to RIKEN cDNA 4933431D05 (LOC302199), mRNA [XM\_XM\_217542  
 Rattus norvegicus similar to RIKEN cDNA 1700081O22 (LOC363394), mRNA [XM\_XM\_343724  
 Rattus norvegicus LOC363343 (LOC363343), mRNA [XM\_343681] XM\_343681  
 Pleiotrophin (Heparine binding factor, Hbnf, in the mouse) AI102795  
 Rattus norvegicus similar to RIKEN cDNA 4933431D05 (LOC363345), mRNA [XM\_XM\_343682  
 Unknown  
 Rattus norvegicus similar to RIKEN cDNA 1700081O22 (LOC317091), mRNA [XM\_XM\_229800  
 Pleiotrophin (Heparine binding factor, Hbnf, in the mouse) NM\_017066  
 Rattus norvegicus LOC363348 (LOC363348), mRNA [XM\_343685] XM\_343685  
 ESTs BF551978  
 carboxylesterase 1 NM\_031565  
 Unknown  
 Rattus norvegicus selenium binding protein 2 (Selenbp1), mRNA [NM\_080892] NM\_080892  
 Rattus norvegicus similar to RIKEN cDNA 1700081O22 (LOC367677), mRNA [XM\_XM\_346251  
 ESTs AI177431  
 ESTs, Weakly similar to GLUTATHIONE S-TRANSFERASE YC-2 [R.norvegicus] BF566100  
 Rattus norvegicus olfactory receptor gene Olr1285 (Olr1285), mRNA [NM\_0010004 NM\_001000459

| Treatment P-value | Fold Change(NMBA vs Control) |
|-------------------|------------------------------|
| 1.11022E-16       | 56.09446367                  |
| 1.11022E-16       | 36.4686763                   |
| 1.11022E-16       | 32.69715755                  |
| 1.11022E-16       | 31.83097929                  |
| 3.34634E-07       | 24.30916268                  |
| 8.05603E-09       | 17.78033749                  |
| 2.10942E-15       | 15.57220097                  |
| 1.84021E-06       | 15.14363035                  |
| 0.00003           | 14.84055012                  |
| 1.11022E-16       | 13.8331154                   |
| 4.77798E-10       | 11.73194451                  |
| 1.11022E-16       | 11.71305008                  |
| 1.11022E-16       | 10.68931807                  |
| 2.54501E-06       | 10.66497889                  |
| 0.00065           | 10.41022222                  |
| 1.11022E-16       | 10.34189204                  |
| 1.11022E-16       | 10.27779616                  |
| 0.00019           | 9.189248583                  |
| 3.21811E-11       | 8.809474443                  |
| 9.83996E-07       | 8.440924194                  |
| 1.11022E-16       | 8.22867671                   |
| 0.00002           | 7.934507957                  |
| 2.00231E-08       | 7.768550621                  |
| 1.11022E-16       | 7.10476962                   |
| 1.11022E-16       | 7.061874577                  |
| 1.11022E-16       | 6.946883248                  |
| 1.11022E-16       | 6.923728029                  |
| 0.00058           | 6.906849614                  |
| 4.61853E-13       | 6.715061585                  |
| 1.11022E-16       | 6.614545375                  |
| 7.46891E-11       | 6.548623164                  |
| 1.11022E-16       | 6.34979932                   |
| 1.11022E-16       | 6.18343785                   |
| 1.11022E-16       | 6.114909023                  |
| 1.11022E-16       | 6.000259041                  |
| 1.70793E-08       | 5.720184015                  |
| 1.11022E-16       | 5.632225052                  |
| 5.36398E-10       | 5.568650993                  |
| 6.96804E-11       | 5.453056531                  |
| 1.11022E-16       | 5.415143876                  |
| 0.0001            | 5.323411029                  |
| 2.43062E-08       | 5.17606832                   |
| 3.90017E-07       | 5.060926149                  |
| 1.11022E-16       | 5.052077452                  |
| 1.11022E-16       | 4.984481633                  |
| 3.50319E-09       | 4.942651614                  |
| 1.11022E-16       | 4.908400594                  |
| 1.11022E-16       | 4.742638254                  |

|             |             |
|-------------|-------------|
| 0.0005      | 4.739908958 |
| 0.00027     | 4.712485208 |
| 8.6858E-08  | 4.662405045 |
| 6.70435E-06 | 4.660151117 |
| 2.25065E-09 | 4.641624459 |
| 1.11022E-16 | 4.61126414  |
| 4.52122E-07 | 4.580575016 |
| 3.05705E-08 | 4.498523567 |
| 1.11022E-16 | 4.353213828 |
| 1.11022E-16 | 4.233504249 |
| 7.36275E-06 | 4.195367408 |
| 1.11022E-16 | 4.152503431 |
| 1.11022E-16 | 4.117276183 |
| 0.0001      | 4.051258918 |
| 1.71343E-06 | 4.014301614 |
| 0.00087     | 4.001105473 |
| 1.11022E-16 | 3.968441659 |
| 1.11022E-16 | 3.955031984 |
| 1.11022E-16 | 3.953848278 |
| 7.16205E-13 | 3.886780364 |
| 1.68971E-09 | 3.880073924 |
| 7.67787E-06 | 3.87659115  |
| 1.11022E-16 | 3.829922624 |
| 0.00002     | 3.821553994 |
| 6.08366E-10 | 3.743260056 |
| 5.9504E-06  | 3.728378544 |
| 1.11022E-16 | 3.726232934 |
| 6.9262E-09  | 3.710137456 |
| 3.86358E-14 | 3.669695252 |
| 1.11022E-16 | 3.643090836 |
| 1.17221E-10 | 3.639820779 |
| 1.11022E-16 | 3.63471196  |
| 1.11022E-16 | 3.616512746 |
| 4.99163E-06 | 3.597244854 |
| 8.88178E-16 | 3.587319019 |
| 0.00004     | 3.575032547 |
| 2.01395E-10 | 3.543235349 |
| 6.24814E-06 | 3.540625558 |
| 4.48807E-10 | 3.535167533 |
| 2.37835E-08 | 3.508326469 |
| 0.0008      | 3.467049163 |
| 1.11022E-16 | 3.457164143 |
| 1.40332E-13 | 3.453027205 |
| 5.55112E-16 | 3.449530585 |
| 5.22044E-06 | 3.447227931 |
| 4.21989E-11 | 3.440962978 |
| 1.87238E-06 | 3.429256733 |
| 1.11022E-16 | 3.421290882 |
| 0.00003     | 3.408474114 |
| 1.11022E-16 | 3.379714383 |
| 1.11022E-16 | 3.364418404 |

|             |             |
|-------------|-------------|
| 1.11022E-16 | 3.359154662 |
| 0.00004     | 3.34772673  |
| 6.7408E-10  | 3.330964468 |
| 2.52587E-12 | 3.329967539 |
| 0.00031     | 3.317569273 |
| 1.03755E-08 | 3.308262789 |
| 5.59552E-14 | 3.304532291 |
| 1.11022E-16 | 3.287986305 |
| 8.02532E-09 | 3.284581179 |
| 2.18359E-06 | 3.279895447 |
| 1.74255E-06 | 3.277253229 |
| 1.11022E-16 | 3.252220627 |
| 1.11022E-16 | 3.242798773 |
| 1.11022E-16 | 3.237501662 |
| 1.11022E-16 | 3.22522487  |
| 0.00003     | 3.211441387 |
| 6.60583E-14 | 3.18793898  |
| 0.00024     | 3.161258427 |
| 3.58253E-09 | 3.13913505  |
| 7.21645E-15 | 3.127591326 |
| 1.11022E-16 | 3.127303277 |
| 1.11022E-16 | 3.125791458 |
| 1.11022E-16 | 3.077301156 |
| 0.0002      | 3.070930586 |
| 0.00021     | 3.061681429 |
| 1.11022E-16 | 3.059144559 |
| 1.11022E-16 | 3.041515262 |
| 1.11022E-16 | 3.013144781 |
| 0.00071     | 3.001234983 |
| 0.00015     | 2.995366718 |
| 3.4609E-06  | 2.993574012 |
| 1.11022E-16 | 2.992402439 |
| 4.21511E-07 | 2.986482677 |
| 1.11022E-16 | 2.974335811 |
| 0.00024     | 2.973240227 |
| 0.00078     | 2.970366238 |
| 3.20777E-07 | 2.968725207 |
| 7.46779E-07 | 2.966538575 |
| 0.00016     | 2.964421811 |
| 2.25607E-11 | 2.96380755  |
| 1.11022E-16 | 2.959374995 |
| 1.11022E-16 | 2.953112555 |
| 1.11022E-16 | 2.948356534 |
| 9.78995E-11 | 2.942862697 |
| 3.55271E-15 | 2.942320652 |
| 3.21965E-15 | 2.917964473 |
| 1.11022E-16 | 2.910113985 |
| 1.11022E-16 | 2.897276875 |
| 0.00013     | 2.897076745 |
| 4.77396E-15 | 2.896876629 |
| 2.9976E-15  | 2.889681649 |

|             |             |
|-------------|-------------|
| 2.5955E-11  | 2.885426393 |
| 5.55112E-16 | 2.881177403 |
| 1.11022E-16 | 2.868137713 |
| 2.38712E-08 | 2.867675461 |
| 6.17736E-06 | 2.859894417 |
| 1.11022E-16 | 2.85377678  |
| 0.00077     | 2.853579655 |
| 1.11022E-16 | 2.846557756 |
| 1.11022E-16 | 2.845312685 |
| 3.00648E-13 | 2.838180422 |
| 0.00003     | 2.832565753 |
| 0.00013     | 2.831066039 |
| 1.10325E-10 | 2.824359661 |
| 3.79751E-10 | 2.807113676 |
| 3.86631E-09 | 2.806338149 |
| 1.11022E-16 | 2.795631981 |
| 6.09391E-10 | 2.790101483 |
| 1.11022E-16 | 2.787468703 |
| 1.29896E-14 | 2.786057017 |
| 1.10423E-12 | 2.784838408 |
| 1.75258E-10 | 2.78157004  |
| 1.43846E-10 | 2.776195206 |
| 4.3692E-07  | 2.773320105 |
| 1.16607E-12 | 2.768152423 |
| 1.11022E-16 | 2.765221978 |
| 3.30691E-09 | 2.754228703 |
| 2.66454E-15 | 2.752833851 |
| 0.00003     | 2.750616222 |
| 1.11022E-16 | 2.746249558 |
| 1.94955E-13 | 2.732624766 |
| 4.3225E-08  | 2.722325179 |
| 0.00029     | 2.721573077 |
| 1.11022E-16 | 2.720633241 |
| 2.67208E-08 | 2.719380631 |
| 1.51759E-09 | 2.717377656 |
| 2.27596E-14 | 2.707197872 |
| 3.01981E-14 | 2.70545304  |
| 1.88738E-15 | 2.690481437 |
| 6.0968E-07  | 2.686581377 |
| 1.32538E-12 | 2.684788012 |
| 1.11022E-16 | 2.683490116 |
| 1.11022E-16 | 2.6826252   |
| 0.0002      | 2.670299657 |
| 1.29926E-07 | 2.65766355  |
| 1.11022E-16 | 2.653627749 |
| 5.0878E-08  | 2.651612148 |
| 1.93534E-12 | 2.64691503  |
| 1.11022E-16 | 2.643078123 |
| 1.11022E-16 | 2.642773845 |
| 4.7351E-08  | 2.61866534  |
| 1.11022E-16 | 2.615531772 |

|             |             |
|-------------|-------------|
| 8.67316E-07 | 2.614989805 |
| 1.11022E-16 | 2.613003551 |
| 8.18976E-11 | 2.611018807 |
| 0.00033     | 2.609696481 |
| 2.13337E-09 | 2.609275882 |
| 2.33968E-10 | 2.608074543 |
| 1.14233E-09 | 2.60753412  |
| 0.00007     | 2.607293969 |
| 0.00034     | 2.605493536 |
| 2.22924E-11 | 2.605073614 |
| 7.3377E-06  | 2.604773711 |
| 8.86382E-07 | 2.603694346 |
| 0.00006     | 2.600399058 |
| 1.11022E-16 | 2.589107007 |
| 1.33227E-15 | 2.582735904 |
| 7.13429E-13 | 2.581427902 |
| 0.0003      | 2.580179973 |
| 1.94178E-07 | 2.574542112 |
| 1.11022E-16 | 2.571994289 |
| 9.09892E-09 | 2.566374315 |
| 3.38866E-07 | 2.564779301 |
| 1.11022E-16 | 2.559528678 |
| 1.11022E-16 | 2.557172351 |
| 5.15878E-06 | 2.557054591 |
| 0.00012     | 2.53787367  |
| 1.03131E-08 | 2.526853131 |
| 4.44089E-15 | 2.520867389 |
| 8.61089E-06 | 2.512291332 |
| 0.00004     | 2.507956503 |
| 5.7291E-08  | 2.503744452 |
| 1.08328E-10 | 2.491035977 |
| 0.00002     | 2.487825987 |
| 0.00027     | 2.485936323 |
| 4.13732E-06 | 2.483704934 |
| 3.08136E-06 | 2.480333049 |
| 4.48468E-08 | 2.475141318 |
| 2.45525E-08 | 2.475141318 |
| 1.11022E-16 | 2.471724145 |
| 1.11022E-16 | 2.470870589 |
| 4.44089E-16 | 2.470244836 |
| 2.1327E-06  | 2.469107508 |
| 0.00053     | 2.462918268 |
| 1.11022E-16 | 2.462124445 |
| 1.11022E-16 | 2.458385581 |
| 2.15673E-08 | 2.448330259 |
| 1.11022E-16 | 2.44618895  |
| 1.79132E-10 | 2.444668632 |
| 1.11022E-16 | 2.443768148 |
| 2.23166E-12 | 2.441124896 |
| 1.32479E-07 | 2.438709107 |
| 0.00003     | 2.43326831  |

|             |             |
|-------------|-------------|
| 5.69791E-07 | 2.428119183 |
| 1.30397E-11 | 2.424934431 |
| 4.8171E-10  | 2.420583118 |
| 0.00006     | 2.417575245 |
| 2.67745E-06 | 2.414849113 |
| 6.71541E-12 | 2.41457111  |
| 1.11022E-16 | 2.410071905 |
| 1.11022E-16 | 2.406190457 |
| 0.00015     | 2.404252078 |
| 1.11022E-16 | 2.403919941 |
| 4.11585E-11 | 2.401485673 |
| 4.59271E-07 | 2.400877491 |
| 0.00003     | 2.397894105 |
| 1.44329E-15 | 2.39772847  |
| 0.00006     | 2.397618053 |
| 1.11022E-16 | 2.390892226 |
| 1.19563E-10 | 2.390286728 |
| 1.11022E-16 | 2.388306167 |
| 1.88973E-09 | 2.387811283 |
| 0.00045     | 2.387646344 |
| 1.11022E-16 | 2.386876782 |
| 0.00067     | 2.374925551 |
| 2.83537E-06 | 2.372466015 |
| 1.11022E-16 | 2.366246584 |
| 1.9984E-15  | 2.364993764 |
| 0.00008     | 2.3647215   |
| 0.00003     | 2.360641295 |
| 1.9974E-12  | 2.357762196 |
| 1.44329E-15 | 2.350444495 |
| 1.27847E-09 | 2.349037771 |
| 1.1455E-06  | 2.347685945 |
| 2.93749E-09 | 2.344714666 |
| 1.11022E-16 | 2.344228815 |
| 5.00711E-14 | 2.343851001 |
| 0.00002     | 2.341693228 |
| 4.06637E-09 | 2.341369733 |
| 3.96799E-06 | 2.339483573 |
| 1.11022E-16 | 2.339483573 |
| 0.00015     | 2.338621834 |
| 0.00054     | 2.337329821 |
| 1.0793E-06  | 2.336630278 |
| 1.71118E-06 | 2.334694176 |
| 1.11022E-16 | 2.332652254 |
| 0.00001     | 2.332222603 |
| 7.88488E-08 | 2.329485438 |
| 1.11022E-16 | 2.323485679 |
| 4.92075E-06 | 2.322736796 |
| 1.11022E-16 | 2.322683314 |
| 1.11022E-16 | 2.316541047 |
| 1.17774E-08 | 2.31366246  |
| 1.11022E-16 | 2.313342838 |



|             |             |
|-------------|-------------|
| 1.11022E-16 | 2.312863487 |
| 5.74678E-08 | 2.309457636 |
| 1.46773E-10 | 2.309404459 |
| 0.00003     | 2.306747189 |
| 5.89656E-10 | 2.304252143 |
| 0.00002     | 2.304039923 |
| 8.56624E-07 | 2.302767015 |
| 4.44089E-16 | 2.302130825 |
| 1.11022E-16 | 2.301918801 |
| 0.00041     | 2.300276274 |
| 0.00014     | 2.299905543 |
| 4.07272E-10 | 2.297894047 |
| 1.11022E-16 | 2.297100519 |
| 6.51691E-06 | 2.296783185 |
| 6.02229E-12 | 2.2967303   |
| 4.25457E-11 | 2.295408577 |
| 8.30403E-06 | 2.2948801   |
| 5.9631E-06  | 2.294774419 |
| 0.00007     | 2.289602022 |
| 0.00013     | 2.288705957 |
| 7.88731E-10 | 2.282758665 |
| 1.41179E-06 | 2.280657135 |
| 1.93323E-12 | 2.278400147 |
| 1.11022E-16 | 2.273055292 |
| 4.02493E-07 | 2.267514119 |
| 1.11022E-16 | 2.262611551 |
| 3.58248E-10 | 2.261361531 |
| 1.11022E-16 | 2.259123639 |
| 1.92126E-06 | 2.25803152  |
| 7.64299E-06 | 2.247656808 |
| 5.69714E-09 | 2.245691008 |
| 0.00034     | 2.238463411 |
| 0.0001      | 2.233160822 |
| 2.85826E-09 | 2.23213265  |
| 1.11022E-16 | 2.22874304  |
| 0.00037     | 2.227152728 |
| 6.611E-07   | 2.226024808 |
| 5.40169E-06 | 2.224590099 |
| 0.00032     | 2.222798014 |
| 0.00061     | 2.217175138 |
| 3.47616E-10 | 2.217124086 |
| 6.89315E-11 | 2.216358451 |
| 0.00003     | 2.215440037 |
| 2.56652E-06 | 2.214267063 |
| 1.11022E-16 | 2.213961172 |
| 2.14916E-07 | 2.211260968 |
| 0.00002     | 2.20917439  |
| 7.6292E-07  | 2.207953892 |
| 0.00004     | 2.205667277 |
| 0.00018     | 2.203839689 |
| 1.37481E-09 | 2.20323083  |

|             |             |
|-------------|-------------|
| 1.4112E-10  | 2.200543713 |
| 9.10494E-13 | 2.199530558 |
| 4.29317E-08 | 2.196898539 |
| 0.00013     | 2.1952804   |
| 2.17878E-09 | 2.194269669 |
| 1.11022E-16 | 2.194067579 |
| 7.59412E-07 | 2.193259403 |
| 1.11022E-16 | 2.192098172 |
| 3.81029E-13 | 2.191744876 |
| 6.07273E-08 | 2.189021363 |
| 2.21828E-06 | 2.188870156 |
| 3.95959E-11 | 2.188416598 |
| 0.00054     | 2.18640192  |
| 0.00087     | 2.18640192  |
| 1.44063E-11 | 2.185596568 |
| 1.11022E-16 | 2.18549592  |
| 0.00012     | 2.184640598 |
| 1.11022E-16 | 2.184439394 |
| 1.11022E-16 | 2.182378126 |
| 4.95077E-10 | 2.181172432 |
| 1.54743E-12 | 2.179465506 |
| 6.90781E-13 | 2.177910356 |
| 2.13115E-09 | 2.177509207 |
| 5.57952E-07 | 2.176306203 |
| 6.2035E-10  | 2.176005556 |
| 1.11022E-16 | 2.175755049 |
| 5.9952E-15  | 2.175704951 |
| 3.03868E-13 | 2.175654854 |
| 2.35269E-10 | 2.174853461 |
| 3.47092E-10 | 2.174703232 |
| 0.00086     | 2.17435274  |
| 0.00065     | 2.170900907 |
| 1.11022E-16 | 2.169401819 |
| 3.12662E-08 | 2.169351867 |
| 3.98039E-07 | 2.169152072 |
| 3.68527E-12 | 2.168652664 |
| 9.05442E-12 | 2.168502864 |
| 2.22045E-16 | 2.166606292 |
| 1.11022E-16 | 2.161274851 |
| 1.11022E-16 | 2.15665164  |
| 2.00178E-09 | 2.154666205 |
| 5.60663E-14 | 2.152930449 |
| 1.11022E-16 | 2.152434775 |
| 2.22045E-16 | 2.148819814 |
| 1.28896E-06 | 2.148424024 |
| 1.11022E-16 | 2.144717029 |
| 3.77731E-12 | 2.144371369 |
| 2.77556E-14 | 2.142693243 |
| 8.78771E-07 | 2.141657409 |
| 5.75588E-11 | 2.141460164 |
| 1.22345E-10 | 2.138946884 |

|             |             |
|-------------|-------------|
| 3.15098E-06 | 2.138946884 |
| 1.11022E-16 | 2.137715962 |
| 1.11022E-16 | 2.136682534 |
| 8.95151E-07 | 2.135846316 |
| 0.00062     | 2.135108748 |
| 1.11022E-16 | 2.135059586 |
| 1.11022E-16 | 2.130345288 |
| 0.00037     | 2.12960962  |
| 0.00036     | 2.128090044 |
| 1.11022E-16 | 2.125935088 |
| 3.24173E-07 | 2.125886138 |
| 2.31796E-07 | 2.125396691 |
| 6.21725E-15 | 2.124564889 |
| 2.29546E-06 | 2.123586716 |
| 0.00001     | 2.122560119 |
| 4.96977E-09 | 2.120606069 |
| 0.00005     | 2.120410763 |
| 2.00271E-11 | 2.119678526 |
| 9.40853E-11 | 2.118751388 |
| 3.10064E-09 | 2.118068493 |
| 1.11022E-16 | 2.115972407 |
| 0.0005      | 2.115874965 |
| 2.87601E-09 | 2.115680095 |
| 7.16274E-08 | 2.115192997 |
| 1.28683E-10 | 2.112807841 |
| 5.80818E-10 | 2.11125164  |
| 0.00002     | 2.11125164  |
| 0.00009     | 2.111008587 |
| 0.00005     | 2.110862769 |
| 2.94369E-07 | 2.110231006 |
| 3.63801E-06 | 2.106832456 |
| 4.54303E-13 | 2.106589911 |
| 9.35864E-06 | 2.105571531 |
| 1.11022E-16 | 2.104553643 |
| 0.00004     | 2.102567756 |
| 3.995E-10   | 2.102567756 |
| 1.73673E-11 | 2.100051765 |
| 1.11022E-16 | 2.099761652 |
| 0.00041     | 2.097876896 |
| 4.47849E-08 | 2.09691101  |
| 2.19542E-07 | 2.096235155 |
| 0.0002      | 2.095173536 |
| 1.63505E-07 | 2.093003719 |
| 1.79649E-07 | 2.091510263 |
| 4.48359E-11 | 2.090306639 |
| 7.89858E-09 | 2.090258509 |
| 0.00001     | 2.089777264 |
| 0.00015     | 2.089248024 |
| 6.52367E-13 | 2.088526547 |
| 1.89293E-13 | 2.08511494  |
| 8.88178E-15 | 2.084922902 |

|             |             |
|-------------|-------------|
| 2.49567E-06 | 2.08463488  |
| 7.0998E-09  | 2.084250911 |
| 9.98412E-06 | 2.08415493  |
| 1.00357E-09 | 2.082044464 |
| 1.11022E-16 | 2.080127713 |
| 1.11022E-16 | 2.079648801 |
| 1.00919E-13 | 2.07826058  |
| 0.00048     | 2.077303726 |
| 0.00084     | 2.076060474 |
| 9.01449E-11 | 2.07391045  |
| 0.00009     | 2.07343297  |
| 0.00035     | 2.072573782 |
| 2.41079E-09 | 2.072096609 |
| 3.98647E-10 | 2.071905771 |
| 3.77587E-12 | 2.070475043 |
| 2.75218E-06 | 2.06976005  |
| 0.00023     | 2.069664736 |
| 6.27406E-10 | 2.067568943 |
| 1.53807E-08 | 2.06647426  |
| 9.76996E-15 | 2.066331518 |
| 0.00001     | 2.063098674 |
| 0.00005     | 2.062481207 |
| 1.14304E-11 | 2.062433717 |
| 0.00012     | 2.062148801 |
| 1.76053E-09 | 2.060487575 |
| 8.29697E-08 | 2.058732877 |
| 7.86336E-08 | 2.057074402 |
| 1.27862E-11 | 2.056174647 |
| 0.00027     | 2.055417264 |
| 1.11022E-16 | 2.055322611 |
| 5.12473E-07 | 2.053241341 |
| 1.14595E-06 | 2.0505955   |
| 2.58967E-11 | 2.0505955   |
| 1.51767E-13 | 2.049934573 |
| 0.00008     | 2.047953069 |
| 1.11022E-16 | 2.046067702 |
| 1.65115E-06 | 2.045361138 |
| 1.36002E-07 | 2.043995804 |
| 1.11022E-16 | 2.043713435 |
| 0.00028     | 2.042913602 |
| 1.75537E-12 | 2.04122087  |
| 1.12443E-12 | 2.04060995  |
| 0.00002     | 2.039952241 |
| 2.13439E-06 | 2.038402766 |
| 1.11022E-16 | 2.037370437 |
| 5.29543E-12 | 2.036995174 |
| 0.0002      | 2.036760669 |
| 1.11022E-16 | 2.036573085 |
| 3.43452E-06 | 2.036010437 |
| 3.86083E-09 | 2.033480443 |
| 1.67995E-06 | 2.033059083 |

|             |             |
|-------------|-------------|
| 2.29775E-06 | 2.032310215 |
| 8.60589E-09 | 2.031327743 |
| 3.81917E-14 | 2.030158753 |
| 9.37745E-08 | 2.027636031 |
| 1.11022E-16 | 2.027449287 |
| 1.91041E-08 | 2.027029177 |
| 1.63314E-13 | 2.026655819 |
| 0.00021     | 2.026142564 |
| 2.29867E-11 | 2.024976558 |
| 9.49302E-07 | 2.024510344 |
| 9.02835E-09 | 2.023997632 |
| 2.79248E-10 | 2.022506844 |
| 1.26645E-07 | 2.020924086 |
| 2.19884E-06 | 2.020551852 |
| 1.22125E-15 | 2.019807591 |
| 3.06908E-07 | 2.017669365 |
| 9.28596E-10 | 2.017204833 |
| 3.83795E-06 | 2.017065494 |
| 0.00033     | 2.016322517 |
| 0.00044     | 2.016183239 |
| 1.61204E-13 | 2.015069363 |
| 2.51126E-10 | 2.012287364 |
| 6.61588E-07 | 2.009786849 |
| 9.83891E-08 | 2.008167804 |
| 0.0001      | 2.007844152 |
| 2.13163E-14 | 2.007520552 |
| 0.00001     | 2.006688676 |
| 0.00003     | 2.004933627 |
| 8.88178E-16 | 2.004333568 |
| 2.12053E-14 | 1.999677684 |
| 1.53466E-12 | 1.999585598 |
| 3.26473E-08 | 1.999079198 |
| 3.16043E-11 | 1.998941111 |
| 0.00001     | 1.997192838 |
| 0.00003     | 1.997008898 |
| 6.19726E-13 | 1.995583939 |
| 8.80828E-10 | 1.995262315 |
| 2.06168E-13 | 1.99466515  |
| 8.85039E-06 | 1.994481443 |
| 1.11022E-16 | 1.994435519 |
| 5.73833E-10 | 1.993930424 |
| 1.62727E-09 | 1.993012396 |
| 1.93854E-08 | 1.992599422 |
| 0.00011     | 1.991223458 |
| 1.41885E-10 | 1.990077548 |
| 2.99474E-08 | 1.989207097 |
| 6.22077E-08 | 1.989069692 |
| 4.05583E-11 | 1.988565956 |
| 8.23287E-07 | 1.987787705 |
| 2.53466E-08 | 1.987787705 |
| 1.69198E-13 | 1.986460803 |

|             |             |
|-------------|-------------|
| 2.18647E-12 | 1.985820547 |
| 0.00082     | 1.985226208 |
| 1.95022E-12 | 1.983992381 |
| 2.97668E-07 | 1.983672625 |
| 1.03656E-08 | 1.983444259 |
| 4.74404E-10 | 1.981937705 |
| 3.33067E-16 | 1.981253287 |
| 1.11022E-16 | 1.9810252   |
| 1.3694E-07  | 1.980705922 |
| 0.00053     | 1.980341096 |
| 0.00007     | 1.975513492 |
| 6.20762E-10 | 1.974831291 |
| 0.00076     | 1.97478582  |
| 1.11022E-16 | 1.974467547 |
| 0.00064     | 1.971968621 |
| 1.11022E-16 | 1.969608909 |
| 3.55625E-08 | 1.966799096 |
| 0.00055     | 1.965803029 |
| 8.10463E-15 | 1.965757766 |
| 5.15588E-08 | 1.964943196 |
| 0.00039     | 1.963450695 |
| 9.77036E-06 | 1.961959328 |
| 1.33227E-15 | 1.961552788 |
| 5.65934E-07 | 1.95852897  |
| 9.39311E-09 | 1.957717396 |
| 3.06657E-07 | 1.956275428 |
| 0.00002     | 1.95523967  |
| 1.11022E-16 | 1.95456447  |
| 1.03048E-10 | 1.95456447  |
| 5.35949E-12 | 1.954024479 |
| 0.00009     | 1.953034882 |
| 1.8969E-06  | 1.952944943 |
| 5.28466E-14 | 1.952944943 |
| 0.00004     | 1.951596363 |
| 0.00009     | 1.95150649  |
| 8.88178E-16 | 1.949081503 |
| 2.22045E-16 | 1.947825289 |
| 0.00018     | 1.947556205 |
| 0.00063     | 1.947197485 |
| 0.00002     | 1.946749178 |
| 2.24283E-11 | 1.946390607 |
| 3.89012E-09 | 1.946032101 |
| 0.0005      | 1.945494467 |
| 0.0001      | 1.945315289 |
| 1.93988E-06 | 1.94365867  |
| 1.11022E-16 | 1.94303221  |
| 6.64802E-07 | 1.942227057 |
| 4.51331E-11 | 1.941735184 |
| 7.24314E-06 | 1.940930569 |
| 2.18197E-08 | 1.940215635 |
| 6.27787E-09 | 1.938607997 |

|             |             |
|-------------|-------------|
| 2.09112E-06 | 1.937715441 |
| 2.69784E-14 | 1.937492366 |
| 4.4415E-09  | 1.936644916 |
| 2.56462E-14 | 1.936600323 |
| 0.00008     | 1.935976138 |
| 0.00052     | 1.933481407 |
| 1.18074E-08 | 1.933036257 |
| 1.28371E-10 | 1.93263571  |
| 5.88863E-07 | 1.93241322  |
| 3.79641E-12 | 1.932146266 |
| 1.11022E-16 | 1.932057289 |
| 4.54201E-06 | 1.929967519 |
| 0.00098     | 1.929789771 |
| 0.00013     | 1.929523179 |
| 3.48167E-11 | 1.929034523 |
| 1.11022E-16 | 1.926992392 |
| 1.29014E-10 | 1.926948022 |
| 1.96009E-09 | 1.926859285 |
| 1.09912E-14 | 1.926060834 |
| 1.82758E-06 | 1.925528717 |
| 7.04706E-07 | 1.924730817 |
| 0.00074     | 1.924642182 |
| 7.47444E-06 | 1.924110458 |
| 7.10543E-15 | 1.923623172 |
| 2.54737E-11 | 1.922781788 |
| 7.60725E-13 | 1.922383366 |
| 0.000001851 | 1.922206316 |
| 0.00053     | 1.92207354  |
| 6.86673E-13 | 1.921896518 |
| 0.00002     | 1.92070205  |
| 2.55628E-09 | 1.919729329 |
| 2.84948E-06 | 1.918447858 |
| 1.11022E-16 | 1.918050335 |
| 1.34468E-06 | 1.917034815 |
| 4.21885E-15 | 1.916240435 |
| 0.00017     | 1.915534596 |
| 2.14829E-08 | 1.914961293 |
| 1.64143E-06 | 1.914740838 |
| 3.33067E-16 | 1.91319836  |
| 1.11022E-16 | 1.912890014 |
| 0.00028     | 1.911701144 |
| 1.19863E-07 | 1.911217001 |
| 1.11022E-16 | 1.910864974 |
| 1.04361E-14 | 1.908490489 |
| 1.42849E-09 | 1.907875364 |
| 2.01951E-07 | 1.907128692 |
| 6.10403E-09 | 1.906909138 |
| 2.20614E-07 | 1.906821324 |
| 0.0004      | 1.905197487 |
| 3.55832E-11 | 1.905065885 |
| 0.00002     | 1.904101083 |

|             |             |
|-------------|-------------|
| 0.00078     | 1.90405724  |
| 2.24316E-06 | 1.903925717 |
| 1.11022E-16 | 1.903487372 |
| 4.44089E-16 | 1.903136769 |
| 3.94728E-06 | 1.902129145 |
| 0.00049     | 1.902085347 |
| 3.69266E-07 | 1.900946963 |
| 0.00056     | 1.900815654 |
| 5.24429E-10 | 1.900596828 |
| 2.6866E-08  | 1.900509304 |
| 1.58795E-12 | 1.900509304 |
| 8.03248E-07 | 1.900465543 |
| 1.11022E-16 | 1.898715956 |
| 2.85265E-07 | 1.896749595 |
| 0.00003     | 1.895090698 |
| 5.81325E-06 | 1.894043722 |
| 4.87388E-14 | 1.892517918 |
| 3.60505E-07 | 1.891733697 |
| 3.06422E-14 | 1.891603026 |
| 1.7337E-07  | 1.891515916 |
| 3.64109E-10 | 1.891036885 |
| 2.62493E-07 | 1.890688576 |
| 9.21809E-06 | 1.890166231 |
| 1.63103E-12 | 1.888687039 |
| 0.0004      | 1.888252203 |
| 3.16843E-07 | 1.887730531 |
| 1.86833E-11 | 1.885905817 |
| 1.30164E-11 | 1.885905817 |
| 0.00002     | 1.885428207 |
| 0.00008     | 1.88469032  |
| 7.22755E-14 | 1.884299791 |
| 0.00076     | 1.881481706 |
| 1.46085E-11 | 1.881395063 |
| 0.00003     | 1.881221788 |
| 2.60472E-08 | 1.881048529 |
| 0.00051     | 1.880182473 |
| 1.38401E-06 | 1.878970666 |
| 2.2171E-11  | 1.878451559 |
| 8.88178E-16 | 1.878278555 |
| 0.00002     | 1.878019079 |
| 0.00003     | 1.876246953 |
| 1.11022E-16 | 1.875814981 |
| 3.14977E-11 | 1.875771789 |
| 1.28786E-14 | 1.874605988 |
| 0.00015     | 1.873656612 |
| 0.00015     | 1.87361347  |
| 2.33147E-15 | 1.872578359 |
| 0.00001     | 1.872233449 |
| 1.00739E-11 | 1.871759302 |
| 0.00005     | 1.871069847 |
| 0.00027     | 1.870983683 |



|             |             |
|-------------|-------------|
| 2.55714E-06 | 1.870423714 |
| 2.50214E-06 | 1.869993083 |
| 0.00045     | 1.86943341  |
| 3.83955E-08 | 1.869089079 |
| 0.00011     | 1.868916938 |
| 0.00001     | 1.868916938 |
| 2.47811E-06 | 1.868873905 |
| 4.22984E-10 | 1.868658755 |
| 1.07838E-08 | 1.867798404 |
| 1.36752E-06 | 1.867497375 |
| 0.00008     | 1.866121859 |
| 2.21238E-08 | 1.865864062 |
| 8.90246E-11 | 1.86333096  |
| 9.29146E-13 | 1.863288056 |
| 0.00047     | 1.86152983  |
| 5.75195E-08 | 1.860501395 |
| 2.62707E-09 | 1.860201542 |
| 3.5415E-12  | 1.859816087 |
| 1.11022E-16 | 1.8596448   |
| 1.03472E-07 | 1.859002612 |
| 3.33067E-16 | 1.858703    |
| 1.47811E-07 | 1.85823228  |
| 0.00001     | 1.85759058  |
| 1.11022E-15 | 1.856949101 |
| 0.00015     | 1.856436078 |
| 0.00003     | 1.855837731 |
| 0.00009     | 1.855794999 |
| 6.36835E-12 | 1.855325014 |
| 5.71432E-13 | 1.855196858 |
| 8.52099E-08 | 1.854556206 |
| 0.00069     | 1.853958464 |
| 2.52498E-12 | 1.852848883 |
| 0.00053     | 1.852678237 |
| 8.29567E-10 | 1.852422298 |
| 1.41812E-11 | 1.850248241 |
| 2.0095E-13  | 1.850248241 |
| 1.11022E-16 | 1.849609298 |
| 2.61491E-12 | 1.849396366 |
| 1.11022E-16 | 1.847396004 |
| 2.19823E-11 | 1.847098263 |
| 2.7505E-06  | 1.847098263 |
| 3.73334E-09 | 1.846545443 |
| 2.41416E-11 | 1.846502925 |
| 0.00063     | 1.842637902 |
| 1.56219E-12 | 1.842044001 |
| 6.75767E-06 | 1.840856774 |
| 6.27551E-07 | 1.840687233 |
| 7.15323E-11 | 1.840305822 |
| 3.1339E-06  | 1.839204412 |
| 5.87713E-09 | 1.836834382 |
| 4.59849E-11 | 1.836411484 |

|             |             |
|-------------|-------------|
| 0.00078     | 1.835481451 |
| 9.02582E-09 | 1.835481451 |
| 0.00001     | 1.833074011 |
| 0.00005     | 1.832567583 |
| 1.55475E-07 | 1.832103482 |
| 0.00074     | 1.830585424 |
| 2.89683E-08 | 1.829953271 |
| 8.30598E-10 | 1.828016031 |
| 0.00004     | 1.827595163 |
| 4.29045E-09 | 1.827006111 |
| 9.41626E-07 | 1.82687991  |
| 1.40874E-06 | 1.826795781 |
| 1.61117E-06 | 1.825744496 |
| 5.17183E-07 | 1.825702457 |
| 2.08317E-08 | 1.825366181 |
| 0.00026     | 1.824861883 |
| 0.00018     | 1.824861883 |
| 3.07625E-07 | 1.824777847 |
| 5.82867E-14 | 1.824777847 |
| 7.21645E-15 | 1.822888059 |
| 4.20934E-06 | 1.822846086 |
| 7.77156E-16 | 1.822300524 |
| 0.00007     | 1.822048781 |
| 0.00015     | 1.821419576 |
| 0.00001     | 1.820497136 |
| 0.00002     | 1.82032947  |
| 6.5845E-10  | 1.818779289 |
| 0.00004     | 1.818569906 |
| 1.91199E-06 | 1.818360547 |
| 0.00002     | 1.818234944 |
| 1.66519E-08 | 1.818067486 |
| 7.57917E-11 | 1.817774472 |
| 1.11022E-16 | 1.81677021  |
| 0.00002     | 1.816644716 |
| 1.71869E-06 | 1.816519231 |
| 1.11022E-16 | 1.815599272 |
| 0.00026     | 1.81476335  |
| 6.5845E-07  | 1.812967421 |
| 0.00002     | 1.811882373 |
| 2.53639E-06 | 1.810923064 |
| 0.00007     | 1.810672893 |
| 0.0006      | 1.810130975 |
| 0.00059     | 1.809714225 |
| 0.00004     | 1.808547835 |
| 0.00039     | 1.807840036 |
| 1.52064E-10 | 1.80754867  |
| 3.36136E-11 | 1.806966079 |
| 0.00018     | 1.8062589   |
| 0.00057     | 1.806134132 |
| 6.25168E-10 | 1.804139022 |
| 6.0324E-12  | 1.802685643 |

|             |             |
|-------------|-------------|
| 1.37379E-09 | 1.802561122 |
| 1.74069E-06 | 1.802270607 |
| 4.20775E-14 | 1.802229109 |
| 0.00007     | 1.801565266 |
| 7.04342E-11 | 1.801482302 |
| 0.00002     | 1.801233436 |
| 1.33227E-15 | 1.800901667 |
| 2.2788E-08  | 1.8005285   |
| 0.00001     | 1.799285168 |
| 7.62336E-10 | 1.799160882 |
| 1.84286E-11 | 1.797380394 |
| 7.16596E-06 | 1.797214857 |
| 9.25482E-13 | 1.797132094 |
| 0.0009      | 1.796925203 |
| 2.06102E-08 | 1.796594228 |
| 3.91248E-07 | 1.795477636 |
| 9.76996E-14 | 1.795105593 |
| 4.88498E-15 | 1.794692302 |
| 3.93528E-06 | 1.794031235 |
| 0.00006     | 1.792297091 |
| 1.11022E-16 | 1.792255823 |
| 6.42459E-06 | 1.791760673 |
| 0.00002     | 1.791760673 |
| 5.46212E-08 | 1.791306905 |
| 1.82294E-11 | 1.790812017 |
| 0.00092     | 1.789286973 |
| 1.37845E-12 | 1.789245773 |
| 4.66851E-06 | 1.789039791 |
| 7.74778E-07 | 1.788586712 |
| 0.00014     | 1.788504347 |
| 3.57126E-06 | 1.787804393 |
| 1.20021E-09 | 1.787310472 |
| 5.18274E-12 | 1.787063563 |
| 5.56205E-08 | 1.786734404 |
| 0.00017     | 1.786610985 |
| 0.00043     | 1.785747291 |
| 3.4303E-06  | 1.785706173 |
| 6.02851E-14 | 1.785048416 |
| 1.45879E-06 | 1.784308729 |
| 1.63047E-12 | 1.783240832 |
| 0.00057     | 1.782337727 |
| 0.00004     | 1.781188982 |
| 6.37824E-08 | 1.781147969 |
| 0.00026     | 1.780696889 |
| 8.12325E-11 | 1.780573887 |
| 1.11022E-16 | 1.779549201 |
| 0.00077     | 1.779344335 |
| 9.46507E-11 | 1.779262395 |
| 1.33227E-15 | 1.778688921 |
| 2.4934E-08  | 1.778443203 |
| 1.59566E-08 | 1.777747187 |

|             |             |
|-------------|-------------|
| 0.00002     | 1.77766532  |
| 1.71199E-10 | 1.777378817 |
| 0.00012     | 1.777296968 |
| 3.32778E-06 | 1.777215122 |
| 0.00015     | 1.777051442 |
| 4.13898E-08 | 1.776805951 |
| 1.16237E-09 | 1.775906104 |
| 2.6944E-07  | 1.775742545 |
| 4.23551E-06 | 1.775701657 |
| 0.00034     | 1.775047585 |
| 1.11022E-16 | 1.774557189 |
| 3.09132E-08 | 1.774434611 |
| 1.96588E-06 | 1.773658481 |
| 0.00002     | 1.77329096  |
| 5.25373E-06 | 1.772882691 |
| 0.00009     | 1.77284187  |
| 2.98428E-13 | 1.772311274 |
| 0.00002     | 1.772311274 |
| 1.21695E-07 | 1.77210724  |
| 0.00063     | 1.771005867 |
| 8.47235E-08 | 1.770965089 |
| 1.11022E-16 | 1.770965089 |
| 1.63292E-09 | 1.770638895 |
| 6.37123E-06 | 1.770557356 |
| 2.13718E-09 | 1.770557356 |
| 3.10512E-07 | 1.769538435 |
| 1.51966E-07 | 1.767990797 |
| 4.0945E-13  | 1.767705853 |
| 5.81757E-13 | 1.767217486 |
| 8.54771E-07 | 1.766729253 |
| 0.00002     | 1.766444513 |
| 0.00008     | 1.763762075 |
| 2.98293E-09 | 1.763640243 |
| 1.11022E-16 | 1.763315398 |
| 0.00003     | 1.763112401 |
| 7.51266E-09 | 1.763071804 |
| 0.00002     | 1.762990613 |
| 6.8708E-07  | 1.762909426 |
| 5.72075E-06 | 1.762868834 |
| 1.9359E-11  | 1.760678253 |
| 1.11022E-16 | 1.758652363 |
| 6.05834E-10 | 1.758530884 |
| 1.10066E-07 | 1.758409413 |
| 1.39591E-09 | 1.756669253 |
| 0.00066     | 1.755739177 |
| 0.00037     | 1.754930816 |
| 5.82438E-09 | 1.754728783 |
| 1.42076E-06 | 1.754284394 |
| 1.39827E-07 | 1.753557455 |
| 2.88367E-09 | 1.753557455 |
| 5.83311E-13 | 1.752911539 |

|             |             |
|-------------|-------------|
| 1.11022E-16 | 1.752871178 |
| 0.00007     | 1.752064136 |
| 3.75712E-07 | 1.751983453 |
| 8.5354E-06  | 1.75117682  |
| 0.00022     | 1.751015538 |
| 2.86645E-09 | 1.750854271 |
| 5.32907E-15 | 1.750773643 |
| 0.00018     | 1.750451169 |
| 1.05664E-09 | 1.750451169 |
| 0.00041     | 1.750209352 |
| 7.11442E-06 | 1.749806397 |
| 1.11022E-16 | 1.749564669 |
| 3.44023E-06 | 1.748879955 |
| 9.48629E-07 | 1.747994251 |
| 3.16422E-07 | 1.747752774 |
| 0.00003     | 1.747632047 |
| 0.00041     | 1.747511329 |
| 1.69642E-13 | 1.74739062  |
| 0.00034     | 1.747269918 |
| 0.00056     | 1.746465456 |
| 0.00002     | 1.74570156  |
| 3.09131E-06 | 1.744375587 |
| 1.61777E-07 | 1.744335422 |
| 4.27371E-06 | 1.744255094 |
| 0.00002     | 1.743813357 |
| 0.0008      | 1.74345202  |
| 1.77878E-06 | 1.740163279 |
| 2.67842E-08 | 1.740083144 |
| 2.10458E-06 | 1.739682521 |
| 0.00089     | 1.739482244 |
| 1.11022E-16 | 1.739121804 |
| 9.93009E-08 | 1.73908176  |
| 6.02974E-06 | 1.73908176  |
| 1.07936E-12 | 1.738841513 |
| 0.00031     | 1.738441176 |
| 1.17113E-09 | 1.737880859 |
| 0.00003     | 1.737760815 |
| 2.05383E-11 | 1.737720802 |
| 1.50153E-06 | 1.737640779 |
| 0.00064     | 1.737040723 |
| 0.00013     | 1.736200992 |
| 3.83585E-07 | 1.734123406 |
| 0.0001      | 1.733205266 |
| 3.94752E-08 | 1.732925929 |
| 0.0004      | 1.732128071 |
| 1.77225E-11 | 1.732088188 |
| 3.64884E-07 | 1.731848908 |
| 6.66134E-16 | 1.731569789 |
| 0.00067     | 1.730453765 |
| 0.00033     | 1.73025455  |
| 5.83488E-06 | 1.730135033 |

|             |             |
|-------------|-------------|
| 1.11022E-16 | 1.730095195 |
| 0.00095     | 1.72894031  |
| 0.00007     | 1.727467956 |
| 0.00086     | 1.72695094  |
| 9.53751E-10 | 1.72683165  |
| 1.49169E-09 | 1.726632853 |
| 2.32773E-09 | 1.726076342 |
| 0.00008     | 1.725480279 |
| 2.71288E-09 | 1.725241912 |
| 2.34729E-06 | 1.723256796 |
| 1.05942E-08 | 1.722582378 |
| 1.11022E-16 | 1.721155068 |
| 1.05101E-10 | 1.720283406 |
| 1.54663E-09 | 1.719451776 |
| 2.77322E-06 | 1.719214241 |
| 0.00008     | 1.717631515 |
| 1.11022E-16 | 1.716445427 |
| 0.00064     | 1.716445427 |
| 5.52026E-09 | 1.716247826 |
| 2.38298E-12 | 1.715971221 |
| 0.00004     | 1.715773674 |
| 6.89037E-11 | 1.715536648 |
| 0.00004     | 1.715220663 |
| 0.00082     | 1.713325979 |
| 0.00005     | 1.713247079 |
| 0.00001     | 1.711748674 |
| 0.00021     | 1.711472794 |
| 0.00002     | 1.710881775 |
| 0.00002     | 1.710842381 |
| 9.57012E-14 | 1.710566648 |
| 0.00002     | 1.710133443 |
| 5.60663E-14 | 1.710094066 |
| 5.65978E-08 | 1.71005469  |
| 3.11739E-07 | 1.709424799 |
| 4.66654E-10 | 1.709228005 |
| 1.70568E-07 | 1.707222005 |
| 1.62674E-06 | 1.705964541 |
| 3.47057E-08 | 1.705453961 |
| 4.40787E-06 | 1.704904276 |
| 0.00017     | 1.703923137 |
| 1.65225E-09 | 1.70384467  |
| 1.11022E-16 | 1.703491614 |
| 5.71802E-06 | 1.703295504 |
| 4.84763E-07 | 1.702824931 |
| 0.00001     | 1.702746515 |
| 0.00089     | 1.702628897 |
| 0.00007     | 1.702393687 |
| 5.24142E-07 | 1.70231529  |
| 9.87865E-06 | 1.701805802 |
| 4.2958E-08  | 1.701766617 |
| 6.73497E-08 | 1.70106144  |

|             |             |
|-------------|-------------|
| 5.53878E-09 | 1.700630642 |
| 1.37253E-07 | 1.700278253 |
| 3.33333E-06 | 1.700004222 |
| 2.45362E-07 | 1.697774475 |
| 7.98916E-13 | 1.697266346 |
| 5.02076E-12 | 1.6967193   |
| 0.00002     | 1.696641165 |
| 1.58743E-06 | 1.696445844 |
| 0.00012     | 1.695391494 |
| 2.37638E-08 | 1.69523535  |
| 6.25279E-06 | 1.694845053 |
| 5.0665E-12  | 1.694688959 |
| 1.72267E-09 | 1.694259775 |
| 2.12884E-07 | 1.69394771  |
| 2.10942E-14 | 1.693401733 |
| 2.69629E-06 | 1.693362742 |
| 3.99838E-09 | 1.692894913 |
| 1.56319E-13 | 1.692894913 |
| 1.34426E-12 | 1.692738999 |
| 0.00001     | 1.692466184 |
| 1.71574E-12 | 1.692037563 |
| 4.89643E-08 | 1.691881727 |
| 0.00005     | 1.691842771 |
| 7.10615E-11 | 1.691180646 |
| 2.21743E-08 | 1.690285243 |
| 7.88466E-06 | 1.690090653 |
| 2.03017E-06 | 1.689896086 |
| 0.00065     | 1.68970154  |
| 3.63374E-09 | 1.689584824 |
| 0.00002     | 1.689468116 |
| 6.23519E-07 | 1.689079146 |
| 1.71911E-09 | 1.687291039 |
| 0.00006     | 1.687174489 |
| 0.00002     | 1.687019102 |
| 5.38954E-06 | 1.686786047 |
| 2.06344E-06 | 1.686048255 |
| 5.03389E-08 | 1.685621259 |
| 4.56513E-09 | 1.685233175 |
| 0.00002     | 1.684883976 |
| 0.00001     | 1.684883976 |
| 5.08298E-06 | 1.684534849 |
| 1.01733E-09 | 1.684496062 |
| 0.0006      | 1.684340921 |
| 2.55E-08    | 1.683914358 |
| 1.11022E-16 | 1.683875585 |
| 8.99281E-14 | 1.683720501 |
| 3.23852E-12 | 1.683332855 |
| 7.38758E-08 | 1.682286656 |
| 0.00021     | 1.68224792  |
| 2.9604E-07  | 1.682015525 |
| 8.77388E-09 | 1.681938067 |

|             |             |
|-------------|-------------|
| 1.13436E-09 | 1.681589551 |
| 1.20778E-06 | 1.681589551 |
| 0.0008      | 1.681550831 |
| 3.72808E-06 | 1.681241106 |
| 5.63082E-07 | 1.681047558 |
| 0.00031     | 1.680273585 |
| 0.00081     | 1.679770694 |
| 8.94288E-06 | 1.679461297 |
| 3.21675E-07 | 1.679267953 |
| 3.88578E-15 | 1.679151957 |
| 0.00086     | 1.678881332 |
| 2.46854E-11 | 1.676254667 |
| 7.12468E-09 | 1.676138879 |
| 1.57344E-06 | 1.675521481 |
| 0.00008     | 1.675135722 |
| 2.21267E-13 | 1.675058581 |
| 1.78133E-06 | 1.674827179 |
| 1.75935E-07 | 1.674827179 |
| 2.25188E-06 | 1.674248814 |
| 3.85471E-08 | 1.673901891 |
| 0.00006     | 1.673747726 |
| 2.00228E-06 | 1.673670649 |
| 0.00001     | 1.673208261 |
| 8.46926E-10 | 1.673092683 |
| 0.00016     | 1.673054159 |
| 1.86666E-08 | 1.672553429 |
| 6.15183E-09 | 1.672168354 |
| 9.74057E-09 | 1.671937351 |
| 0.00099     | 1.670475075 |
| 0.00042     | 1.670436612 |
| 6.55301E-09 | 1.67001357  |
| 0.00079     | 1.669859763 |
| 0.00022     | 1.66970597  |
| 6.2675E-06  | 1.669436867 |
| 1.48804E-08 | 1.669129374 |
| 1.20243E-10 | 1.669014078 |
| 1.11022E-16 | 1.668821937 |
| 0.00006     | 1.668437721 |
| 7.77156E-16 | 1.668360888 |
| 0.00007     | 1.667208823 |
| 0.00016     | 1.666786599 |
| 8.86452E-07 | 1.666402851 |
| 4.75592E-09 | 1.665597269 |
| 0.00023     | 1.665367174 |
| 0.00011     | 1.664868744 |
| 0.00035     | 1.66467708  |
| 0.00013     | 1.664255497 |
| 3.06482E-07 | 1.663987272 |
| 9.99556E-12 | 1.663642475 |
| 0.00036     | 1.663450952 |
| 0.00076     | 1.663336049 |



|             |             |
|-------------|-------------|
| 0.00025     | 1.662302278 |
| 0.00005     | 1.661345655 |
| 2.74558E-13 | 1.661230897 |
| 2.35101E-12 | 1.661154397 |
| 1.11022E-16 | 1.660466048 |
| 1.14321E-11 | 1.660236662 |
| 0.00004     | 1.660121981 |
| 2.74289E-08 | 1.660045532 |
| 2.51769E-06 | 1.660007308 |
| 3.41172E-13 | 1.659892643 |
| 2.68608E-06 | 1.659204817 |
| 4.04154E-12 | 1.658937407 |
| 0.00002     | 1.658937407 |
| 0.00001     | 1.658937407 |
| 0.00028     | 1.658440901 |
| 0.00007     | 1.65737201  |
| 0.00002     | 1.657257526 |
| 5.08225E-08 | 1.657028583 |
| 1.323E-10   | 1.656570793 |
| 0.00002     | 1.656494507 |
| 2.82032E-08 | 1.655769963 |
| 0.00004     | 1.655655591 |
| 0.00002     | 1.655350636 |
| 2.9865E-14  | 1.655274406 |
| 7.56653E-06 | 1.655160068 |
| 2.99681E-11 | 1.655045737 |
| 3.73526E-06 | 1.655007629 |
| 0.00029     | 1.654740895 |
| 0.00005     | 1.654626593 |
| 2.02117E-06 | 1.654398014 |
| 0.00008     | 1.654398014 |
| 2.29081E-07 | 1.65435992  |
| 5.20695E-14 | 1.654169466 |
| 6.21725E-15 | 1.652570516 |
| 0.00037     | 1.652494414 |
| 0.00008     | 1.652456364 |
| 2.90066E-07 | 1.651125178 |
| 3.9138E-11  | 1.651125178 |
| 1.5809E-08  | 1.650897082 |
| 0.00025     | 1.650402983 |
| 3.45083E-11 | 1.649909032 |
| 0.00065     | 1.648579898 |
| 5.72488E-08 | 1.6483142   |
| 0.00018     | 1.648200342 |
| 0.00009     | 1.648124442 |
| 1.56364E-09 | 1.647517362 |
| 5.48116E-09 | 1.646910506 |
| 4.52971E-14 | 1.646493422 |
| 0.00004     | 1.645811149 |
| 0.00027     | 1.645432231 |
| 0.00008     | 1.644409587 |

|             |             |
|-------------|-------------|
| 1.4761E-09  | 1.64282007  |
| 0.00068     | 1.642782243 |
| 6.05407E-08 | 1.64251748  |
| 0.00013     | 1.64247966  |
| 0.00001     | 1.642290573 |
| 8.24719E-06 | 1.641723444 |
| 0.00006     | 1.641647842 |
| 0.00055     | 1.641080934 |
| 0.00041     | 1.640929792 |
| 7.40791E-06 | 1.640892009 |
| 0.00039     | 1.640816445 |
| 5.6773E-09  | 1.640778664 |
| 6.31343E-07 | 1.640476449 |
| 0.00009     | 1.640212057 |
| 0.00013     | 1.639532387 |
| 0.00017     | 1.638815263 |
| 4.36928E-08 | 1.638664329 |
| 1.21202E-07 | 1.637495066 |
| 1.17246E-07 | 1.637419658 |
| 6.51001E-07 | 1.637344254 |
| 1.11022E-16 | 1.637193456 |
| 0.00002     | 1.637042672 |
| 0.00016     | 1.636778833 |
| 0.00012     | 1.636665772 |
| 0.00002     | 1.636477355 |
| 8.30214E-08 | 1.636439674 |
| 0.00006     | 1.635535594 |
| 4.58944E-08 | 1.635460276 |
| 0.00015     | 1.635046092 |
| 0.00002     | 1.634895506 |
| 0.00092     | 1.634782575 |
| 0.00049     | 1.63433093  |
| 4.5139E-10  | 1.63418041  |
| 1.03647E-11 | 1.633954655 |
| 0.00061     | 1.633051948 |
| 6.00277E-08 | 1.632675967 |
| 0.0003      | 1.632412832 |
| 0.00005     | 1.632300073 |
| 5.04773E-11 | 1.632262488 |
| 1.43391E-09 | 1.631210469 |
| 3.12301E-07 | 1.630834912 |
| 9.92485E-07 | 1.630459442 |
| 0.00041     | 1.630384358 |
| 0.00011     | 1.630384358 |
| 0.00001     | 1.629746286 |
| 0.00052     | 1.62970876  |
| 0.00031     | 1.629521144 |
| 0.00001     | 1.629221003 |
| 0.00003     | 1.629108464 |
| 7.97923E-08 | 1.628958424 |
| 1.49142E-08 | 1.62888341  |

|             |             |
|-------------|-------------|
| 0.00002     | 1.628733391 |
| 0.00013     | 1.628733391 |
| 1.66197E-08 | 1.62832091  |
| 1.81503E-11 | 1.627871051 |
| 0.00002     | 1.627496263 |
| 0.00001     | 1.627196495 |
| 0.00004     | 1.626934243 |
| 5.58575E-12 | 1.626334968 |
| 8.65932E-06 | 1.626185184 |
| 1.11022E-16 | 1.625885657 |
| 0.00002     | 1.625586186 |
| 0.00004     | 1.625548756 |
| 0.00005     | 1.625361618 |
| 1.10954E-09 | 1.624949992 |
| 8.30947E-10 | 1.624463658 |
| 1.3262E-06  | 1.623491428 |
| 1.57724E-08 | 1.623491428 |
| 7.8075E-06  | 1.623454047 |
| 2.45946E-07 | 1.623304528 |
| 1.11022E-16 | 1.622893422 |
| 0.00061     | 1.62166073  |
| 2.697E-07   | 1.621436705 |
| 0.00018     | 1.621026072 |
| 0.00019     | 1.620764815 |
| 0.00017     | 1.620727496 |
| 0.00028     | 1.620391663 |
| 0.00021     | 1.619384582 |
| 1.65447E-08 | 1.618937191 |
| 0.00003     | 1.618825363 |
| 0.00003     | 1.618825363 |
| 0.00009     | 1.618340862 |
| 0.00054     | 1.618340862 |
| 4.00682E-09 | 1.618303599 |
| 0.00012     | 1.618266337 |
| 0.00016     | 1.618154555 |
| 1.41387E-12 | 1.617931014 |
| 0.00053     | 1.617037159 |
| 0.00001     | 1.616962694 |
| 7.69164E-09 | 1.616962694 |
| 0.00004     | 1.616255441 |
| 7.23945E-10 | 1.616106586 |
| 0.00003     | 1.615808915 |
| 2.79776E-06 | 1.615808915 |
| 0.00041     | 1.615734506 |
| 0.00005     | 1.6156601   |
| 4.86607E-07 | 1.615548499 |
| 0.00003     | 1.6155113   |
| 0.00071     | 1.615474101 |
| 1.92725E-06 | 1.614916233 |
| 2.04301E-07 | 1.614544427 |
| 1.23203E-08 | 1.614209876 |

|             |             |
|-------------|-------------|
| 1.03351E-06 | 1.614172708 |
| 9.52175E-06 | 1.613503828 |
| 2.57214E-08 | 1.613206637 |
| 0.00007     | 1.612946639 |
| 3.87683E-06 | 1.6129095   |
| 9.44052E-06 | 1.612835225 |
| 1.77636E-15 | 1.612612419 |
| 0.00003     | 1.611795727 |
| 0.00065     | 1.611684392 |
| 6.22734E-06 | 1.611461745 |
| 7.86663E-06 | 1.61142464  |
| 2.36789E-08 | 1.610793988 |
| 0.00056     | 1.610089434 |
| 3.57858E-12 | 1.60927402  |
| 0.00001     | 1.609088756 |
| 1.21967E-10 | 1.608977608 |
| 0.00037     | 1.608755335 |
| 0.00003     | 1.608718292 |
| 3.72776E-06 | 1.607829527 |
| 3.9588E-06  | 1.607348318 |
| 1.76833E-07 | 1.607274298 |
| 0.00003     | 1.606904252 |
| 2.96073E-06 | 1.606867252 |
| 3.10862E-15 | 1.606682266 |
| 0.00005     | 1.606534291 |
| 0.00082     | 1.605794625 |
| 1.81362E-07 | 1.605203138 |
| 0.0001      | 1.605092258 |
| 0.00002     | 1.604833569 |
| 6.5918E-06  | 1.604537975 |
| 6.50195E-11 | 1.604427141 |
| 2.75646E-07 | 1.604316315 |
| 0.00009     | 1.604168559 |
| 0.00095     | 1.60405775  |
| 5.59774E-13 | 1.603873087 |
| 7.48956E-13 | 1.603540747 |
| 0.00007     | 1.603356143 |
| 0.00029     | 1.602986999 |
| 0.00004     | 1.602691745 |
| 7.7236E-12  | 1.602654842 |
| 0.00012     | 1.602359649 |
| 2.63287E-09 | 1.601585027 |
| 9.9587E-14  | 1.601437522 |
| 2.36595E-06 | 1.601326903 |
| 1.19817E-09 | 1.60084764  |
| 0.00004     | 1.600479073 |
| 8.62893E-06 | 1.600036906 |
| 5.75619E-06 | 1.600000064 |
| 1.51149E-06 | 1.599779031 |
| 0.00003     | 1.599631693 |
| 0.00003     | 1.599484368 |

|             |             |
|-------------|-------------|
| 0.00007     | 1.599189759 |
| 0.00099     | 1.599079295 |
| 1.85141E-07 | 1.598821575 |
| 9.63624E-10 | 1.598711136 |
| 0.00047     | 1.598600704 |
| 0.00001     | 1.598527088 |
| 6.04752E-06 | 1.598490281 |
| 5.93313E-09 | 1.598379865 |
| 0.00007     | 1.598306258 |
| 0.00012     | 1.596981922 |
| 2.22045E-16 | 1.596798074 |
| 0.00042     | 1.59665101  |
| 4.84508E-06 | 1.59628341  |
| 1.11022E-16 | 1.596246654 |
| 0.0002      | 1.59602614  |
| 0.00023     | 1.595915894 |
| 1.74831E-06 | 1.595254579 |
| 2.18714E-13 | 1.595217848 |
| 0.00001     | 1.594703693 |
| 0.00006     | 1.594593539 |
| 1.77542E-07 | 1.594226412 |
| 7.03319E-09 | 1.594006177 |
| 0.00011     | 1.593785972 |
| 2.689E-07   | 1.593639186 |
| 0.00009     | 1.593015495 |
| 1.95807E-07 | 1.592428714 |
| 0.00001     | 1.592282053 |
| 2.36109E-07 | 1.592098745 |
| 0.00017     | 1.590852812 |
| 0.00012     | 1.590633043 |
| 0.00001     | 1.590413304 |
| 3.8131E-07  | 1.589937307 |
| 0.00007     | 1.589827482 |
| 3.46629E-08 | 1.588875981 |
| 3.35858E-07 | 1.588546749 |
| 6.17408E-06 | 1.588473595 |
| 5.75593E-06 | 1.588400445 |
| 1.61712E-08 | 1.587778804 |
| 0.00001     | 1.587340145 |
| 6.32405E-12 | 1.587120861 |
| 0.00002     | 1.58591534  |
| 7.59126E-09 | 1.585659742 |
| 6.16321E-08 | 1.585477196 |
| 4.2958E-07  | 1.584783716 |
| 0.00005     | 1.583981117 |
| 0.00079     | 1.583762297 |
| 1.32305E-10 | 1.582705093 |
| 0.00028     | 1.582413575 |
| 4.52475E-09 | 1.58230427  |
| 0.00025     | 1.582267836 |
| 0.00016     | 1.582231404 |

|             |             |
|-------------|-------------|
| 1.14974E-07 | 1.581939973 |
| 0.00043     | 1.581867123 |
| 1.10904E-08 | 1.581539343 |
| 0.00035     | 1.581175222 |
| 2.51237E-09 | 1.580956789 |
| 0.0003      | 1.580629198 |
| 4.67824E-11 | 1.579537715 |
| 2.41975E-06 | 1.579355874 |
| 5.9365E-06  | 1.578992256 |
| 0.00013     | 1.578883187 |
| 8.23009E-08 | 1.578592372 |
| 9.46883E-06 | 1.578337954 |
| 1.44491E-08 | 1.57826527  |
| 5.01221E-12 | 1.578083576 |
| 0.00096     | 1.57782924  |
| 2.4488E-07  | 1.576558172 |
| 3.44989E-09 | 1.576558172 |
| 0.00002     | 1.57648557  |
| 0.0002      | 1.576304081 |
| 0.00003     | 1.576231491 |
| 1.27676E-14 | 1.576195198 |
| 4.11396E-06 | 1.576050032 |
| 7.97355E-08 | 1.575832307 |
| 1.54487E-09 | 1.575505777 |
| 0.0001      | 1.575360674 |
| 1.08056E-06 | 1.575179315 |
| 7.40836E-06 | 1.573982864 |
| 6.62455E-09 | 1.573837902 |
| 8.25096E-12 | 1.57322196  |
| 7.59157E-06 | 1.573004627 |
| 0.00009     | 1.572968407 |
| 0.00015     | 1.572171792 |
| 7.96247E-08 | 1.572135592 |
| 0.00011     | 1.5710138   |
| 0.00051     | 1.570543609 |
| 0.00002     | 1.570362804 |
| 2.27696E-08 | 1.569965106 |
| 4.60401E-09 | 1.569820514 |
| 4.84289E-11 | 1.569712078 |
| 0.00009     | 1.569422953 |
| 1.93956E-13 | 1.56935068  |
| 0.00009     | 1.569278411 |
| 1.39259E-10 | 1.569242277 |
| 0.00005     | 1.569133881 |
| 0.00017     | 1.568953239 |
| 0.00003     | 1.568050336 |
| 1.7249E-07  | 1.56790592  |
| 0.00004     | 1.567617128 |
| 0.00069     | 1.567220125 |
| 9.9025E-11  | 1.567039703 |
| 8.56516E-06 | 1.567003621 |

|             |             |
|-------------|-------------|
| 3.1834E-08  | 1.56696754  |
| 6.13595E-06 | 1.566318221 |
| 0.00004     | 1.566029721 |
| 4.08938E-09 | 1.565993662 |
| 0.00013     | 1.565885491 |
| 3.72462E-06 | 1.565308703 |
| 0.00013     | 1.565272661 |
| 2.12763E-12 | 1.56523662  |
| 7.22342E-09 | 1.564551992 |
| 2.15119E-10 | 1.564047722 |
| 6.39773E-08 | 1.563975696 |
| 7.17223E-06 | 1.563435612 |
| 0.00018     | 1.562895713 |
| 0.00002     | 1.562643825 |
| 4.54634E-08 | 1.562176139 |
| 1.01898E-08 | 1.56149285  |
| 0.00077     | 1.560953623 |
| 2.42029E-14 | 1.560270869 |
| 8.72891E-07 | 1.559660237 |
| 0.00017     | 1.559660237 |
| 0.00002     | 1.559624325 |
| 1.757E-08   | 1.558726791 |
| 0.00002     | 1.558296158 |
| 0.00008     | 1.558188519 |
| 0.00008     | 1.558116763 |
| 7.35336E-08 | 1.558116763 |
| 8.76404E-06 | 1.557865645 |
| 0.00003     | 1.557829774 |
| 0.00001     | 1.557650432 |
| 0.00005     | 1.557614567 |
| 2.25863E-07 | 1.557542837 |
| 0.00074     | 1.557363529 |
| 0.0007      | 1.556789881 |
| 3.39457E-07 | 1.556574817 |
| 6.51859E-06 | 1.556538976 |
| 4.98791E-11 | 1.555965632 |
| 8.47325E-06 | 1.555822328 |
| 3.30432E-08 | 1.555679039 |
| 1.8633E-06  | 1.555607399 |
| 0.00021     | 1.55557158  |
| 0.00003     | 1.555320871 |
| 0.00092     | 1.555249248 |
| 0.00008     | 1.555249248 |
| 0.00002     | 1.555034397 |
| 0.00003     | 1.554783775 |
| 5.84791E-06 | 1.554783775 |
| 0.00039     | 1.554640581 |
| 2.45827E-07 | 1.554640581 |
| 1.0449E-07  | 1.554568989 |
| 0.00027     | 1.553853248 |
| 0.00004     | 1.553853248 |

|             |             |
|-------------|-------------|
| 6.95835E-07 | 1.553745916 |
| 0.00033     | 1.55371014  |
| 7.10543E-15 | 1.553531272 |
| 0.00005     | 1.553030554 |
| 1.26964E-08 | 1.552994794 |
| 0.0004      | 1.552529997 |
| 1.21107E-10 | 1.55238701  |
| 0.00015     | 1.552315522 |
| 2.10581E-09 | 1.551922394 |
| 0.00013     | 1.55188666  |
| 3.0352E-08  | 1.551779463 |
| 0.00015     | 1.551386472 |
| 0.00011     | 1.550993579 |
| 0.00002     | 1.550957867 |
| 1.59165E-08 | 1.550457978 |
| 0.00021     | 1.550243789 |
| 3.58194E-10 | 1.549886873 |
| 0.00016     | 1.54920896  |
| 0.00058     | 1.548780957 |
| 4.37412E-06 | 1.548281769 |
| 1.07469E-06 | 1.548246119 |
| 0.00004     | 1.547568923 |
| 3.3511E-07  | 1.547212623 |
| 0.00055     | 1.547212623 |
| 0.00003     | 1.547176998 |
| 0.00003     | 1.546892023 |
| 0.00006     | 1.546713941 |
| 1.26059E-10 | 1.545325603 |
| 0.00005     | 1.544756389 |
| 1.01397E-06 | 1.544365176 |
| 0.00049     | 1.543760768 |
| 2.70391E-06 | 1.543725222 |
| 8.11217E-08 | 1.543583047 |
| 2.17078E-09 | 1.542730267 |
| 0.00012     | 1.542197519 |
| 0.00005     | 1.542019977 |
| 0.00041     | 1.541735952 |
| 2.0603E-08  | 1.541700453 |
| 0.00045     | 1.541132574 |
| 1.10013E-08 | 1.54102612  |
| 0.00007     | 1.540529432 |
| 6.90085E-08 | 1.539430192 |
| 0.00059     | 1.539323856 |
| 0.00004     | 1.539288412 |
| 0.00003     | 1.53886315  |
| 0.00008     | 1.538792284 |
| 0.00001     | 1.538615134 |
| 7.87299E-06 | 1.538579707 |
| 0.00005     | 1.538119223 |
| 0.00001     | 1.537977564 |
| 0.00057     | 1.537871328 |



|             |             |
|-------------|-------------|
| 7.73048E-13 | 1.537800508 |
| 3.26284E-06 | 1.537127881 |
| 0.00005     | 1.537127881 |
| 8.64436E-08 | 1.53642017  |
| 1.0397E-06  | 1.536172549 |
| 1.35758E-07 | 1.536137177 |
| 2.85272E-06 | 1.536101807 |
| 0.00001     | 1.536066437 |
| 1.0257E-08  | 1.535889601 |
| 0.00003     | 1.535818873 |
| 3.61673E-09 | 1.535359215 |
| 0.00001     | 1.53525316  |
| 4.90878E-06 | 1.534440314 |
| 0.00024     | 1.534087036 |
| 0.00047     | 1.533945748 |
| 1.78387E-09 | 1.533769156 |
| 0.00094     | 1.533274807 |
| 5.19074E-06 | 1.533168896 |
| 1.42993E-08 | 1.533133594 |
| 3.23163E-10 | 1.532392437 |
| 0.00008     | 1.531898532 |
| 0.00012     | 1.53154584  |
| 2.11822E-06 | 1.531263745 |
| 5.60801E-07 | 1.531016954 |
| 9.13298E-07 | 1.530875949 |
| 0.00069     | 1.530417771 |
| 0.0001      | 1.530382532 |
| 0.00026     | 1.530312057 |
| 0.00001     | 1.530135884 |
| 0.00005     | 1.530100651 |
| 5.92862E-06 | 1.529501827 |
| 0.00023     | 1.527601232 |
| 0.00004     | 1.525948933 |
| 2.43455E-09 | 1.52573813  |
| 0.00065     | 1.525316612 |
| 0.00037     | 1.524965435 |
| 2.26361E-07 | 1.524860098 |
| 1.08092E-08 | 1.523456296 |
| 0.00004     | 1.522684756 |
| 0.00005     | 1.522474404 |
| 8.76757E-07 | 1.522439348 |
| 0.00031     | 1.52215893  |
| 0.00013     | 1.522123882 |
| 1.05004E-08 | 1.521948651 |
| 3.33067E-15 | 1.52159825  |
| 2.60603E-10 | 1.521317987 |
| 0.00039     | 1.520862669 |
| 0.00037     | 1.520827651 |
| 0.00003     | 1.52037248  |
| 0.00042     | 1.520232455 |
| 0.00014     | 1.519882449 |

|             |             |
|-------------|-------------|
| 5.60762E-08 | 1.519812458 |
| 2.78161E-06 | 1.519672484 |
| 1.69609E-07 | 1.519602502 |
| 5.03044E-07 | 1.519147698 |
| 1.06618E-09 | 1.518378341 |
| 0.00052     | 1.518343379 |
| 2.97097E-07 | 1.518028761 |
| 5.55112E-16 | 1.517958855 |
| 0.00001     | 1.517749156 |
| 0.00006     | 1.51725997  |
| 2.69612E-06 | 1.517190099 |
| 0.00003     | 1.517050367 |
| 4.26633E-06 | 1.516561407 |
| 0.00006     | 1.516107513 |
| 4.48632E-06 | 1.516107513 |
| 6.84467E-07 | 1.515828262 |
| 1.44262E-10 | 1.515793359 |
| 0.00008     | 1.515549062 |
| 9.59795E-09 | 1.515130358 |
| 3.04442E-07 | 1.514676893 |
| 0.00062     | 1.514363035 |
| 3.59741E-06 | 1.51425843  |
| 7.80686E-06 | 1.514084104 |
| 1.04416E-08 | 1.513944658 |
| 0.00002     | 1.513770369 |
| 0.00001     | 1.513561248 |
| 0.00002     | 1.513456699 |
| 0.00023     | 1.513108253 |
| 0.00016     | 1.512899224 |
| 0.00036     | 1.512829554 |
| 1.4992E-06  | 1.51279472  |
| 1.49571E-07 | 1.512028579 |
| 0.00002     | 1.511680462 |
| 0.00009     | 1.511054053 |
| 5.74835E-06 | 1.510880096 |
| 0.00001     | 1.510671375 |
| 0.00003     | 1.510358347 |
| 4.82454E-08 | 1.51018447  |
| 0.00002     | 1.510045384 |
| 0.00022     | 1.510045384 |
| 0.00002     | 1.509211132 |
| 4.5283E-07  | 1.508655221 |
| 5.64767E-06 | 1.508516275 |
| 2.27126E-07 | 1.508238422 |
| 3.33322E-06 | 1.508064789 |
| 0.00006     | 1.508030065 |
| 2.81109E-09 | 1.507544012 |
| 0.00094     | 1.507474589 |
| 9.90726E-06 | 1.507405168 |
| 0.00003     | 1.507335751 |
| 2.85794E-12 | 1.506919317 |

|             |              |
|-------------|--------------|
| 3.40136E-06 | 1.506641757  |
| 4.91734E-11 | 1.506607066  |
| 0.00041     | 1.505982759  |
| 7.37873E-11 | 1.505740043  |
| 6.15569E-08 | 1.505358711  |
| 0.0002      | 1.504838868  |
| 6.25861E-06 | 1.504700274  |
| 1.61189E-06 | 1.504561692  |
| 0.00003     | 1.504353844  |
| 0.00059     | 1.503765095  |
| 8.17201E-09 | 1.503522737  |
| 2.06712E-12 | 1.502934314  |
| 2.20598E-09 | 1.50272669   |
| 0.0009      | 1.502622889  |
| 0.00079     | 1.502276937  |
| 9.4424E-06  | 1.501758159  |
| 0.00023     | 1.501550697  |
| 0.00068     | 1.500963046  |
| 0.0001      | 1.500928486  |
| 9.99582E-06 | 1.500755695  |
| 0.00025     | 1.500271986  |
| 0.0001      | 1.500168355  |
| 5.21064E-06 | -1.500444721 |
| 1.37953E-07 | -1.502034818 |
| 2.70392E-06 | -1.502865103 |
| 1.60035E-07 | -1.503107355 |
| 2.7665E-06  | -1.503557357 |
| 0.00064     | -1.504042125 |
| 0.00001     | -1.505566698 |
| 6.82621E-07 | -1.505705372 |
| 0.00005     | -1.506190833 |
| 5.9866E-06  | -1.50629488  |
| 0.00062     | -1.507023415 |
| 1.8407E-06  | -1.507544012 |
| 1.43799E-10 | -1.50830788  |
| 1.79088E-09 | -1.508516275 |
| 1.87171E-11 | -1.508863664 |
| 0.00001     | -1.509315389 |
| 0.00006     | -1.509802013 |
| 9.02756E-12 | -1.509871543 |
| 0.00002     | -1.510114925 |
| 2.99538E-13 | -1.510497462 |
| 1.72535E-07 | -1.511506433 |
| 4.18655E-06 | -1.512028579 |
| 0.00096     | -1.512307131 |
| 9.81557E-09 | -1.512341954 |
| 0.00038     | -1.512481252 |
| 4.55257E-08 | -1.513038573 |
| 0.00027     | -1.513561248 |
| 0.00005     | -1.513700659 |
| 1.67704E-06 | -1.513770369 |

|             |              |
|-------------|--------------|
| 1.14432E-06 | -1.51387494  |
| 1.95143E-10 | -1.51425843  |
| 0.00021     | -1.514746648 |
| 0.00022     | -1.514851286 |
| 0.00023     | -1.515653756 |
| 0.00028     | -1.516107513 |
| 0.00041     | -1.516386816 |
| 3.68431E-06 | -1.516421733 |
| 5.97812E-08 | -1.51725997  |
| 2.81453E-11 | -1.517469602 |
| 1.33227E-15 | -1.518623094 |
| 0.00026     | -1.519077741 |
| 0.00028     | -1.519952444 |
| 6.33595E-10 | -1.521423079 |
| 0.00009     | -1.521458112 |
| 0.00084     | -1.522509461 |
| 9.25831E-06 | -1.523561536 |
| 0.00009     | -1.525457105 |
| 4.89103E-06 | -1.526019208 |
| 5.94224E-11 | -1.526722127 |
| 0.00004     | -1.526757282 |
| 1.50561E-09 | -1.527249529 |
| 5.88646E-06 | -1.527284696 |
| 4.89953E-09 | -1.527636407 |
| 1.23349E-06 | -1.528973647 |
| 0.00003     | -1.529184897 |
| 0.00001     | -1.529220108 |
| 1.27633E-09 | -1.529360961 |
| 9.91096E-13 | -1.53094645  |
| 1.18857E-07 | -1.531369524 |
| 3.46645E-06 | -1.532110186 |
| 4.81183E-07 | -1.533204199 |
| 3.88412E-10 | -1.533451342 |
| 0.00001     | -1.535147112 |
| 1.51619E-11 | -1.53521781  |
| 1.19849E-06 | -1.535889601 |
| 1.08264E-06 | -1.535924967 |
| 1.02406E-08 | -1.536455548 |
| 0.00049     | -1.536667832 |
| 2.01543E-11 | -1.536844758 |
| 0.00001     | -1.537269462 |
| 1.52047E-09 | -1.537411056 |
| 8.95104E-08 | -1.537446457 |
| 9.85589E-06 | -1.539040328 |
| 0.00001     | -1.540848713 |
| 2.99697E-08 | -1.541274524 |
| 0.00091     | -1.541629457 |
| 1.18571E-06 | -1.542126499 |
| 0.00014     | -1.543227664 |
| 0.00038     | -1.544898673 |
| 1.0215E-07  | -1.545005394 |

|             |              |
|-------------|--------------|
| 0.0001      | -1.545610288 |
| 3.38219E-08 | -1.546357838 |
| 4.56352E-09 | -1.546820788 |
| 3.95749E-08 | -1.546892023 |
| 1.1958E-11  | -1.546963262 |
| 2.13082E-06 | -1.547034504 |
| 0.000001015 | -1.549672763 |
| 1.92826E-06 | -1.550172399 |
| 0.00062     | -1.550815025 |
| 0.00003     | -1.551100722 |
| 2.35115E-06 | -1.553423962 |
| 0.00066     | -1.557040826 |
| 2.71239E-12 | -1.557148386 |
| 0.00001     | -1.557291811 |
| 0.00037     | -1.558619122 |
| 0.0004      | -1.558942152 |
| 0.00003     | -1.559157543 |
| 1.28514E-07 | -1.559157543 |
| 0.00003     | -1.559444776 |
| 8.28282E-06 | -1.560055324 |
| 5.22028E-08 | -1.56088174  |
| 0.00002     | -1.561924366 |
| 5.90565E-09 | -1.562356001 |
| 1.74984E-09 | -1.562607844 |
| 0.00008     | -1.562931701 |
| 7.08176E-07 | -1.56321963  |
| 2.63244E-11 | -1.563687628 |
| 1.43681E-06 | -1.564876252 |
| 0.00011     | -1.565921547 |
| 0.00053     | -1.570254331 |
| 0.00002     | -1.571447947 |
| 0.00002     | -1.572280398 |
| 1.08573E-07 | -1.572570049 |
| 4.21387E-07 | -1.575215585 |
| 0.00001     | -1.575324401 |
| 0.00008     | -1.575759739 |
| 1.09801E-13 | -1.580156129 |
| 0.00019     | -1.582340704 |
| 2.4211E-09  | -1.58372583  |
| 0.00036     | -1.585769279 |
| 5.85649E-06 | -1.586280553 |
| 1.00917E-11 | -1.586865068 |
| 1.64922E-07 | -1.587449798 |
| 4.46426E-08 | -1.587669128 |
| 0.00001     | -1.588656485 |
| 8.22009E-13 | -1.589241876 |
| 2.28737E-09 | -1.589937307 |
| 4.86081E-09 | -1.594263121 |
| 0.00022     | -1.594703693 |
| 2.51802E-11 | -1.595915894 |
| 1.59306E-12 | -1.596136393 |

|             |              |
|-------------|--------------|
| 2.91486E-07 | -1.598085459 |
| 0.00058     | -1.598527088 |
| 3.40088E-10 | -1.598858389 |
| 6.19369E-10 | -1.59959486  |
| 0.00033     | -1.601290031 |
| 3.47936E-09 | -1.60154815  |
| 2.41945E-09 | -1.602765553 |
| 0.0001      | -1.604168559 |
| 2.02601E-07 | -1.608977608 |
| 7.24559E-10 | -1.609570486 |
| 0.00038     | -1.613838233 |
| 6.01417E-11 | -1.614990604 |
| 2.26845E-06 | -1.616702091 |
| 1.43349E-09 | -1.617931014 |
| 0.00054     | -1.61942187  |
| 0.00014     | -1.619981295 |
| 0.00002     | -1.620839455 |
| 4.05793E-08 | -1.621287372 |
| 6.68123E-09 | -1.623155023 |
| 2.52588E-10 | -1.623379285 |
| 4.11893E-14 | -1.62367835  |
| 2.68314E-08 | -1.624351448 |
| 8.68252E-11 | -1.624762923 |
| 1.95534E-09 | -1.625137082 |
| 0.00042     | -1.62655967  |
| 8.39773E-13 | -1.627346372 |
| 0.00028     | -1.627383843 |
| 4.67322E-10 | -1.628995933 |
| 8.32984E-06 | -1.629408584 |
| 6.66871E-09 | -1.631510977 |
| 1.24894E-08 | -1.631548544 |
| 0.0001      | -1.633503239 |
| 5.16427E-10 | -1.633841789 |
| 7.91146E-06 | -1.636100585 |
| 0.00017     | -1.636891901 |
| 3.87135E-13 | -1.637042672 |
| 0.00006     | -1.63775902  |
| 1.11544E-06 | -1.638023017 |
| 8.55608E-08 | -1.638287056 |
| 8.23428E-07 | -1.638702061 |
| 0.00002     | -1.639872187 |
| 6.43929E-14 | -1.640060995 |
| 2.12768E-08 | -1.640287593 |
| 3.02747E-11 | -1.64123209  |
| 1.18817E-08 | -1.643425419 |
| 1.44218E-13 | -1.644674656 |
| 1.11022E-16 | -1.645583788 |
| 0.00036     | -1.648883606 |
| 1.0369E-06  | -1.649453208 |
| 1.57652E-14 | -1.649681104 |
| 5.55112E-16 | -1.649833053 |

|             |              |
|-------------|--------------|
| 0.00004     | -1.650023008 |
| 3.3423E-07  | -1.651353305 |
| 1.53028E-11 | -1.651619493 |
| 2.2696E-10  | -1.652951078 |
| 0.00072     | -1.65435992  |
| 5.85254E-10 | -1.654931415 |
| 0.00012     | -1.655121957 |
| 7.46446E-09 | -1.655350636 |
| 0.00013     | -1.659510482 |
| 0.00006     | -1.659586907 |
| 2.98071E-07 | -1.662953096 |
| 0.00005     | -1.662991387 |
| 0.0003      | -1.665022091 |
| 0.00017     | -1.665175452 |
| 0.00029     | -1.668092002 |
| 1.5643E-12  | -1.670321226 |
| 0.00077     | -1.671783367 |
| 0.0001      | -1.671937351 |
| 1.92069E-14 | -1.672399388 |
| 0.00028     | -1.672707484 |
| 2.1692E-07  | -1.672823034 |
| 0.00006     | -1.67355504  |
| 2.94931E-06 | -1.674325918 |
| 4.37546E-09 | -1.675367167 |
| 2.25375E-12 | -1.67621607  |
| 0.00035     | -1.676254667 |
| 0.00005     | -1.677374359 |
| 2.91907E-07 | -1.678804018 |
| 6.43641E-10 | -1.679422626 |
| 2.46861E-10 | -1.679461297 |
| 0.00007     | -1.679499968 |
| 2.87069E-06 | -1.682712807 |
| 1.22845E-10 | -1.684767592 |
| 1.11022E-16 | -1.685233175 |
| 1.70611E-06 | -1.687679597 |
| 4.00132E-06 | -1.689779356 |
| 1.17353E-07 | -1.695781918 |
| 0.00032     | -1.696953727 |
| 0.00086     | -1.698439181 |
| 1.11022E-16 | -1.698439181 |
| 0.00005     | -1.700669801 |
| 0.00015     | -1.703256284 |
| 0.0002      | -1.705768146 |
| 8.37314E-07 | -1.706671751 |
| 2.22589E-12 | -1.70733994  |
| 1.23044E-08 | -1.707851085 |
| 6.39599E-13 | -1.70840172  |
| 6.66134E-16 | -1.709267362 |
| 7.28637E-08 | -1.709779084 |
| 8.52429E-13 | -1.710645424 |
| 1.04316E-07 | -1.711748674 |

|             |              |
|-------------|--------------|
| 0.00026     | -1.712142864 |
| 5.88615E-09 | -1.712970958 |
| 3.05367E-06 | -1.714075708 |
| 7.77156E-16 | -1.715378648 |
| 4.44089E-15 | -1.717591966 |
| 0.00001     | -1.718462265 |
| 0.0005      | -1.718462265 |
| 0.00026     | -1.720560705 |
| 2.00199E-07 | -1.723931479 |
| 6.52557E-11 | -1.724646137 |
| 3.14992E-07 | -1.727985126 |
| 3.43431E-08 | -1.728383056 |
| 0.0009      | -1.733125451 |
| 0.00004     | -1.735081983 |
| 0.00051     | -1.736280949 |
| 7.77156E-16 | -1.7386013   |
| 0.00004     | -1.739922884 |
| 0.00011     | -1.740644171 |
| 1.11022E-16 | -1.741967307 |
| 0.0006      | -1.744054291 |
| 5.8673E-07  | -1.744295257 |
| 5.69939E-10 | -1.744415753 |
| 0.00024     | -1.746626319 |
| 5.55112E-16 | -1.748638355 |
| 4.13167E-07 | -1.749242417 |
| 1.11022E-16 | -1.752467611 |
| 4.17677E-12 | -1.755860464 |
| 3.32068E-13 | -1.756507466 |
| 3.20481E-06 | -1.757195167 |
| 0.00058     | -1.757357018 |
| 1.44329E-15 | -1.757721237 |
| 5.55112E-16 | -1.759786574 |
| 0.00032     | -1.760110769 |
| 1.47388E-08 | -1.760840425 |
| 1.33227E-15 | -1.764574504 |
| 2.26594E-09 | -1.765346659 |
| 8.40703E-06 | -1.768438658 |
| 1.19328E-08 | -1.76957918  |
| 0.00049     | -1.769864426 |
| 0.0006      | -1.770108958 |
| 6.65066E-09 | -1.774271187 |
| 8.3417E-06  | -1.774843237 |
| 9.49241E-14 | -1.774884105 |
| 1.6768E-09  | -1.775538117 |
| 0.00056     | -1.775619885 |
| 0.00007     | -1.775619885 |
| 0.00002     | -1.776519586 |
| 0.0001      | -1.778361305 |
| 2.36644E-12 | -1.779877037 |
| 0.00055     | -1.781312026 |
| 0.00015     | -1.784842916 |



|             |              |
|-------------|--------------|
| 7.80779E-08 | -1.786652124 |
| 0.00063     | -1.787763227 |
| 1.10947E-11 | -1.788463165 |
| 1.87358E-11 | -1.790111116 |
| 0.00002     | -1.792462176 |
| 2.89207E-06 | -1.793742094 |
| 1.11022E-16 | -1.794196479 |
| 0.00002     | -1.795188262 |
| 0.00002     | -1.797380394 |
| 0.00002     | -1.797670121 |
| 0.00025     | -1.8005285   |
| 0.00001     | -1.806882867 |
| 0.00023     | -1.80846455  |
| 0.00019     | -1.811506931 |
| 2.88134E-09 | -1.811757217 |
| 0.00006     | -1.813384921 |
| 1.54475E-10 | -1.813718989 |
| 0.00005     | -1.815055879 |
| 1.6439E-10  | -1.815724694 |
| 1.34206E-07 | -1.815766503 |
| 7.4448E-06  | -1.816142828 |
| 0.00005     | -1.817900043 |
| 0.00025     | -1.820790589 |
| 4.56872E-07 | -1.828815947 |
| 0.00032     | -1.833200639 |
| 2.97586E-09 | -1.833791689 |
| 0.00001     | -1.838780968 |
| 9.03998E-06 | -1.841111115 |
| 0.00051     | -1.841323093 |
| 1.11022E-16 | -1.841450292 |
| 2.76476E-10 | -1.841747123 |
| 0.00017     | -1.842086416 |
| 0.0005      | -1.844760538 |
| 4.32521E-12 | -1.845695273 |
| 1.0886E-07  | -1.846460408 |
| 3.31624E-13 | -1.848715149 |
| 2.30884E-09 | -1.849183459 |
| 8.97027E-12 | -1.849779661 |
| 1.51536E-10 | -1.851228382 |
| 0.00004     | -1.852550263 |
| 1.08262E-10 | -1.854428102 |
| 3.98992E-08 | -1.854684319 |
| 2.34157E-12 | -1.858617406 |
| 0.00096     | -1.860972691 |
| 6.9903E-06  | -1.861229811 |
| 1.11168E-07 | -1.864146329 |
| 4.66855E-11 | -1.86822853  |
| 0.00002     | -1.868658755 |
| 0.00027     | -1.872837083 |
| 0.00006     | -1.873570329 |
| 1.15294E-06 | -1.874433339 |

|             |              |
|-------------|--------------|
| 1.03551E-10 | -1.878927401 |
| 1.11022E-16 | -1.882001651 |
| 0.0003      | -1.883041971 |
| 2.68126E-09 | -1.883172051 |
| 1.52448E-09 | -1.883172051 |
| 3.59918E-07 | -1.888643551 |
| 0.00027     | -1.894218178 |
| 0.00002     | -1.894305412 |
| 3.79768E-09 | -1.89443627  |
| 3.26088E-06 | -1.896662248 |
| 8.69487E-08 | -1.897448512 |
| 5.1491E-12  | -1.897841766 |
| 0.00004     | -1.899415598 |
| 0.00033     | -1.900596828 |
| 1.11022E-16 | -1.900990734 |
| 4.21885E-15 | -1.902260544 |
| 9.99201E-16 | -1.903750367 |
| 0.00007     | -1.906382313 |
| 8.21017E-06 | -1.906382313 |
| 0.00001     | -1.908138965 |
| 1.11022E-16 | -1.908534434 |
| 7.95169E-09 | -1.916461063 |
| 1.70324E-07 | -1.919287346 |
| 0.00001     | -1.921808014 |
| 0.00006     | -1.93263571  |
| 7.03373E-10 | -1.933303334 |
| 5.4067E-11  | -1.93722471  |
| 1.11022E-16 | -1.93856336  |
| 0.000001029 | -1.938741916 |
| 1.11022E-16 | -1.941064648 |
| 7.38165E-09 | -1.942540132 |
| 0.00001     | -1.945628862 |
| 0.00006     | -1.946883659 |
| 7.75856E-09 | -1.947197485 |
| 7.76697E-09 | -1.949709914 |
| 0.00003     | -1.951147043 |
| 1.95399E-14 | -1.953754539 |
| 1.11022E-16 | -1.953844515 |
| 3.86469E-12 | -1.962049681 |
| 1.58183E-08 | -1.965848294 |
| 1.72224E-08 | -1.96942751  |
| 9.23524E-06 | -1.969472858 |
| 2.21775E-11 | -1.970788412 |
| 4.10535E-06 | -1.972786103 |
| 0.00016     | -1.972876956 |
| 1.75349E-06 | -1.973603924 |
| 0.00008     | -1.976514478 |
| 7.46638E-06 | -1.979110304 |
| 0.00021     | -1.987101266 |
| 3.75683E-09 | -1.991590289 |
| 6.68823E-11 | -1.992003054 |

|             |              |
|-------------|--------------|
| 5.06151E-13 | -1.992140662 |
| 1.67571E-06 | -1.994205915 |
| 0.00001     | -1.996457181 |
| 0.00018     | -1.997422787 |
| 0.00003     | -2.000875194 |
| 8.25441E-06 | -2.003687551 |
| 1.11022E-16 | -2.010990412 |
| 0.00025     | -2.011314572 |
| 1.25296E-06 | -2.012658075 |
| 1.11188E-06 | -2.014512655 |
| 6.13457E-07 | -2.018831163 |
| 1.65261E-07 | -2.022972597 |
| 5.55112E-16 | -2.023345277 |
| 0.00004     | -2.023624832 |
| 1.01493E-10 | -2.030906829 |
| 0.00081     | -2.031655181 |
| 0.00021     | -2.03633863  |
| 9.56346E-13 | -2.038778288 |
| 0.00025     | -2.041973022 |
| 2.10301E-10 | -2.046067702 |
| 1.22014E-13 | -2.049179488 |
| 3.18412E-12 | -2.061151905 |
| 2.48836E-08 | -2.062101319 |
| 4.67214E-06 | -2.067949838 |
| 0.00001     | -2.075200197 |
| 1.89044E-06 | -2.080463017 |
| 0.00008     | -2.084442886 |
| 7.23229E-08 | -2.103051946 |
| 0.00005     | -2.103051946 |
| 7.82152E-13 | -2.105280656 |
| 1.2697E-09  | -2.106153402 |
| 8.24523E-11 | -2.113781049 |
| 0.00089     | -2.114949491 |
| 7.2037E-08  | -2.118068493 |
| 1.16007E-09 | -2.132357412 |
| 3.69169E-10 | -2.133536121 |
| 1.11022E-16 | -2.133585248 |
| 3.58492E-08 | -2.13796209  |
| 1.91736E-08 | -2.140868539 |
| 0.00006     | -2.143532142 |
| 2.62457E-13 | -2.143877666 |
| 0.00036     | -2.149116705 |
| 2.16841E-08 | -2.151741024 |
| 0.00067     | -2.162569134 |
| 1.11022E-16 | -2.16670607  |
| 6.66134E-16 | -2.16815337  |
| 1.11022E-16 | -2.173501779 |
| 4.03476E-06 | -2.175103864 |
| 0.00049     | -2.180218397 |
| 1.11022E-16 | -2.184439394 |
| 1.48481E-06 | -2.188265433 |

|             |              |
|-------------|--------------|
| 1.46311E-06 | -2.202723575 |
| 5.20384E-12 | -2.207648873 |
| 0.00076     | -2.208004733 |
| 0.00008     | -2.208004733 |
| 1.25455E-14 | -2.209632251 |
| 2.22045E-16 | -2.220802819 |
| 1.11022E-16 | -2.247139325 |
| 4.00378E-10 | -2.248536801 |
| 0.00065     | -2.257251758 |
| 0.0001      | -2.277823137 |
| 4.17444E-14 | -2.278190308 |
| 4.59093E-08 | -2.286230425 |
| 0.00001     | -2.300488147 |
| 2.03066E-07 | -2.304464382 |
| 2.77556E-15 | -2.310042659 |
| 1.11022E-16 | -2.337060741 |
| 3.93736E-09 | -2.340453408 |
| 2.45416E-08 | -2.354832386 |
| 0.00002     | -2.356025572 |
| 1.71076E-07 | -2.367282022 |
| 1.6517E-06  | -2.367663614 |
| 7.5015E-11  | -2.377278157 |
| 0.00016     | -2.385777838 |
| 6.74161E-07 | -2.3862723   |
| 0.00003     | -2.406245862 |
| 9.31415E-07 | -2.408296752 |
| 2.96563E-12 | -2.426889485 |
| 0.00003     | -2.428454663 |
| 6.7095E-10  | -2.433156256 |
| 0.0008      | -2.439832432 |
| 1.11022E-16 | -2.443374291 |
| 1.11022E-16 | -2.47662356  |
| 1.11022E-16 | -2.482104146 |
| 1.11022E-16 | -2.500863569 |
| 1.03757E-06 | -2.501669882 |
| 1.33227E-15 | -2.50766778  |
| 1.73224E-07 | -2.513795821 |
| 1.11022E-16 | -2.518372684 |
| 7.74517E-11 | -2.525224533 |
| 0.00004     | -2.533319698 |
| 0.00012     | -2.557937919 |
| 1.47295E-06 | -2.560059151 |
| 1.11022E-16 | -2.572705056 |
| 0.00002     | -2.576617784 |
| 1.7548E-06  | -2.57750787  |
| 1.37405E-10 | -2.591313753 |
| 1.11022E-16 | -2.612582419 |
| 1.11022E-16 | -2.625004184 |
| 1.11022E-16 | -2.643138983 |
| 1.24626E-08 | -2.651795321 |
| 2.92988E-13 | -2.659316327 |

|             |              |
|-------------|--------------|
| 9.4369E-15  | -2.681513576 |
| 0.00036     | -2.685777307 |
| 1.11022E-16 | -2.686519517 |
| 1.11022E-16 | -2.693146633 |
| 0.00004     | -2.711440009 |
| 1.16773E-12 | -2.745743727 |
| 9.26381E-12 | -2.747198243 |
| 0.00008     | -2.748273815 |
| 6.44778E-11 | -2.750426223 |
| 0.00019     | -2.752580317 |
| 0.0001      | -2.756639659 |
| 1.11022E-16 | -2.762485455 |
| 7.56784E-11 | -2.773256247 |
| 0.00026     | -2.799690348 |
| 6.94222E-13 | -2.800141641 |
| 0.00003     | -2.804981492 |
| 1.11022E-16 | -2.828394604 |
| 1.11022E-16 | -2.840207043 |
| 2.56239E-13 | -2.848787139 |
| 1.85889E-06 | -2.850952621 |
| 1.11022E-16 | -2.852200161 |
| 1.13255E-07 | -2.856801071 |
| 8.07865E-12 | -2.866157157 |
| 0.00011     | -2.885160648 |
| 1.11022E-16 | -2.892477571 |
| 0.00001     | -2.919106903 |
| 5.55112E-15 | -2.965309302 |
| 1.28009E-13 | -2.98895929  |
| 0.00003     | -3.000820375 |
| 0.0009      | -3.004208012 |
| 1.11022E-16 | -3.024753584 |
| 1.77168E-06 | -3.025798477 |
| 1.58595E-12 | -3.026146855 |
| 4.21885E-15 | -3.037945651 |
| 0.00073     | -3.067114577 |
| 1.11022E-16 | -3.079782167 |
| 1.11022E-16 | -3.085105358 |
| 6.55476E-12 | -3.096706174 |
| 0.00082     | -3.153842491 |
| 1.11022E-16 | -3.156094512 |
| 1.11022E-16 | -3.239664224 |
| 6.65622E-09 | -3.241604302 |
| 1.11022E-16 | -3.250199357 |
| 1.11022E-16 | -3.253344098 |
| 1.11022E-16 | -3.26054351  |
| 2.55818E-06 | -3.268586631 |
| 1.11022E-16 | -3.320626275 |
| 6.65357E-12 | -3.33964266  |
| 1.11022E-16 | -3.35606219  |
| 1.11022E-16 | -3.441517641 |
| 1.11022E-16 | -3.472561932 |

|             |              |
|-------------|--------------|
| 6.99441E-15 | -3.497437804 |
| 1.11022E-16 | -3.541440911 |
| 1.11022E-16 | -3.584016497 |
| 1.11022E-16 | -3.599067567 |
| 1.11022E-16 | -3.599316191 |
| 1.11022E-16 | -3.646783658 |
| 1.11022E-16 | -3.685530419 |
| 1.11022E-16 | -3.697685753 |
| 1.11022E-16 | -3.720574456 |
| 1.20761E-07 | -3.749384675 |
| 1.11022E-16 | -3.757162681 |
| 1.11022E-16 | -3.776939254 |
| 1.11022E-16 | -3.835394137 |
| 1.11022E-16 | -3.868654984 |
| 1.11022E-16 | -3.874984771 |
| 1.11022E-16 | -3.919493964 |
| 1.11022E-16 | -3.971275349 |
| 1.11022E-16 | -3.973196095 |
| 1.11022E-16 | -3.985749497 |
| 1.11022E-16 | -4.01263817  |
| 1.11022E-16 | -4.129904413 |
| 1.11022E-16 | -4.138090648 |
| 1.11022E-16 | -4.199233264 |
| 1.11022E-16 | -4.223086723 |
| 1.11022E-16 | -4.264813065 |
| 1.11022E-16 | -4.268448049 |
| 1.11022E-16 | -4.28272314  |
| 1.11022E-16 | -4.287360476 |
| 1.11022E-16 | -4.287656647 |
| 1.11022E-16 | -4.295957735 |
| 1.11022E-16 | -4.315886351 |
| 1.11022E-16 | -4.32882471  |
| 1.11022E-16 | -4.33770487  |
| 1.11022E-16 | -4.348004651 |
| 1.11022E-16 | -4.368174709 |
| 1.11022E-16 | -4.371897789 |
| 1.11022E-16 | -4.412452061 |
| 1.9656E-06  | -4.430880119 |
| 1.11022E-16 | -4.474453509 |
| 1.11022E-16 | -4.477751623 |
| 1.11022E-16 | -4.492830144 |
| 1.11022E-16 | -4.497384305 |
| 1.11022E-16 | -4.519183749 |
| 1.11022E-16 | -4.520848984 |
| 1.11022E-16 | -4.531896679 |
| 0.00008     | -4.539207123 |
| 1.11022E-16 | -4.597799196 |
| 2.51732E-06 | -4.642693356 |
| 1.11022E-16 | -4.713136307 |
| 1.11022E-16 | -4.76672393  |
| 1.11022E-16 | -4.772324869 |

|             |              |
|-------------|--------------|
| 1.11022E-16 | -4.838714522 |
| 1.11022E-16 | -4.918809464 |
| 1.11022E-16 | -5.017414725 |
| 1.11022E-16 | -5.078202325 |
| 1.11022E-16 | -5.111990052 |
| 1.11022E-16 | -5.260293785 |
| 1.11022E-16 | -5.285182642 |
| 1.11022E-16 | -5.302369639 |
| 1.11022E-16 | -5.35895364  |
| 1.11022E-16 | -5.416141475 |
| 1.11022E-16 | -5.467892907 |
| 2.06622E-08 | -5.651061061 |
| 1.36612E-07 | -5.894812557 |
| 1.11022E-16 | -7.446805314 |
| 1.11022E-16 | -7.970214324 |
| 1.11022E-16 | -8.330287686 |
| 1.11022E-16 | -8.61965731  |
| 0.00069     | -9.598204526 |
| 1.11022E-16 | -10.02628395 |
| 6.48635E-07 | -10.91591135 |
