# Supplementary material
Source: PubMed Central journal article supplement (PMC3016711)
Supplement: NIHMS258995-supplement-Suppl_5.pdf [file NIHMS258995-supplement-Suppl_5.pdf]

**Table S5.** Differentially expressed genes in the esophagus of rats treated with NMBA, PEITC or NMBA + PEITC and associated with cell cycle genes. Fold changes are relative to control samples. Genes are sorted by symbol. Reporter name is the Agilent probe identifier.

| Unigene   | Reporter Name | Gene Symbol | Sequence Description                                                                    | NCBI GeneID | Accession | NMBA FC | NMBA+PEITC FC | PEITC FC |
|-----------|---------------|-------------|-----------------------------------------------------------------------------------------|-------------|-----------|---------|---------------|----------|
| Rn.7264   | A_42_P570241  | 288366_Rn   | ESTs, Moderately similar to PBEF_HUMAN PRE-B CELL ENHANCING FACTOR PRECURSOR            | 297508      | BF523891  | -2.13   | 1.12          | -1.19    |
| Rn.92509  | A_42_P799390  | 298760_Rn   | ESTs, Moderately similar to CYCLIN-DEPENDENT KINASE INHIBITOR 1C [M.musculus]           | 246060      | AI599589  | 1.62    | -1.11         | -1.05    |
| Rn.1792   | A_44_P524359  | Anxa1       | Annexin 1 (p35) (Lipocortin 1)                                                          | 25380       | NM_012904 | 2.85    | 1.23          | -1.04    |
| Rn.1792   | A_43_P11614   | Anxa1       | Annexin 1 (p35) (Lipocortin 1)                                                          | 25380       | NM_012904 | 3.36    | 1.40          | 1.10     |
| Rn.10550  | A_44_P682186  | AW917472    | ESTs                                                                                    | 25492       | AW917472  | -1.71   | -1.11         | 1.01     |
| Rn.96215  | A_44_P452024  | Bzw1        | Rattus norvegicus basic leucine zipper and W2 domains 1 (Bzw1), mRNA [NM_198789]        | 363232      | NM_198789 | 1.99    | -1.03         | -1.21    |
| Rn.4166   | A_44_P191784  | Calm1       | Calmodulin 1 (phosphorylase kinase, delta)                                              | 24242       | NM_031969 | 1.70    | 1.08          | -1.07    |
| Rn.13094  | A_44_P527480  | Ccna2       | Rattus norvegicus cyclin A2 (Ccna2), mRNA [XM_342229]                                   | 114494      | XM_342229 | 1.90    | -1.01         | -1.16    |
| Rn.9232   | A_44_P534089  | Ccnb1       | Rattus norvegicus cyclin B1 (Ccnb1), mRNA [NM_171991]                                   | 25203       | NM_171991 | 1.70    | 1.06          | -1.04    |
| Rn.22279  | A_44_P411505  | Ccnd1       | Rattus norvegicus cyclin D1 (Ccnd1), mRNA [NM_171992]                                   | 58919       | NM_171992 | 1.67    | -1.07         | -1.09    |
| Rn.22279  | A_44_P189299  | Ccnd1       | Rattus norvegicus cyclin D1 (Ccnd1), mRNA [NM_171992]                                   | 58919       | NM_171992 | 2.30    | -1.05         | -1.21    |
| Rn.5834   | A_44_P367761  | Ccng1       | Cyclin G1                                                                               | 25405       | NM_012923 | 3.13    | 1.09          | -1.26    |
| Rn.5834   | A_44_P235919  | Ccng1       | Cyclin G1                                                                               | 25405       | NM_012923 | 2.95    | -1.10         | -1.44    |
| Rn.17982  | A_44_P441773  | Cdc37       | CDC37 (cell division cycle 37, S. cerevisiae, homolog)                                  | 114562      | NM_053743 | 1.90    | -1.07         | -1.26    |
| Rn.10089  | A_44_P515275  | Cdkn1a      | Rattus norvegicus cyclin-dependent kinase inhibitor 1A (Cdkn1a), mRNA [NM_080782]       | 114851      | NM_080782 | 1.88    | 1.17          | 1.17     |
| Rn.11306  | A_42_P693821  | Fosl1       | Fos-like antigen 1                                                                      | 25445       | NM_012953 | 1.69    | 1.06          | -1.03    |
| Rn.10250  | A_44_P216395  | Gadd45a     | DNA-damage-inducible transcript 1                                                       | 25112       | NM_024127 | 1.71    | 1.04          | 1.05     |
| Rn.79863  | A_44_P1024065 | Hdac5       | Rattus norvegicus histone deacetylase 5 (Hdac5), mRNA [XM_213469]                       | 84580       | XM_213469 | -1.51   | 1.07          | -1.05    |
| Rn.120392 | A_44_P452492  | Hspa8       | heat shock 70kD protein 8                                                               | 24468       | NM_024351 | 2.26    | -1.07         | -1.13    |
| Rn.120392 | A_44_P424367  | Hspa8       | heat shock 70kD protein 8                                                               | 24468       | NM_024351 | 1.79    | -1.10         | -1.31    |
| Rn.120392 | A_44_P396546  | Hspa8       | heat shock 70kD protein 8                                                               | 24468       | NM_024351 | 1.96    | 1.10          | -1.09    |
| Rn.120392 | A_43_P12417   | Hspa8       | heat shock 70kD protein 8                                                               | 24468       | NM_024351 | 1.97    | -1.21         | -1.29    |
| Rn.9869   | A_43_P14911   | Il1b        | Interleukin 1 beta                                                                      | 24494       | NM_031512 | 2.84    | 1.29          | 1.23     |
| Rn.15806  | A_43_P12125   | Junb        | jun B proto-oncogene                                                                    | 24517       | NM_021836 | 2.18    | 1.24          | 1.02     |
| Rn.88457  | A_42_P727584  | Mapk6       | mitogen-activated protein kinase 6                                                      | 58840       | NM_031622 | 2.45    | 1.17          | -1.01    |
| Rn.33226  | A_44_P276338  | Mcmd6       | Rattus norvegicus mini chromosome maintenance deficient 6 (S. cerevisiae) (Mcmd6), mRNA | 29685       | XM_344135 | 1.95    | -1.04         | -1.26    |
| Rn.4073   | A_42_P579376  | Nbl1        | Neuroblastoma, suppression of tumorigenicity 1 (DNA segment human D1S1733E)             | 50594       | NM_031609 | -1.62   | -1.05         | -1.06    |
| Rn.10550  | A_42_P692054  | Nfia        | Nuclear Factor IA                                                                       | 25492       | NM_012988 | -1.78   | -1.05         | -1.00    |
| Rn.54537  | A_44_P1058389 | Npm1        | Nucleoplasmin-related protein (Nuclear protein B23)                                     | 25498       | NM_012992 | 1.66    | 1.06          | -1.14    |
| Rn.223    | A_44_P242756  | Pcna        | Proliferating cell nuclear antigen                                                      | 25737       | NM_022381 | 2.07    | 1.05          | -1.26    |
| Rn.223    | A_44_P995132  | Pcna        | Proliferating cell nuclear antigen                                                      | 25737       | NM_022381 | 1.86    | 1.11          | -1.00    |
| Rn.9284   | A_44_P135224  | Plk3        | Rattus norvegicus cytokine inducible kinase (Cnk), mRNA [XM_342888]                     | 58936       | XM_342888 | 2.22    | 1.26          | 1.12     |
| Rn.1271   | A_44_P273990  | Ppp2ca      | Protein phosphatase 2 (formerly 2A), catalytic subunit, alpha isoform                   | 24672       | NM_017039 | 1.87    | 1.24          | 1.01     |
| Rn.1271   | A_44_P273989  | Ppp2ca      | Protein phosphatase 2 (formerly 2A), catalytic subunit, alpha isoform                   | 24672       | NM_017039 | 2.14    | 1.38          | 1.11     |
| Rn.10990  | A_44_P399992  | Prkar1a     | Protein kinase, cAMP dependent, regulatory, type 1                                      | 25725       | NM_013181 | 1.76    | -1.02         | -1.04    |
| Rn.1653   | A_44_P242694  | Ptn         | Pleiotrophin (Heparine binding factor, Hbnf, in the mouse)                              | 24924       | AI071874  | -3.34   | -1.26         | -1.14    |

|           |              |       |                                                                                        |        |           |       |       |       |
|-----------|--------------|-------|----------------------------------------------------------------------------------------|--------|-----------|-------|-------|-------|
| Rn.1653   | A_44_P242691 | Ptn   | Pleiotrophin (Heparine binding factor, Hbnf, in the mouse)                             | 24924  | AI102795  | -2.77 | -1.06 | 1.14  |
| Rn.1653   | A_43_P11804  | Ptn   | Pleiotrophin (Heparine binding factor, Hbnf, in the mouse)                             | 24924  | NM_017066 | -5.47 | -1.06 | -1.49 |
| Rn.1653   | A_44_P242690 | Ptn   | Pleiotrophin (Heparine binding factor, Hbnf, in the mouse)                             | 24924  | AI102795  | -5.29 | -1.21 | -1.19 |
| Rn.107698 | A_43_P12806  | Ran   | RAN, member RAS oncogene family                                                        | 84509  | NM_053439 | 2.05  | -1.01 | 1.01  |
| Rn.107698 | A_44_P168184 | Ran   | Rattus norvegicus GTP-ase Ran mRNA, complete cds. [AF507943]                           | 84509  | AF507943  | 1.95  | -1.04 | -1.13 |
| Rn.101236 | A_44_P992578 | Rrm2  | Rattus norvegicus similar to M2 ribonucleotide reductase (LOC362720), mRNA [XM_343040] | 304657 | XM_343040 | 3.36  | 1.17  | 1.05  |
| Rn.29936  | A_44_P325791 | Ywhag | 14-3-3 protein gamma-subtype                                                           | 56010  | NM_019376 | 2.02  | 1.13  | -1.03 |
