# Supplementary material
Source: PubMed Central journal article supplement (PMC3016711)
Supplement: NIHMS258995-supplement-Suppl_7.pdf [file NIHMS258995-supplement-Suppl_7.pdf]

**Table S7.** Differentially expressed genes in the esophagus of rats treated with NMBA, PEITC or NMBA + PEITC and associated with cell death. Fold changes are relative to control samples. Genes are sorted by symbol. Reporter name is the Agilent probe identifier.

| Unigene   | Reporter Name | Gene Symbol | Sequence Description                                                                                   | NCBI GeneID | Accession | NMBA FC | NMBA+PEITC FC | PEITC FC |
|-----------|---------------|-------------|--------------------------------------------------------------------------------------------------------|-------------|-----------|---------|---------------|----------|
| Rn.18935  | A_42_P640792  | 293856_Rn   | Rattus norvegicus gap junction protein, beta 6 (connexin 30) (Gjb6), mRNA.                             | 84403       | NM_053388 | 2.99    | 1.07          | 1.62     |
| Rn.22325  | A_42_P543774  | 298524_Rn   | Rattus norvegicus kinase (LOC246273), mRNA.                                                            | 246273      | NM_144755 | 2.08    | 1.09          | 1.27     |
| Rn.32351  | A_44_P171440  | Apoe        | Rattus norvegicus apolipoprotein E (Apoe), mRNA [NM_138828]                                            | 25728       | NM_138828 | -2.51   | -1.11         | -1.04    |
| Rn.25176  | A_44_P437945  | Bbc3        | Rattus norvegicus Bcl-2 binding component 3 (Bbc3), mRNA [NM_173837]                                   | 317673      | NM_173837 | 1.79    | 1.11          | 1.16     |
| Rn.10562  | A_44_P530813  | Casp3       | Caspase 3, apoptosis related cysteine protease (ICE-like cysteine protease)                            | 25402       | NM_012922 | 2.30    | -1.05         | -1.42    |
| Rn.6479   | A_44_P348922  | Cebpb       | Liver activating protein (LAP, also NF-IL6, nuclear factor-IL6, previously designated TCF5)            | 24253       | NM_024125 | 1.81    | 1.20          | 1.27     |
| Rn.29996  | A_44_P1057690 | Dnase1l3    | deoxyribonuclease I-like 3                                                                             | 116687      | NM_053907 | 5.63    | 1.36          | 1.34     |
| Rn.91450  | A_44_P363377  | Gapd        | Glyceraldehyde-3-phosphate dehydrogenase                                                               | 24383       | NM_017008 | 1.67    | -1.39         | -1.16    |
| Rn.91450  | A_44_P193181  | Gapd        | Glyceraldehyde-3-phosphate dehydrogenase                                                               | 24383       | NM_017008 | 1.74    | -1.37         | -1.14    |
| Rn.28195  | A_44_P390495  | Gch         | GTP cyclohydrolase 1                                                                                   | 29244       | NM_024356 | 3.28    | 1.52          | 1.40     |
| Rn.3160   | A_43_P11472   | Hmox1       | Heme oxygenase                                                                                         | 24451       | NM_012580 | 2.04    | 1.23          | 1.27     |
| Rn.11118  | A_44_P161233  | Il18        | interleukin 18                                                                                         | 29197       | NM_019165 | 2.88    | 1.78          | 1.38     |
| Rn.44266  | A_42_P665509  | Mapk8ip1    | mitogen-activated protein kinase 8 interacting protein 1                                               | 116457      | NM_053777 | -1.64   | 1.01          | 1.21     |
| Rn.4067   | A_44_P101211  | Mcl1        | myeloid cell leukemia sequence 1                                                                       | 60430       | NM_021846 | 1.93    | 1.11          | -1.21    |
| Rn.54537  | A_44_P1058389 | Npm1        | Nucleoplasmin-related protein (Nuclear protein B23                                                     | 25498       | NM_012992 | 1.66    | 1.06          | -1.14    |
| Rn.2925   | A_44_P1019245 | PAG608      | p53-activated gene 608                                                                                 | 64394       | NM_022548 | 2.11    | 1.40          | 1.44     |
| Rn.1271   | A_44_P273989  | Ppp2ca      | Protein phosphatase 2 (formerly 2A), catalytic subunit, alpha isoform                                  | 24672       | NM_017039 | 2.14    | 1.38          | 1.11     |
| Rn.1271   | A_44_P273990  | Ppp2ca      | Protein phosphatase 2 (formerly 2A), catalytic subunit, alpha isoform                                  | 24672       | NM_017039 | 1.87    | 1.24          | 1.01     |
| Rn.7817   | A_44_P226597  | Pycard      | Rattus norvegicus apoptosis-associated speck-like protein containing a CARD (Pycard), mRNA [NM_172322] | 282817      | NM_172322 | -2.34   | 1.01          | -1.01    |
| Rn.2816   | A_42_P659466  | Raga        | Ras-related GTP-binding protein ragA                                                                   | 117044      | NM_053973 | 1.89    | 1.25          | -1.16    |
| Rn.107226 | A_44_P999845  | Sh3kbp1     | Rattus norvegicus SH3-domain kinase binding protein 1 (Sh3kbp1), mRNA [NM_053360]                      | 84357       | NM_053360 | 2.19    | 1.14          | 1.10     |
| Rn.40778  | A_44_P351211  | Tdag        | T-cell death associated gene                                                                           | 29380       | NM_017180 | 1.82    | 1.12          | 1.01     |
| Rn.40778  | A_44_P351209  | Tdag        | T-cell death associated gene                                                                           | 29380       | NM_017180 | 3.01    | 1.12          | 1.34     |
| Rn.2398   | A_43_P12535   | Tieg        | TGFB inducible early growth response                                                                   | 81813       | NM_031135 | 1.82    | 1.18          | 1.24     |
| Rn.29936  | A_44_P325791  | Ywhag       | 14-3-3 protein gamma-subtype                                                                           | 56010       | NM_019376 | 2.02    | 1.13          | -1.03    |
